# Supplementary material for: Synthesis of β-analogues of C-mannosyltryptophan, a novel C-glycosylamino acid found in proteins
Source: Royal Society of Chemistry journal article supplement (doi:10.1039/b516282c), 2006-01-01

**Supplementary Information**  
**for**  
**Synthesis of  $\beta$ -Analogues of C-Mannosyltryptophan, a Novel**  
**C-Glycosylamino acid Found in Proteins**

Toshio Nishikawa,<sup>a,b,\*</sup> Yuya Koide,<sup>a</sup> Akira Kanakubo,<sup>a</sup> Hiroshi Yoshimura,<sup>a</sup> and Minoru Isobe<sup>a,\*</sup>

*<sup>a</sup>Laboratory of Organic Chemistry1 Graduate School of Bioagricultural Sciences,  
Nagoya University, Chikusa, Nagoya 464-8601, Japan*

*<sup>b</sup>PRESTO, Japan Science and Technology Agency*

expi stdlh

| SAMPLE      |           | DEC. & VT            |                |
|-------------|-----------|----------------------|----------------|
| date        | Apr 12 04 | dfrq                 | 299.957        |
| solvent     | CDCl3     | dn                   | H1             |
| file        | exp       | dof                  | -10000.0       |
| ACQUISITION |           |                      |                |
| sfrq        | 299.967   | dm                   | nan            |
| tn          | H1        | dmm                  | c              |
| at          | 3.748     | dmf                  | 200            |
| PROCESSING  |           |                      |                |
| np          | 33728     | wtfile               |                |
| sw          | 4499.5    | proc                 | ft             |
| fb          | 2250      | fn                   | not used       |
| bs          | 16        |                      |                |
| pw          | 6.0       | werr                 | react          |
| dl          | 0.252     | wexp                 | autolist('ent- |
| tof         | 149.3     | erJ', 'hl_process_J- |                |
| nt          | 16        |                      | 301')          |
| ct          | 16        | wbs                  |                |
| alock       | n         | wnt                  |                |
| gain        | not used  |                      |                |
| FLAGS       |           |                      |                |
| il          | n         |                      |                |
| in          | n         |                      |                |
| dp          | y         |                      |                |
| DISPLAY     |           |                      |                |
| sp          | -601.2    |                      |                |
| wp          | 4499.5    |                      |                |
| va          | 5483      |                      |                |
| sc          | 0         |                      |                |
| wc          | 400       |                      |                |
| hzmm        | 11.25     |                      |                |
| is          | 22885.60  |                      |                |
| rfl         | 601.2     |                      |                |
| rffp        | 0         |                      |                |
| th          | 2         |                      |                |
| ins         | 1.000     |                      |                |
| ai          | cdc ph    |                      |                |

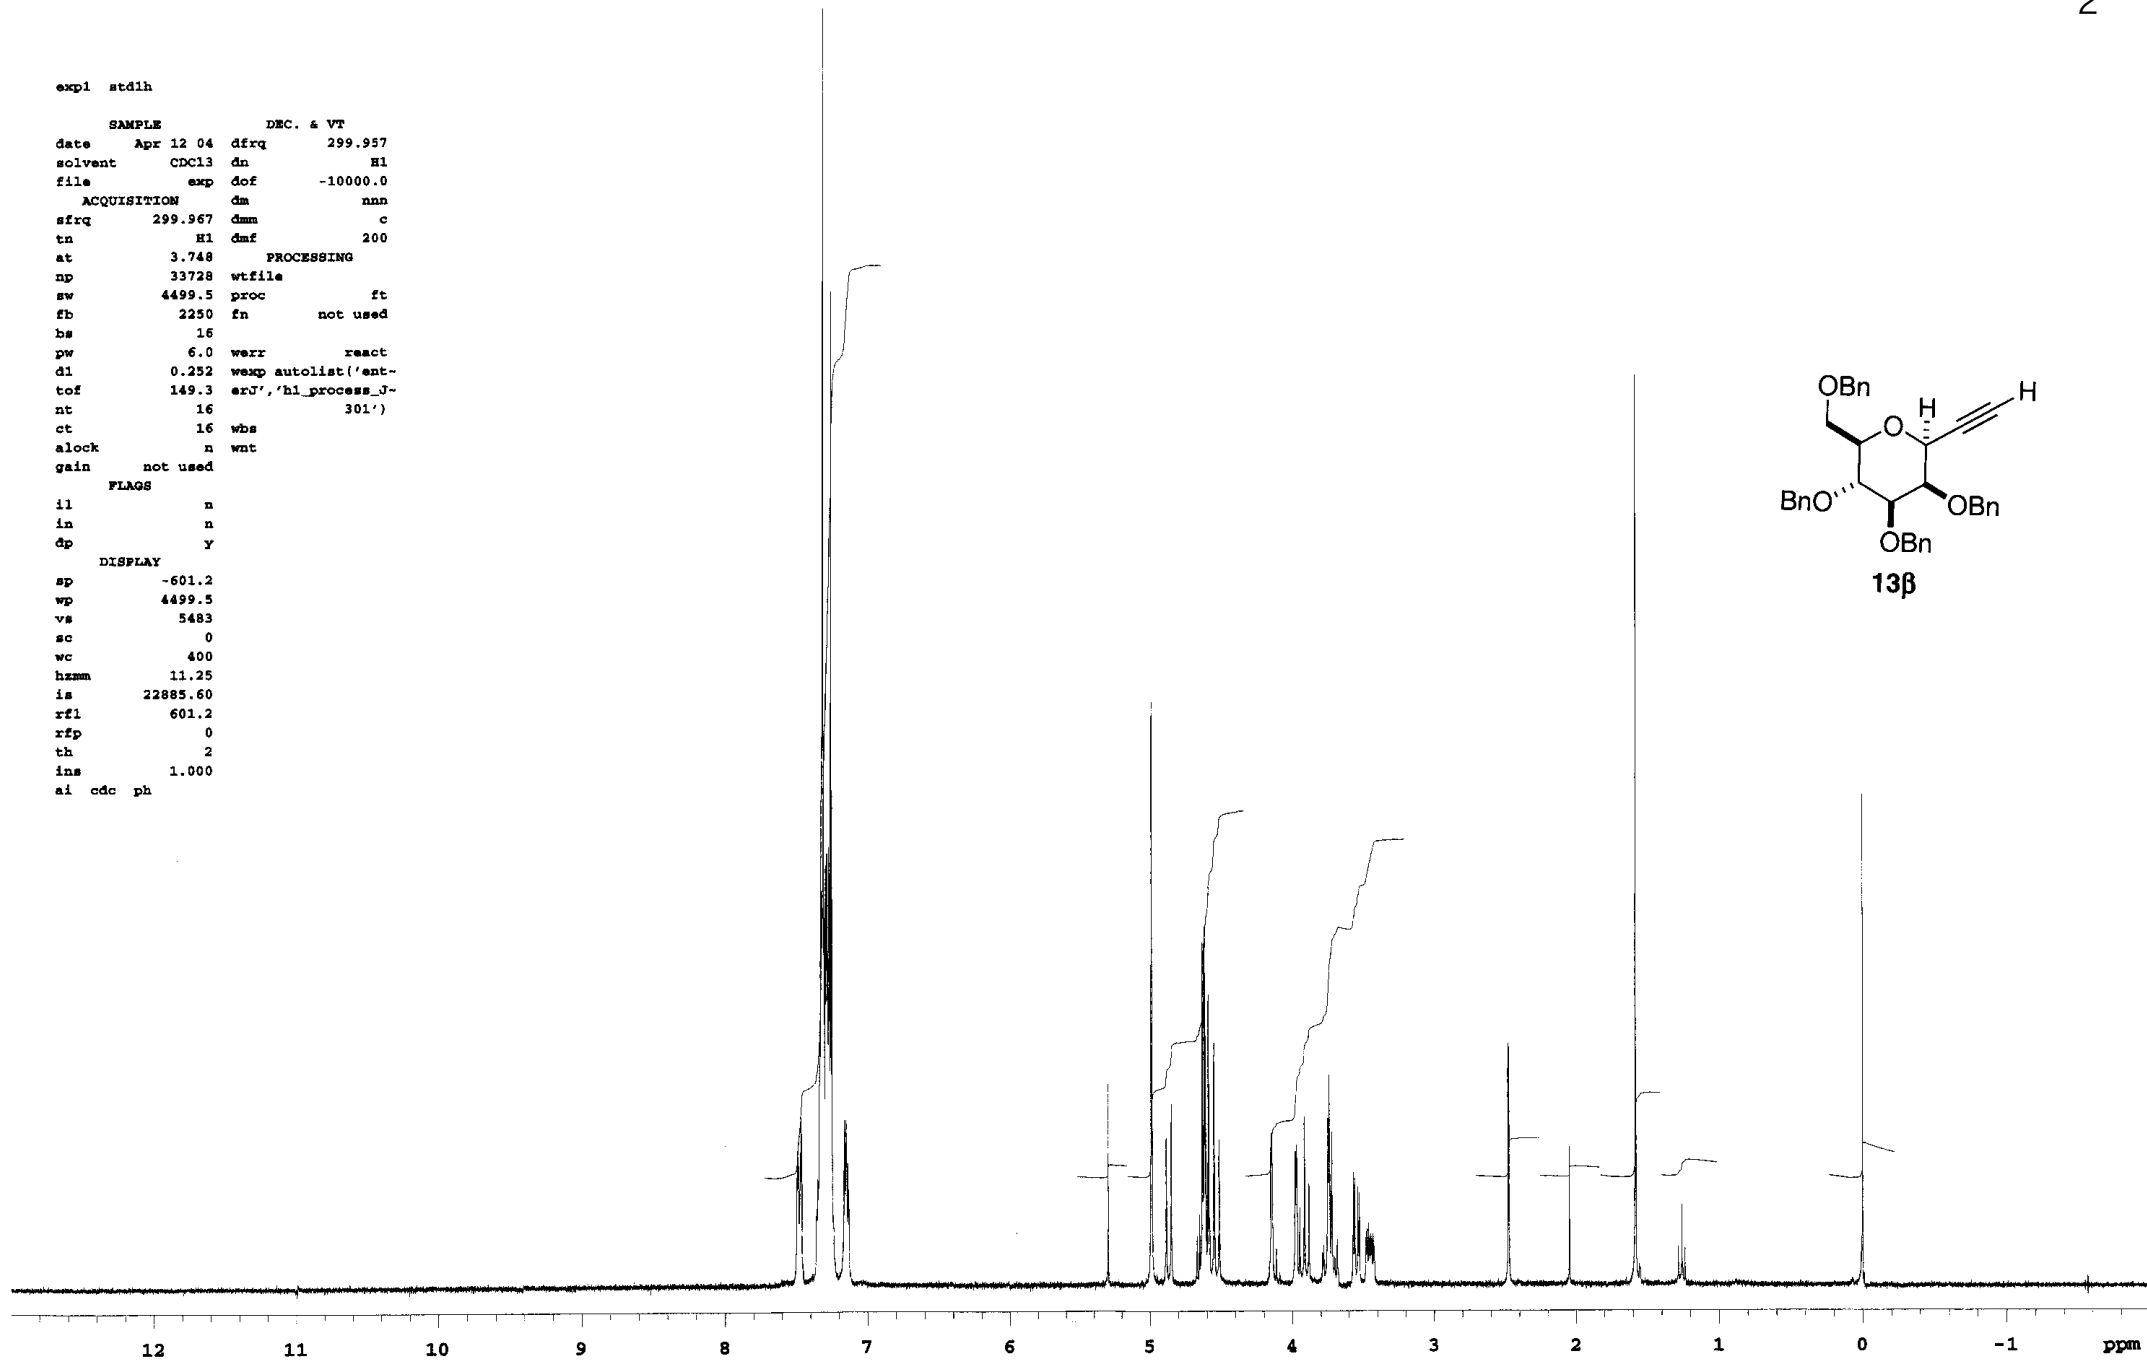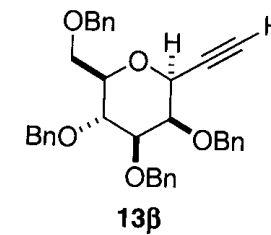

expl std13c

```
SAMPLE DEC. & VT
date Aug 9 04 dfrq 299.967
solvent CDCl3 dn R1
file exp dof 0
ACQUISITION dn vvy
sfrq 75.434 dnm w
tn C13 dmf 11329
at 1.697 PROCESSING
np 64000 lb 2.00
sw 18858.5 wtfile
fb 9500 proc ft
bs 16 fn not used
pw 8.2
dl 0 werr react
tof 320.2 wexp autolist('ent-
nt 384 exJ', 'c13_process_
ct 384 J368')
alock n wbs
gain not used vnt

FLAGS
il n
in n
dp Y

DISPLAY
sp -1535.4
wp 18858.5
vs 6588
sc 0
wc 400
hmm 47.15
is 500.00
rf1 7343.8
rfp 5808.4
th 13
ins 1.000
ai no ph
```

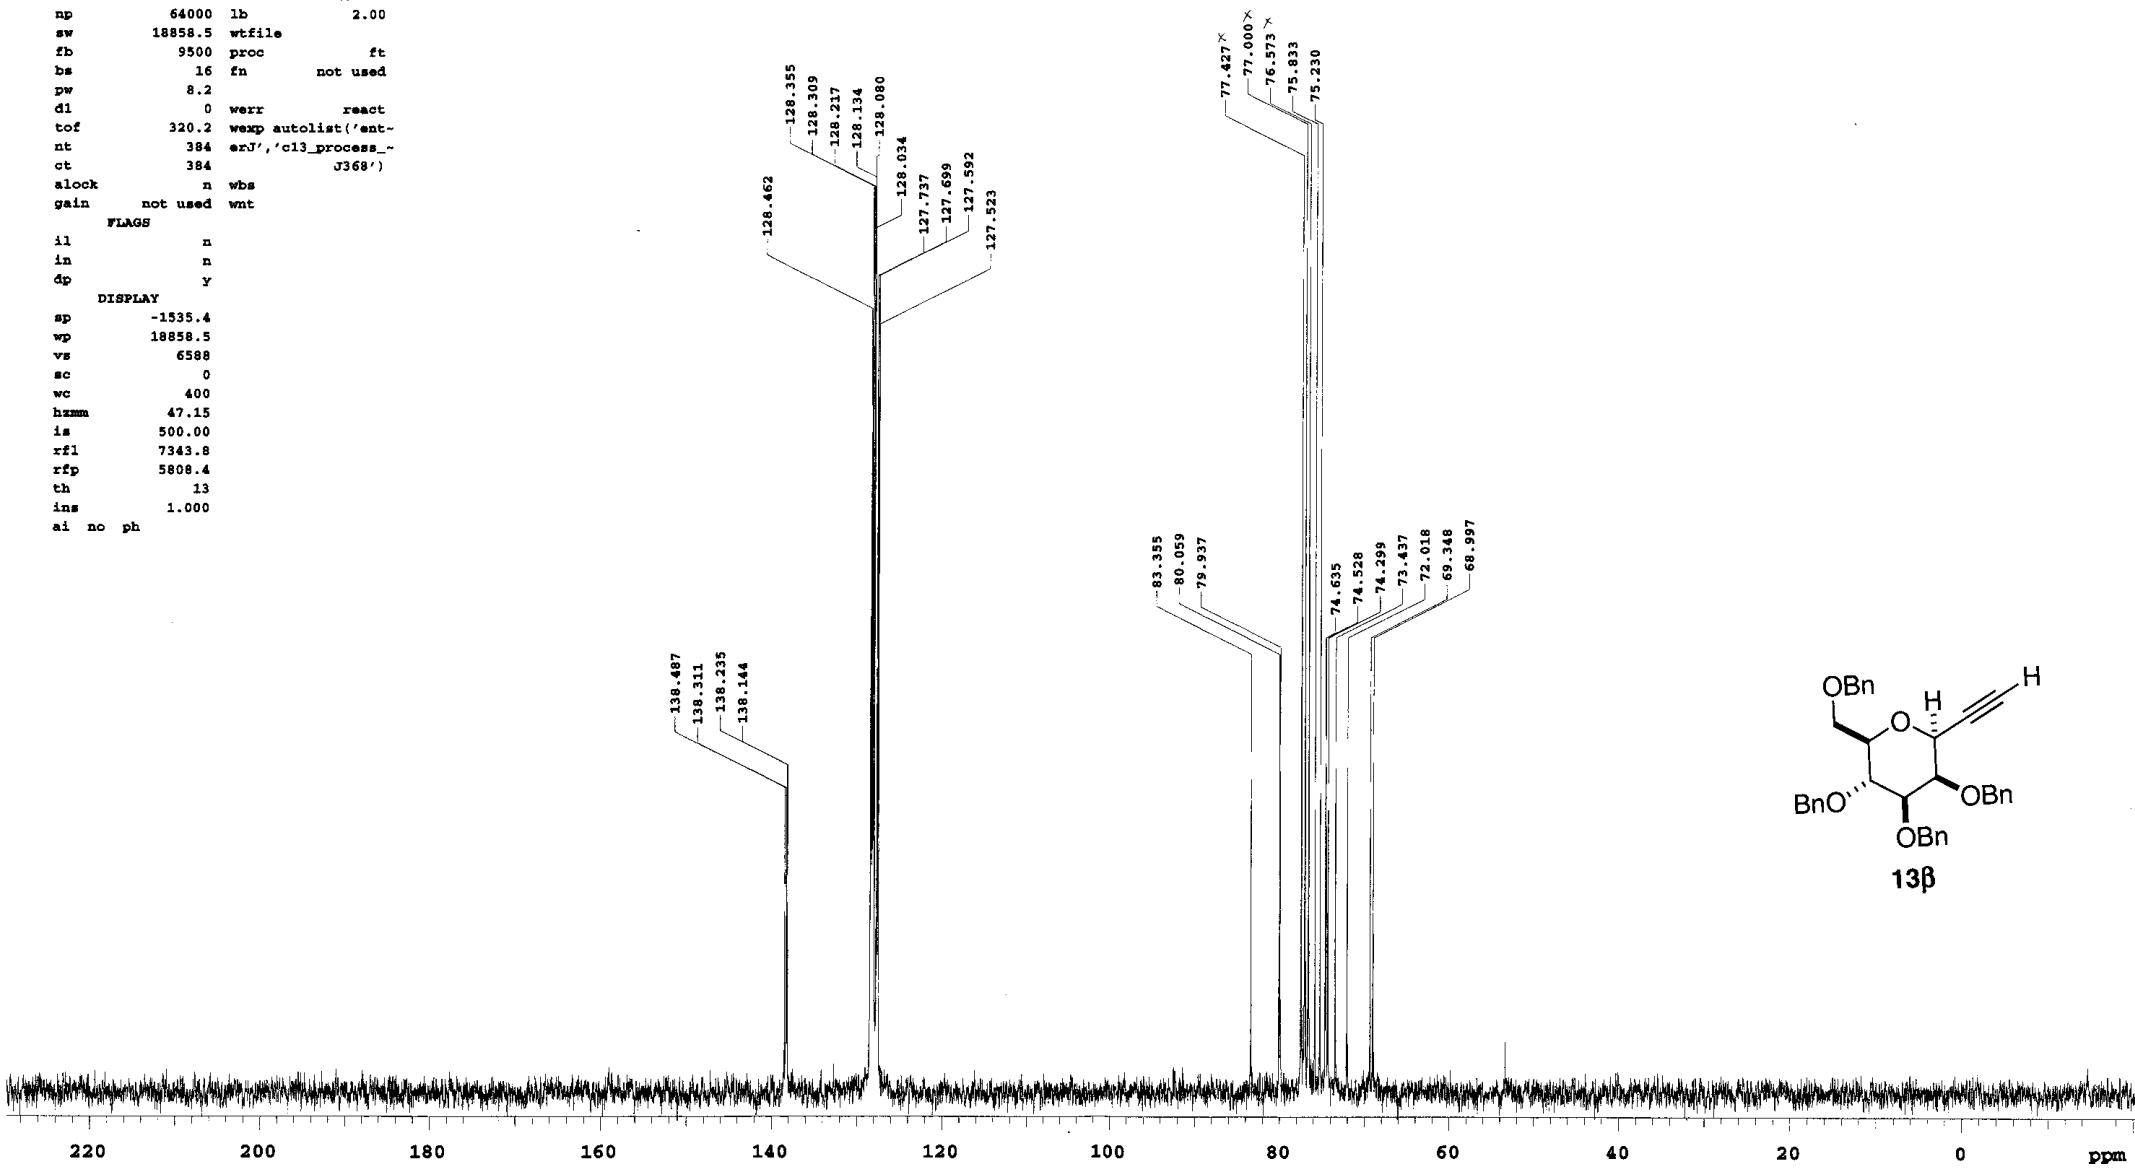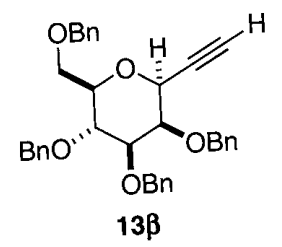

Ac-III

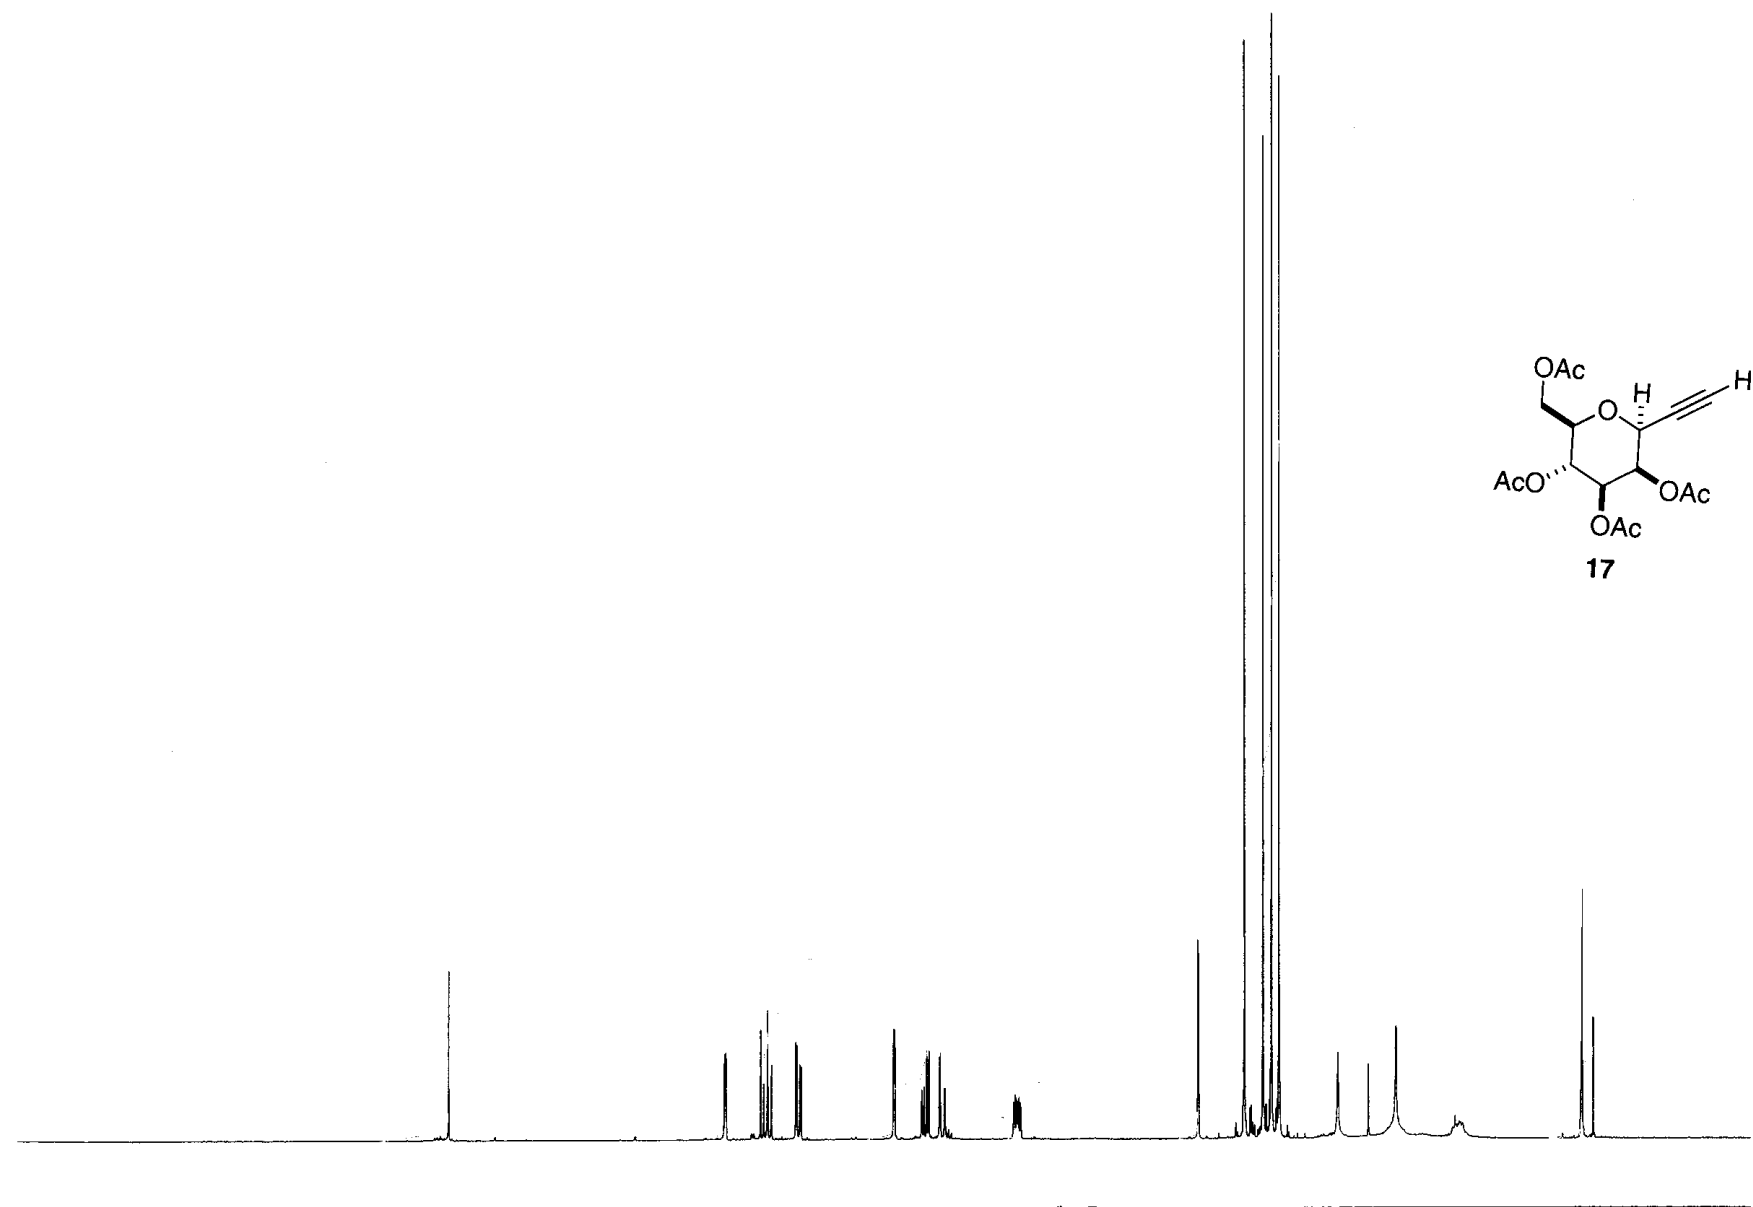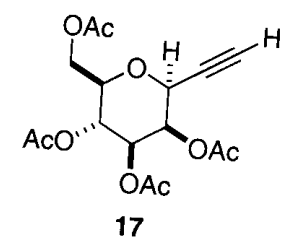

1H NMR (400 MHz, CDCl3)  $\delta$  7.2 (s, 1H), 5.4 (d, 1H), 5.2 (d, 1H), 5.1 (d, 1H), 4.4 (d, 1H), 4.3 (d, 1H), 4.2 (d, 1H), 3.5 (s, 1H), 2.1 (s, 21H), 1.4 (s, 3H), 1.2 (s, 3H), 1.1 (s, 3H), 0.0 (s, 3H).  
 13C NMR (100 MHz, CDCl3)  $\delta$  200.0, 170.0, 169.0, 168.0, 167.0, 166.0, 165.0, 164.0, 163.0, 162.0, 161.0, 160.0, 159.0, 158.0, 157.0, 156.0, 155.0, 154.0, 153.0, 152.0, 151.0, 150.0, 149.0, 148.0, 147.0, 146.0, 145.0, 144.0, 143.0, 142.0, 141.0, 140.0, 139.0, 138.0, 137.0, 136.0, 135.0, 134.0, 133.0, 132.0, 131.0, 130.0, 129.0, 128.0, 127.0, 126.0, 125.0, 124.0, 123.0, 122.0, 121.0, 120.0, 119.0, 118.0, 117.0, 116.0, 115.0, 114.0, 113.0, 112.0, 111.0, 110.0, 109.0, 108.0, 107.0, 106.0, 105.0, 104.0, 103.0, 102.0, 101.0, 100.0, 99.0, 98.0, 97.0, 96.0, 95.0, 94.0, 93.0, 92.0, 91.0, 90.0, 89.0, 88.0, 87.0, 86.0, 85.0, 84.0, 83.0, 82.0, 81.0, 80.0, 79.0, 78.0, 77.0, 76.0, 75.0, 74.0, 73.0, 72.0, 71.0, 70.0, 69.0, 68.0, 67.0, 66.0, 65.0, 64.0, 63.0, 62.0, 61.0, 60.0, 59.0, 58.0, 57.0, 56.0, 55.0, 54.0, 53.0, 52.0, 51.0, 50.0, 49.0, 48.0, 47.0, 46.0, 45.0, 44.0, 43.0, 42.0, 41.0, 40.0, 39.0, 38.0, 37.0, 36.0, 35.0, 34.0, 33.0, 32.0, 31.0, 30.0, 29.0, 28.0, 27.0, 26.0, 25.0, 24.0, 23.0, 22.0, 21.0, 20.0, 19.0, 18.0, 17.0, 16.0, 15.0, 14.0, 13.0, 12.0, 11.0, 10.0, 9.0, 8.0, 7.0, 6.0, 5.0, 4.0, 3.0, 2.0, 1.0, 0.0.

Current Data Parameters  
NAME koido400-1  
EXPNO 30  
PROCNO 1

F2 - Acquisition Parameters  
Date\_ 701025  
Time 10.35  
INSTRUM ARX400  
PROBHD 5 mm QNP  
PULPROG zgpg30  
TD 32768  
SOLVENT CDCL3  
NS 8  
DS 2  
SWH 6410.256 Hz  
FIDRES 0.195625 Hz  
AQ 2.5559540 sec  
RG 2860  
DW 78.000 usec  
DE 97.50 usec  
TE 300.0 K

F2 - Processing parameters  
SI 16384

M1

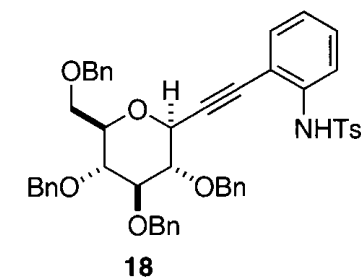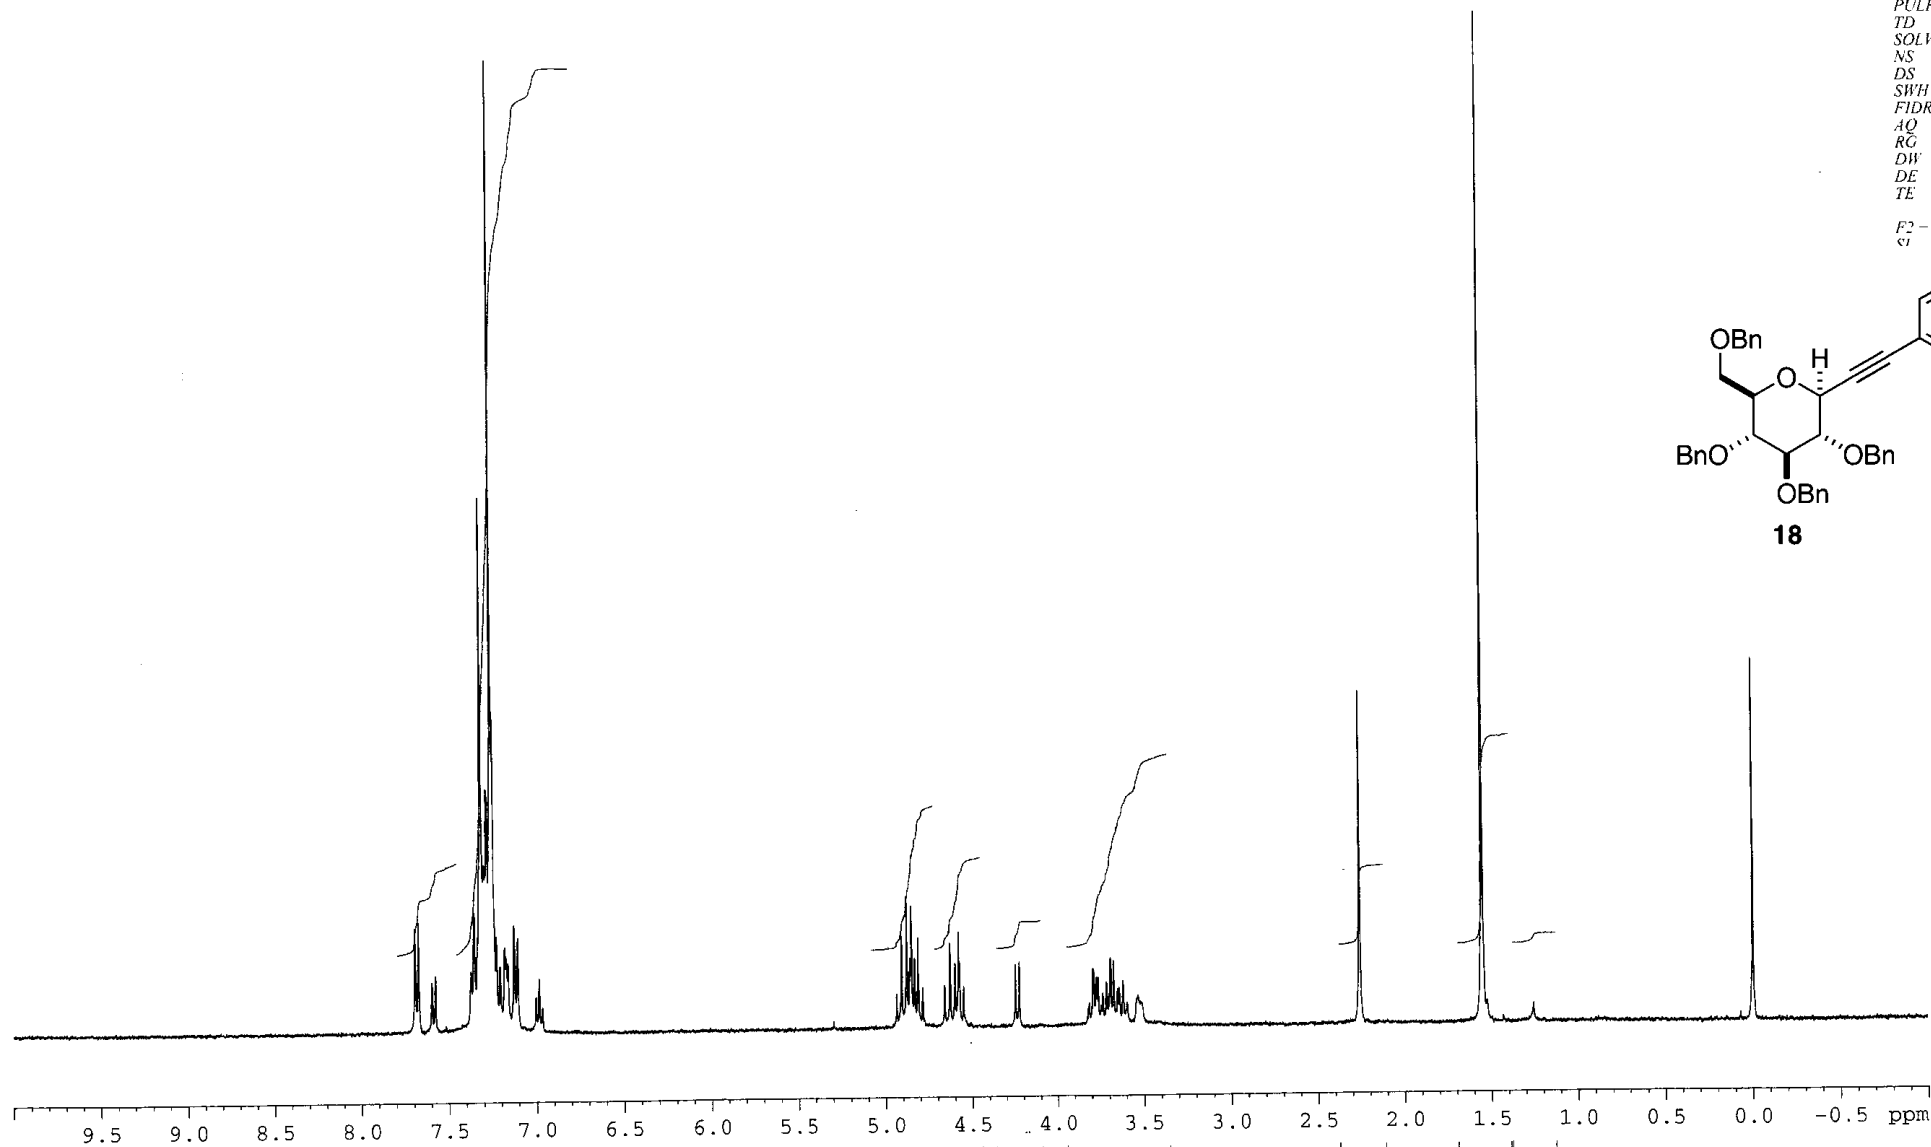

1.000  
9.712

1.572  
0.998  
0.301  
2.109

0.871  
2.287  
0.104

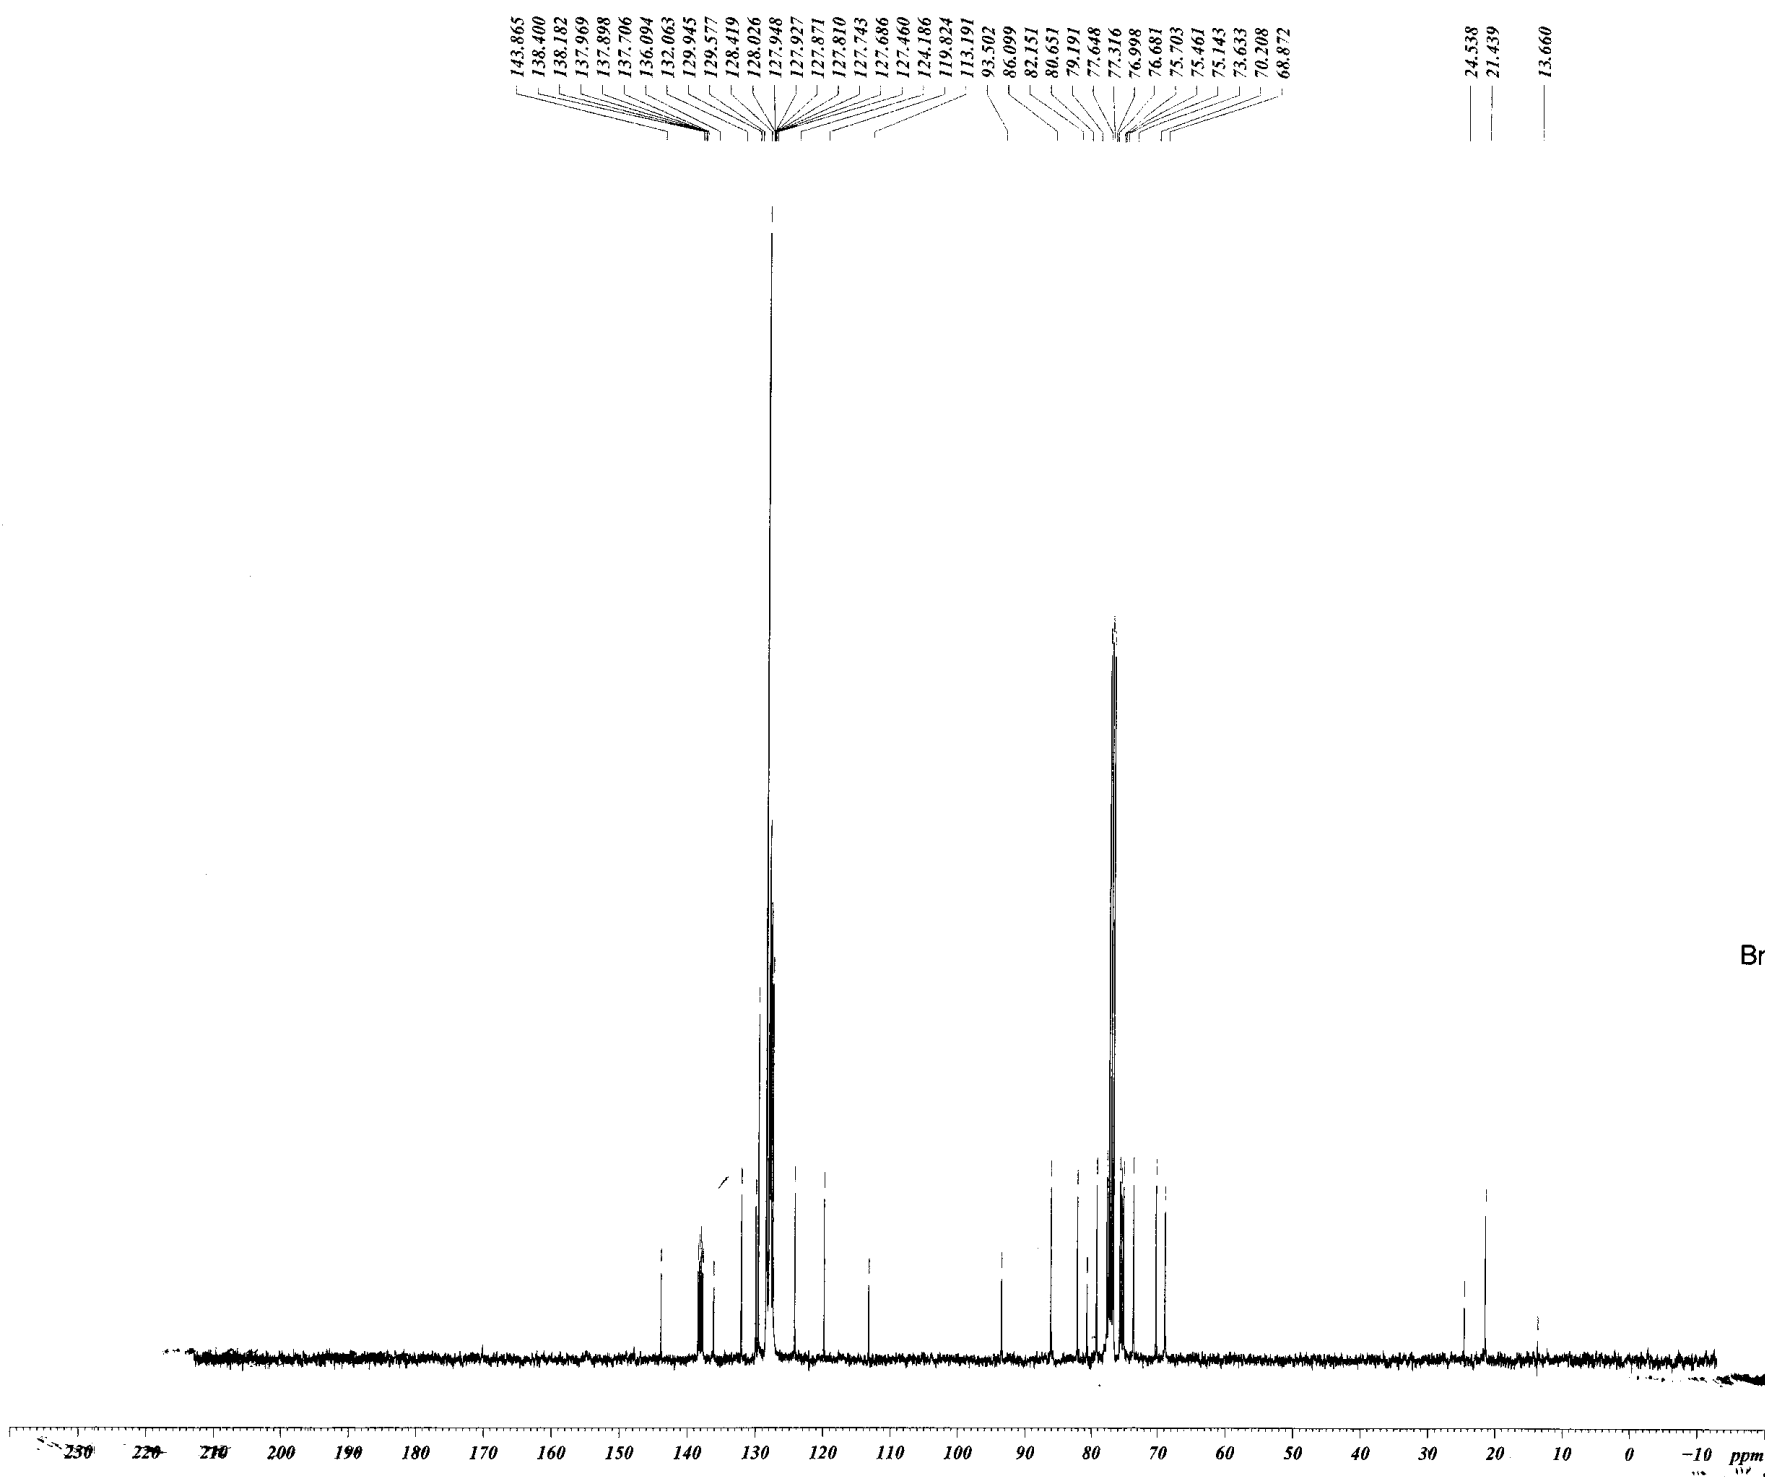

Current Data Parameters  
NAME koide400-1  
EXPNO 37  
PROCNO 1

F2 - Acquisition Parameters  
Date\_ 701030  
Time 20.06  
INSTRUM ARX400  
PROBHD 5 mm QNP 1H  
PULPROG zgpg30  
TD 65536  
SOLVENT CDCL3  
NS 1600  
DS 2  
SWH 22727.273 Hz  
FIDRES 0.346791 Hz  
AQ 1.4418420 sec  
RG 22800  
DW 22.000 usec  
DE 27.50 usec  
TE 300.0 K

F2 - Processing parameters  
SI 32768  
SF 100.6138759 MHz  
WDW EM  
SSB 0  
LB 3.00 Hz  
GB 0  
PC 1.00

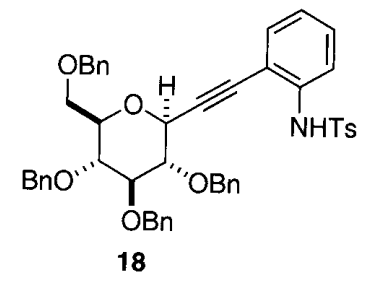

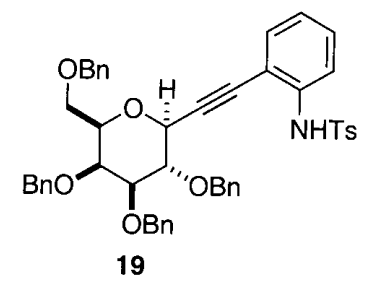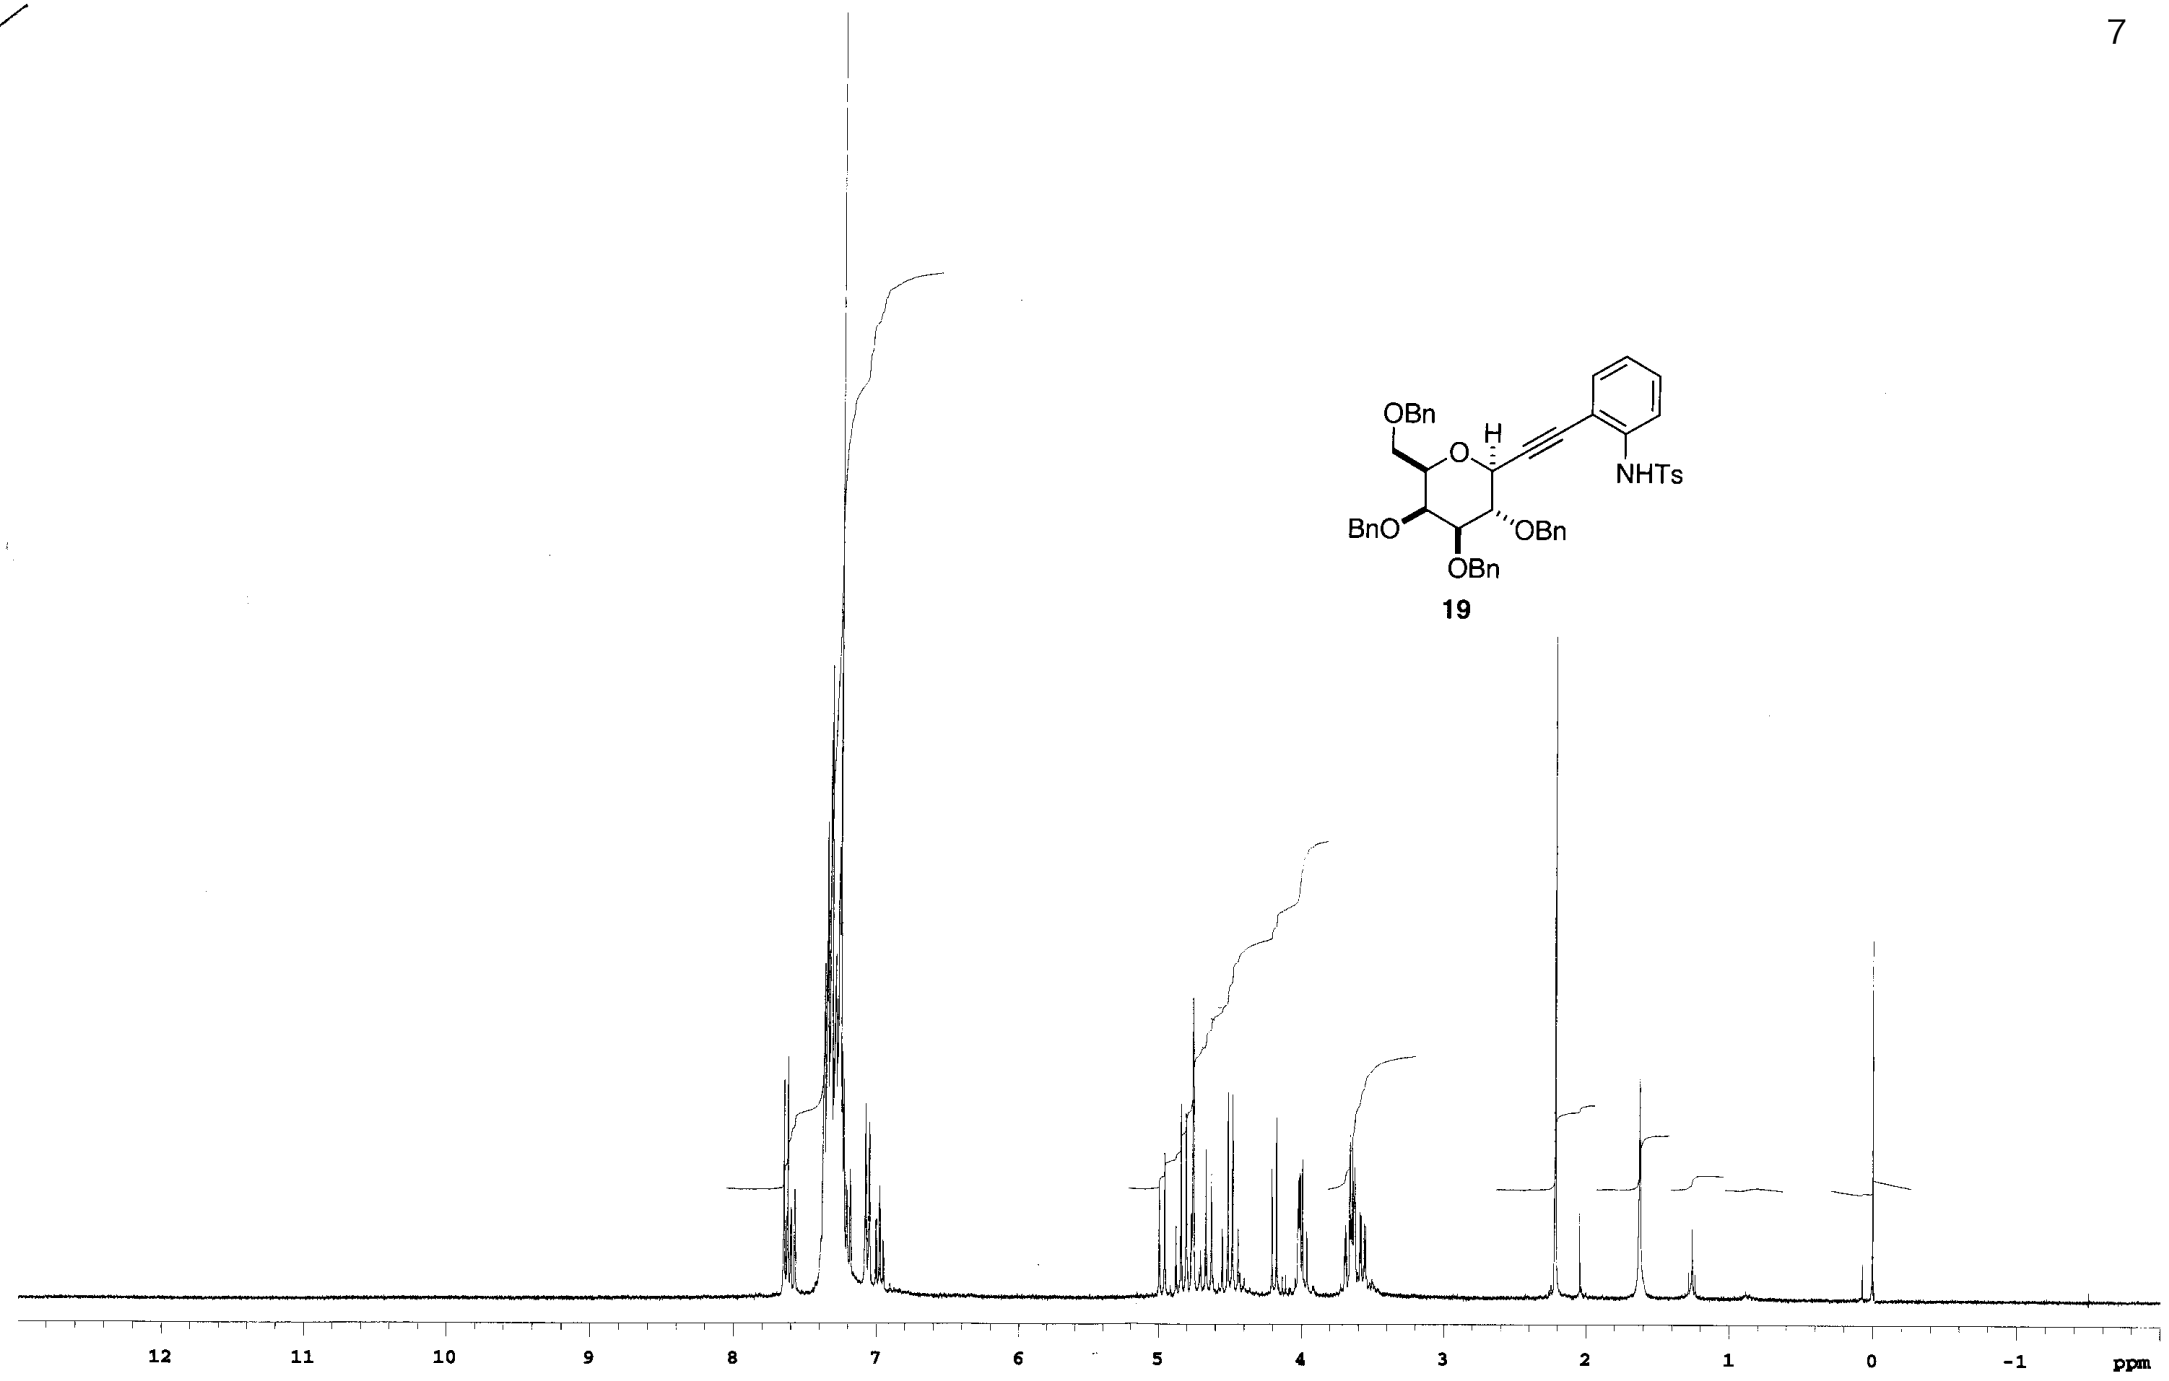

*1H NMR spectrum*

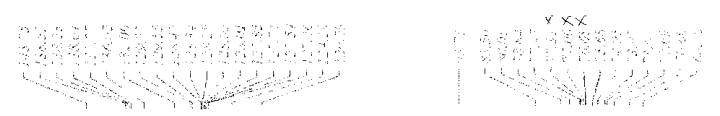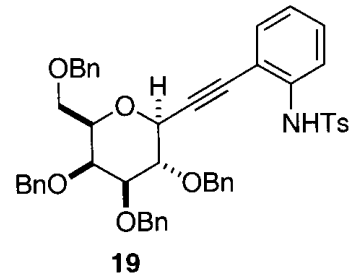

Name: 1,2,3,4-tetra-O-benzyl-5-(3-(NHTs)phenyl)prop-1-yn-1-yl-β-D-ribofuranose  
 SMILES: COc1ccccc1OC[C@@H]2O[C@H](C#CC3=CC=C(C=C3)N(C)C(=O)c4ccccc4)[C@@H](OCc5ccccc5)[C@H](OCc6ccccc6)[C@H]2O  
 MW: 506.54  
 C13: 30  
 H26: 34  
 N2: 2  
 O5: 5

*13C NMR (CDCl3) parameters*

|      |       |
|------|-------|
| 19a  | 77.00 |
| 19b  | 77.00 |
| 19c  | 77.00 |
| 19d  | 77.00 |
| 19e  | 77.00 |
| 19f  | 77.00 |
| 19g  | 77.00 |
| 19h  | 77.00 |
| 19i  | 77.00 |
| 19j  | 77.00 |
| 19k  | 77.00 |
| 19l  | 77.00 |
| 19m  | 77.00 |
| 19n  | 77.00 |
| 19o  | 77.00 |
| 19p  | 77.00 |
| 19q  | 77.00 |
| 19r  | 77.00 |
| 19s  | 77.00 |
| 19t  | 77.00 |
| 19u  | 77.00 |
| 19v  | 77.00 |
| 19w  | 77.00 |
| 19x  | 77.00 |
| 19y  | 77.00 |
| 19z  | 77.00 |
| 19aa | 77.00 |
| 19ab | 77.00 |
| 19ac | 77.00 |
| 19ad | 77.00 |
| 19ae | 77.00 |
| 19af | 77.00 |
| 19ag | 77.00 |
| 19ah | 77.00 |
| 19ai | 77.00 |
| 19aj | 77.00 |
| 19ak | 77.00 |
| 19al | 77.00 |
| 19am | 77.00 |
| 19an | 77.00 |
| 19ao | 77.00 |
| 19ap | 77.00 |
| 19aq | 77.00 |
| 19ar | 77.00 |
| 19as | 77.00 |
| 19at | 77.00 |
| 19au | 77.00 |
| 19av | 77.00 |
| 19aw | 77.00 |
| 19ax | 77.00 |
| 19ay | 77.00 |
| 19az | 77.00 |
| 19ba | 77.00 |
| 19bb | 77.00 |
| 19bc | 77.00 |
| 19bd | 77.00 |
| 19be | 77.00 |
| 19bf | 77.00 |
| 19bg | 77.00 |
| 19bh | 77.00 |
| 19bi | 77.00 |
| 19bj | 77.00 |
| 19bk | 77.00 |
| 19bl | 77.00 |
| 19bm | 77.00 |
| 19bn | 77.00 |
| 19bo | 77.00 |
| 19bp | 77.00 |
| 19bq | 77.00 |
| 19br | 77.00 |
| 19bs | 77.00 |
| 19bt | 77.00 |
| 19bu | 77.00 |
| 19bv | 77.00 |
| 19bw | 77.00 |
| 19bx | 77.00 |
| 19by | 77.00 |
| 19bz | 77.00 |
| 19ca | 77.00 |
| 19cb | 77.00 |
| 19cc | 77.00 |
| 19cd | 77.00 |
| 19ce | 77.00 |
| 19cf | 77.00 |
| 19cg | 77.00 |
| 19ch | 77.00 |
| 19ci | 77.00 |
| 19cj | 77.00 |
| 19ck | 77.00 |
| 19cl | 77.00 |
| 19cm | 77.00 |
| 19cn | 77.00 |
| 19co | 77.00 |
| 19cp | 77.00 |
| 19cq | 77.00 |
| 19cr | 77.00 |
| 19cs | 77.00 |
| 19ct | 77.00 |
| 19cu | 77.00 |
| 19cv | 77.00 |
| 19cw | 77.00 |
| 19cx | 77.00 |
| 19cy | 77.00 |
| 19cz | 77.00 |
| 19da | 77.00 |
| 19db | 77.00 |
| 19dc | 77.00 |
| 19dd | 77.00 |
| 19de | 77.00 |
| 19df | 77.00 |
| 19dg | 77.00 |
| 19dh | 77.00 |
| 19di | 77.00 |
| 19dj | 77.00 |
| 19dk | 77.00 |
| 19dl | 77.00 |
| 19dm | 77.00 |
| 19dn | 77.00 |
| 19do | 77.00 |
| 19dp | 77.00 |
| 19dq | 77.00 |
| 19dr | 77.00 |
| 19ds | 77.00 |
| 19dt | 77.00 |
| 19du | 77.00 |
| 19dv | 77.00 |
| 19dw | 77.00 |
| 19dx | 77.00 |
| 19dy | 77.00 |
| 19dz | 77.00 |
| 19ea | 77.00 |
| 19eb | 77.00 |
| 19ec | 77.00 |
| 19ed | 77.00 |
| 19ee | 77.00 |
| 19ef | 77.00 |
| 19eg | 77.00 |
| 19eh | 77.00 |
| 19ei | 77.00 |
| 19ej | 77.00 |
| 19ek | 77.00 |
| 19el | 77.00 |
| 19em | 77.00 |
| 19en | 77.00 |
| 19eo | 77.00 |
| 19ep | 77.00 |
| 19eq | 77.00 |
| 19er | 77.00 |
| 19es | 77.00 |
| 19et | 77.00 |
| 19eu | 77.00 |
| 19ev | 77.00 |
| 19ew | 77.00 |
| 19ex | 77.00 |
| 19ey | 77.00 |
| 19ez | 77.00 |
| 19fa | 77.00 |
| 19fb | 77.00 |
| 19fc | 77.00 |
| 19fd | 77.00 |
| 19fe | 77.00 |
| 19ff | 77.00 |
| 19fg | 77.00 |
| 19fh | 77.00 |
| 19fi | 77.00 |
| 19fj | 77.00 |
| 19fk | 77.00 |
| 19fl | 77.00 |
| 19fm | 77.00 |
| 19fn | 77.00 |
| 19fo | 77.00 |
| 19fp | 77.00 |
| 19fq | 77.00 |
| 19fr | 77.00 |
| 19fs | 77.00 |
| 19ft | 77.00 |
| 19fu | 77.00 |
| 19fv | 77.00 |
| 19fw | 77.00 |
| 19fx | 77.00 |
| 19fy | 77.00 |
| 19fz | 77.00 |
| 19ga | 77.00 |
| 19gb | 77.00 |
| 19gc | 77.00 |
| 19gd | 77.00 |
| 19ge | 77.00 |
| 19gf | 77.00 |
| 19gg | 77.00 |
| 19gh | 77.00 |
| 19gi | 77.00 |
| 19gj | 77.00 |
| 19gk | 77.00 |
| 19gl | 77.00 |
| 19gm | 77.00 |
| 19gn | 77.00 |
| 19go | 77.00 |
| 19gp | 77.00 |
| 19gq | 77.00 |
| 19gr | 77.00 |
| 19gs | 77.00 |
| 19gt | 77.00 |
| 19gu | 77.00 |
| 19gv | 77.00 |
| 19gw | 77.00 |
| 19gx | 77.00 |
| 19gy | 77.00 |
| 19gz | 77.00 |
| 19ha | 77.00 |
| 19hb | 77.00 |
| 19hc | 77.00 |
| 19hd | 77.00 |
| 19he | 77.00 |
| 19hf | 77.00 |
| 19hg | 77.00 |
| 19hh | 77.00 |
| 19hi | 77.00 |
| 19hj | 77.00 |
| 19hk | 77.00 |
| 19hl | 77.00 |
| 19hm | 77.00 |
| 19hn | 77.00 |
| 19ho | 77.00 |
| 19hp | 77.00 |
| 19hq | 77.00 |
| 19hr | 77.00 |
| 19hs | 77.00 |
| 19ht | 77.00 |
| 19hu | 77.00 |
| 19hv | 77.00 |
| 19hw | 77.00 |
| 19hx | 77.00 |
| 19hy | 77.00 |
| 19hz | 77.00 |
| 19ia | 77.00 |
| 19ib | 77.00 |
| 19ic | 77.00 |
| 19id | 77.00 |
| 19ie | 77.00 |
| 19if | 77.00 |
| 19ig | 77.00 |
| 19ih | 77.00 |
| 19ii | 77.00 |
| 19ij | 77.00 |
| 19ik | 77.00 |
| 19il | 77.00 |
| 19im | 77.00 |
| 19in | 77.00 |
| 19io | 77.00 |
| 19ip | 77.00 |
| 19iq | 77.00 |
| 19ir | 77.00 |
| 19is | 77.00 |
| 19it | 77.00 |
| 19iu | 77.00 |
| 19iv | 77.00 |
| 19iw | 77.00 |
| 19ix | 77.00 |
| 19iy | 77.00 |
| 19iz | 77.00 |
| 19ja | 77.00 |
| 19jb | 77.00 |
| 19jc | 77.00 |
| 19jd | 77.00 |
| 19je | 77.00 |
| 19jf | 77.00 |
| 19jg | 77.00 |
| 19jh | 77.00 |
| 19ji | 77.00 |
| 19jj | 77.00 |
| 19jk | 77.00 |
| 19jl | 77.00 |
| 19jm | 77.00 |
| 19jn | 77.00 |
| 19jo | 77.00 |
| 19jp | 77.00 |
| 19jq | 77.00 |
| 19jr | 77.00 |
| 19js | 77.00 |
| 19jt | 77.00 |
| 19ju | 77.00 |
| 19jv | 77.00 |
| 19jw | 77.00 |
| 19jx | 77.00 |
| 19jy | 77.00 |
| 19jz | 77.00 |
| 19ka | 77.00 |
| 19kb | 77.00 |
| 19kc | 77.00 |
| 19kd | 77.00 |
| 19ke | 77.00 |
| 19kf | 77.00 |
| 19kg | 77.00 |
| 19kh | 77.00 |
| 19ki | 77.00 |
| 19kj | 77.00 |
| 19kk | 77.00 |
| 19kl | 77.00 |
| 19km | 77.00 |
| 19kn | 77.00 |
| 19ko | 77.00 |
| 19kp | 77.00 |
| 19kq | 77.00 |
| 19kr | 77.00 |
| 19ks | 77.00 |
| 19kt | 77.00 |
| 19ku | 77.00 |
| 19kv | 77.00 |
| 19kw | 77.00 |
| 19kx | 77.00 |
| 19ky | 77.00 |
| 19kz | 77.00 |
| 19la | 77.00 |
| 19lb | 77.00 |
| 19lc | 77.00 |
| 19ld | 77.00 |
| 19le | 77.00 |
| 19lf | 77.00 |
| 19lg | 77.00 |
| 19lh | 77.00 |
| 19li | 77.00 |
| 19lj | 77.00 |
| 19lk | 77.00 |
| 19ll | 77.00 |
| 19lm | 77.00 |
| 19ln | 77.00 |
| 19lo | 77.00 |
| 19lp | 77.00 |
| 19lq | 77.00 |
| 19lr | 77.00 |
| 19ls | 77.00 |
| 19lt | 77.00 |
| 19lu | 77.00 |
| 19lv | 77.00 |
| 19lw | 77.00 |
| 19lx | 77.00 |
| 19ly | 77.00 |
| 19lz | 77.00 |
| 19ma | 77.00 |
| 19mb | 77.00 |
| 19mc | 77.00 |
| 19md | 77.00 |
| 19me | 77.00 |
| 19mf | 77.00 |
| 19mg | 77.00 |
| 19mh | 77.00 |
| 19mi | 77.00 |
| 19mj | 77.00 |
| 19mk | 77.00 |
| 19ml | 77.00 |
| 19mm | 77.00 |
| 19mn | 77.00 |
| 19mo | 77.00 |
| 19mp | 77.00 |
| 19mq | 77.00 |
| 19mr | 77.00 |
| 19ms | 77.00 |
| 19mt | 77.00 |
| 19mu | 77.00 |
| 19mv | 77.00 |
| 19mw | 77.00 |
| 19mx | 77.00 |
| 19my | 77.00 |
| 19mz | 77.00 |
| 19na | 77.00 |
| 19nb | 77.00 |
| 19nc | 77.00 |
| 19nd | 77.00 |
| 19ne | 77.00 |
| 19nf | 77.00 |
| 19ng | 77.00 |
| 19nh | 77.00 |
| 19ni | 77.00 |
| 19nj | 77.00 |
| 19nk | 77.00 |
| 19nl | 77.00 |
| 19nm | 77.00 |
| 19nn | 77.00 |
| 19no | 77.00 |
| 19np | 77.00 |
| 19nq | 77.00 |
| 19nr | 77.00 |
| 19ns | 77.00 |
| 19nt | 77.00 |
| 19nu | 77.00 |
| 19nv | 77.00 |
| 19nw | 77.00 |
| 19nx | 77.00 |
| 19ny | 77.00 |
| 19nz | 77.00 |
| 19oa | 77.00 |
| 19ob | 77.00 |
| 19oc | 77.00 |
| 19od | 77.00 |
| 19oe | 77.00 |
| 19of | 77.00 |
| 19og | 77.00 |
| 19oh | 77.00 |
| 19oi | 77.00 |
| 19oj | 77.00 |
| 19ok | 77.00 |
| 19ol | 77.00 |
| 19om | 77.00 |
| 19on | 77.00 |
| 19oo | 77.00 |
| 19op | 77.00 |
| 19oq | 77.00 |
| 19or | 77.00 |
| 19os | 77.00 |
| 19ot | 77.00 |
| 19ou | 77.00 |
| 19ov | 77.00 |
| 19ow | 77.00 |
| 19ox | 77.00 |
| 19oy | 77.00 |
| 19oz | 77.00 |
| 19pa | 77.00 |
| 19pb | 77.00 |
| 19pc | 77.00 |
| 19pd | 77.00 |
| 19pe | 77.00 |
| 19pf | 77.00 |
| 19pg | 77.00 |
| 19ph | 77.00 |
| 19pi | 77.00 |
| 19pj | 77.00 |
| 19pk | 77.00 |
| 19pl | 77.00 |
| 19pm | 77.00 |
| 19pn | 77.00 |
| 19po | 77.00 |
| 19pp | 77.00 |
| 19pq | 77.00 |
| 19pr | 77.00 |
| 19ps | 77.00 |
| 19pt | 77.00 |
| 19pu | 77.00 |
| 19pv | 77.00 |
| 19pw | 77.00 |
| 19px | 77.00 |
| 19py | 77.00 |
| 19pz | 77.00 |
| 19qa | 77.00 |
| 19qb | 77.00 |
| 19qc | 77.00 |
| 19qd | 77.00 |
| 19qe | 77.00 |
| 19qf | 77.00 |
| 19qg | 77.00 |
| 19qh | 77.00 |
| 19qi | 77.00 |
| 19qj | 77.00 |
| 19qk | 77.00 |
| 19ql | 77.00 |
| 19qm | 77.00 |
| 19qn | 77.00 |
| 19qo | 77.00 |
| 19qp | 77.00 |
| 19qq | 77.00 |
| 19qr | 77.00 |
| 19qs | 77.00 |
| 19qt | 77.00 |
| 19qu | 77.00 |
| 19qv | 77.00 |
| 19qw | 77.00 |
| 19qx | 77.00 |
| 19qy | 77.00 |
| 19qz | 77.00 |
| 19ra | 77.00 |
| 19rb | 77.00 |
| 19rc | 77.00 |
| 19rd | 77.00 |
| 19re | 77.00 |
| 19rf | 77.00 |
| 19rg | 77.00 |
| 19rh | 77.00 |
| 19ri | 77.00 |
| 19rj | 77.00 |
| 19rk | 77.00 |
| 19rl | 77.00 |
| 19rm | 77.00 |
| 19rn | 77.00 |
| 19ro | 77.00 |
| 19rp | 77.00 |
| 19rq | 77.00 |
| 19rr | 77.00 |
| 19rs | 77.00 |
| 19rt | 77.00 |
| 19ru | 77.00 |
| 19rv | 77.00 |
| 19rw | 77.00 |
| 19rx | 77.00 |
| 19ry | 77.00 |
| 19rz | 77.00 |
| 19sa | 77.00 |
| 19sb | 77.00 |
| 19sc | 77.00 |
| 19sd | 77.00 |
| 19se | 77.00 |
| 19sf | 77.00 |
| 19sg | 77.00 |
| 19sh | 77.00 |
| 19si | 77.00 |
| 19sj | 77.00 |
| 19sk | 77.00 |
| 19sl | 77.00 |
| 19sm | 77.00 |
| 19sn | 77.00 |
| 19so | 77.00 |
| 19sp | 77.00 |
| 19sq | 77.00 |
| 19sr | 77.00 |
| 19ss | 77.00 |
| 19st | 77.00 |
| 19su |       |



```
expl stdih
SAMPLE          DEC. & VT
date    Dec 15 04  dfrq    299.957
solvent  CDCl3    dn      H1
file     exp     dof     -10000.0
ACQUISITION    dm      nnn
sfrq     299.967 dmm     c
tn       H1     dmf     200
at       3.748   PROCESSING
np       33728  wtfile
sw       4499.5 proc     ft
fb       2250  fn      not used
bs       16
pw       6.0   werr     react
dl       0.252 wexp autolist('ent-
tof      149.3  erJ', 'hl_process_J-
nt       32    396')
ct       32   wbs
alock    n     wat
gain     not used
FLAGS
il        n
in        n
dp        y
DISPLAY
sp        -600.5
wp        4499.5
vs        4709
sc        0
wc        400
hzmm     11.25
is       12852.75
rf1      600.5
rfp      0
th       8
ins     1.000
ai cdc ph
```

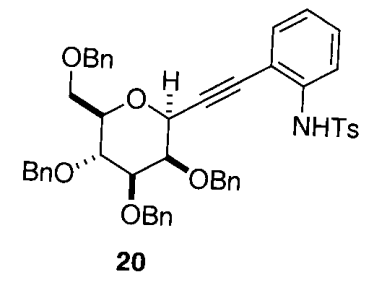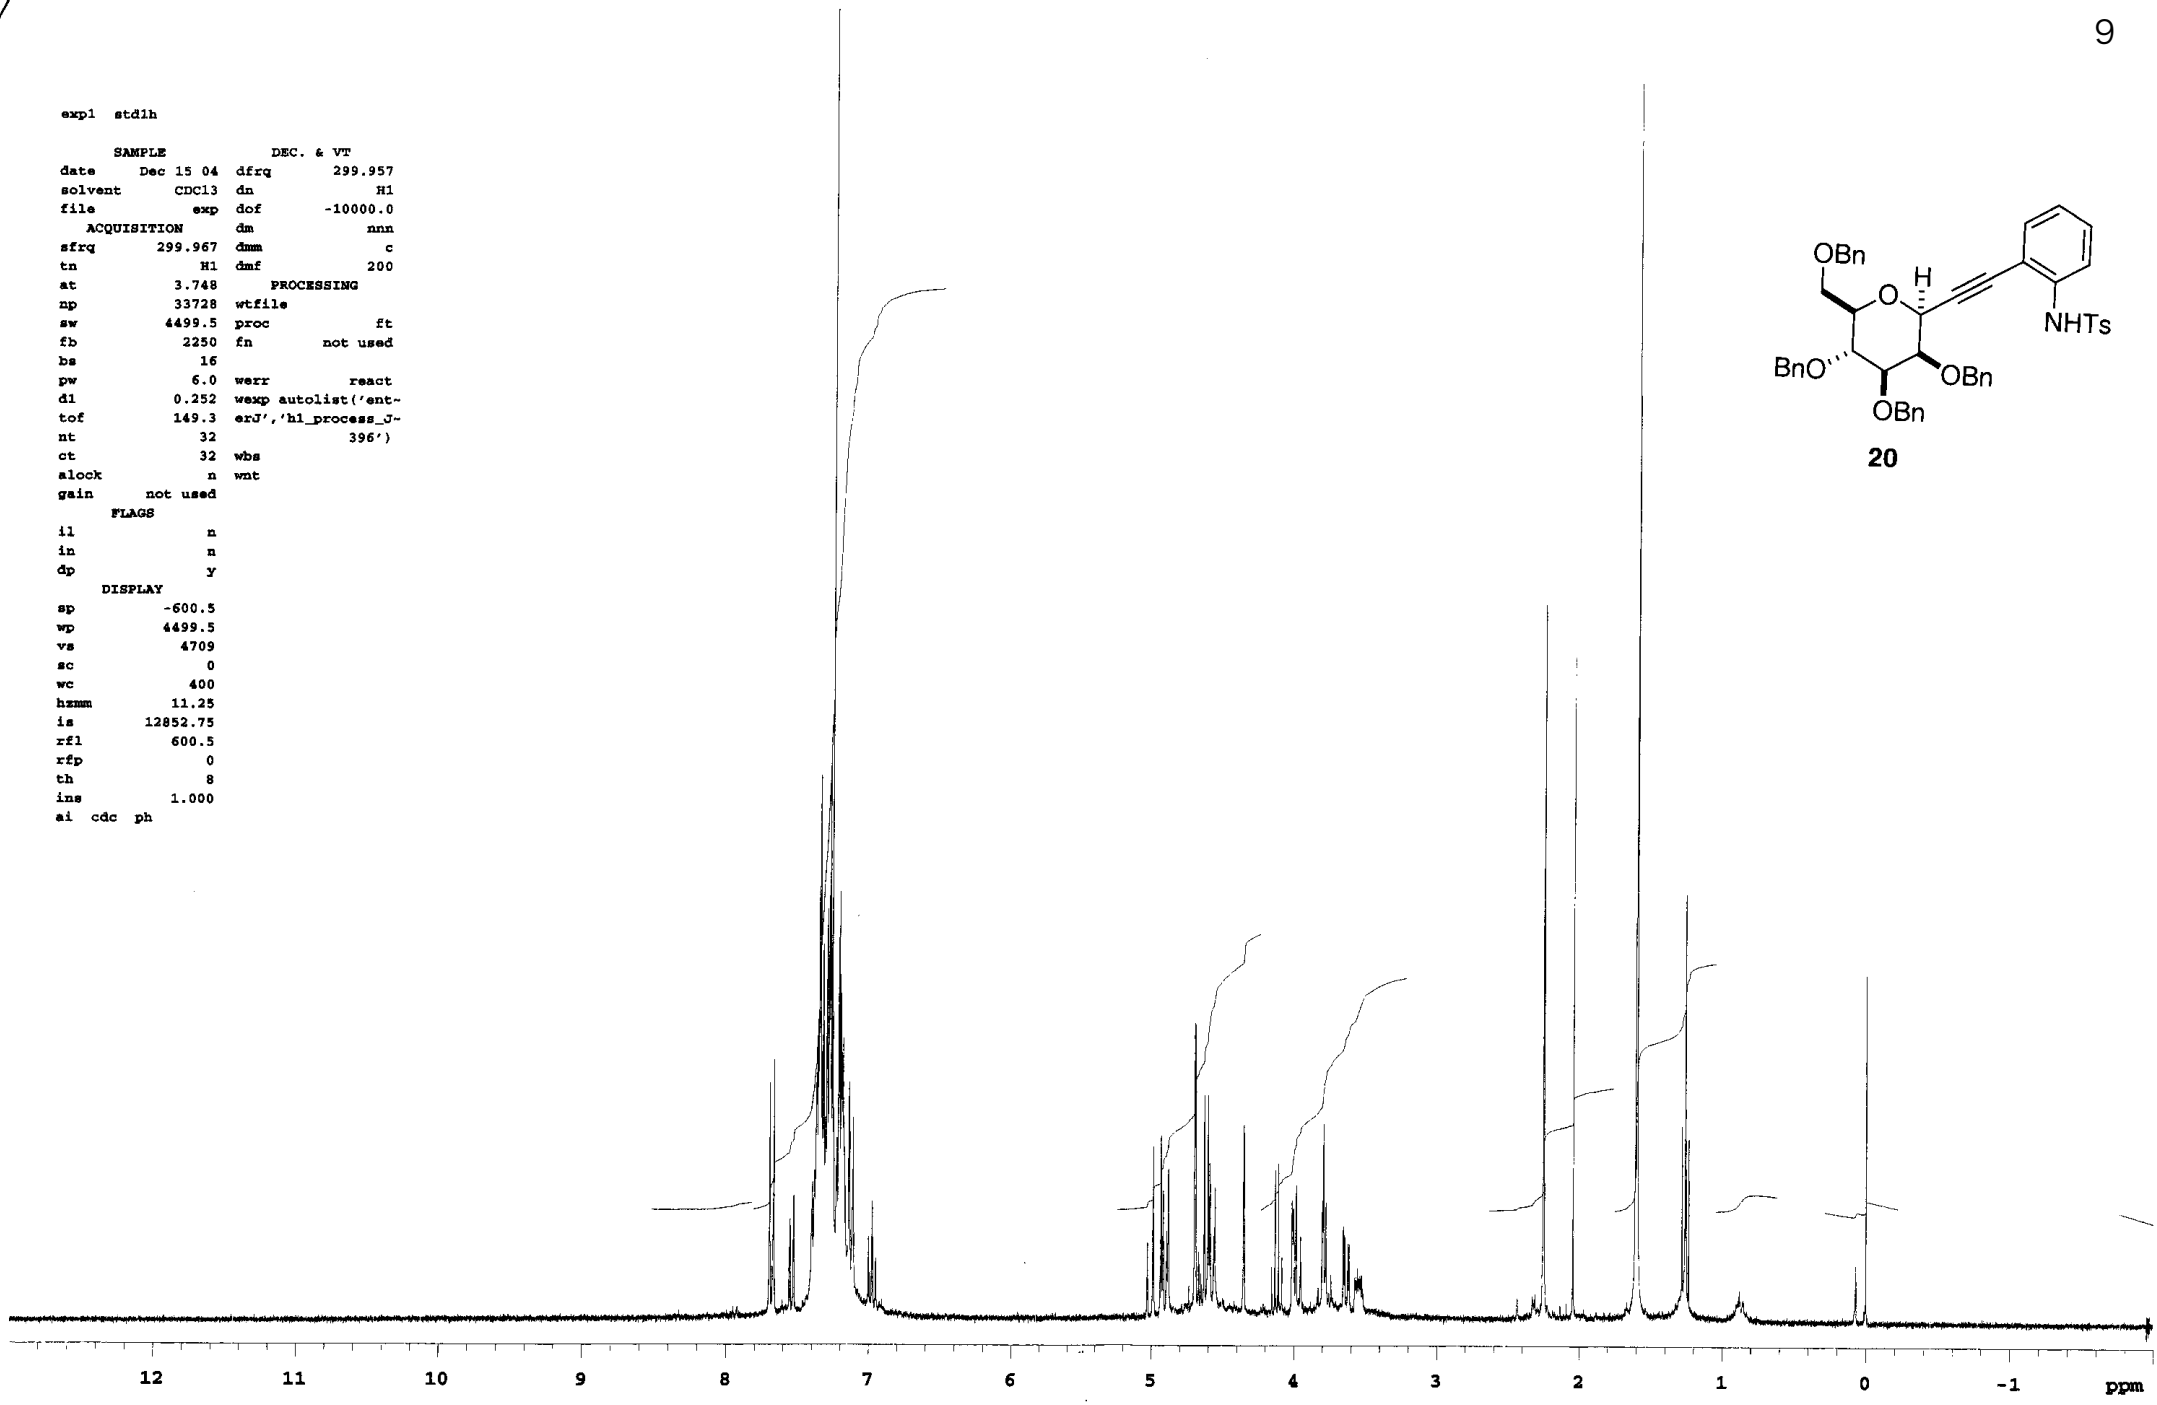

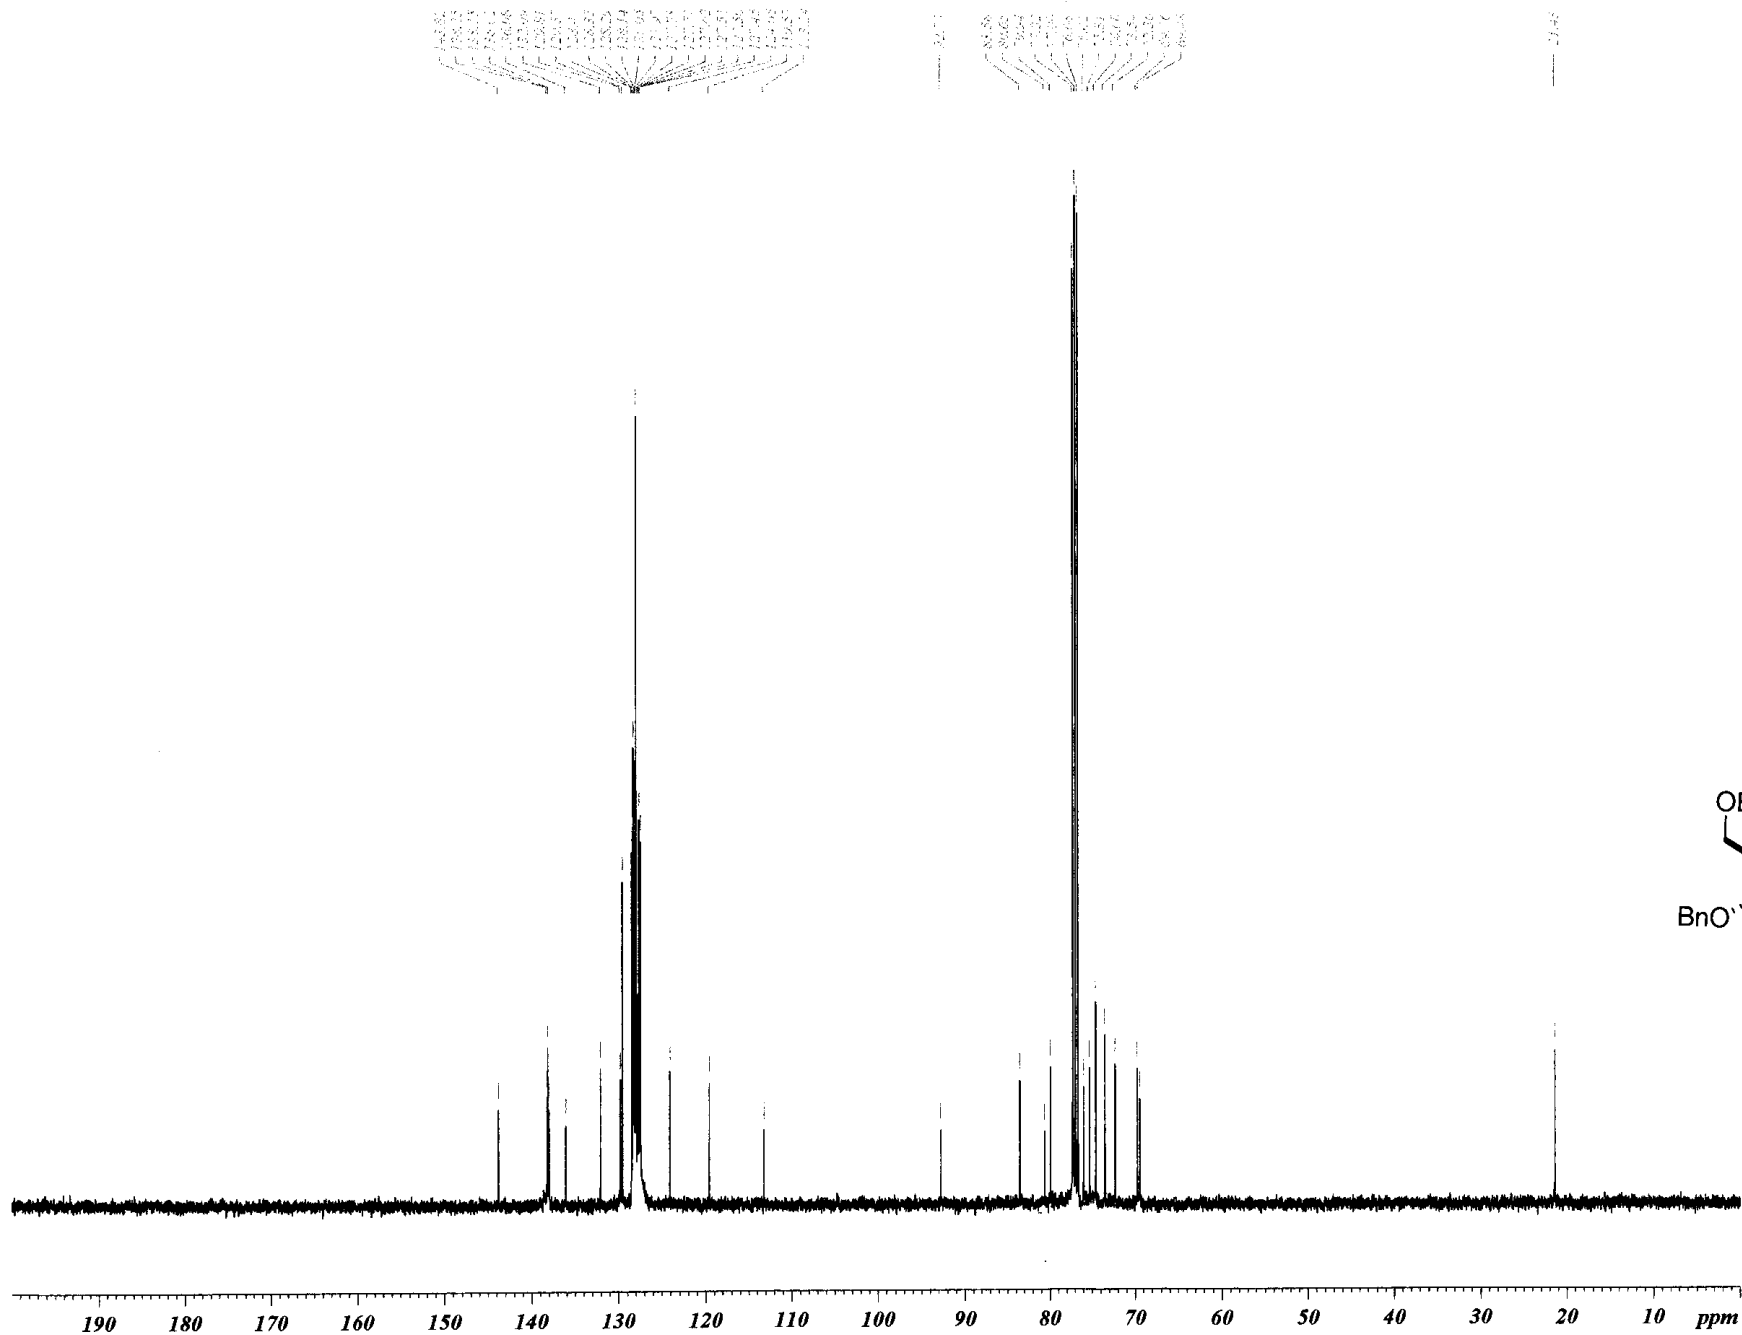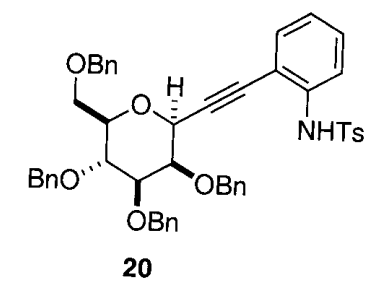

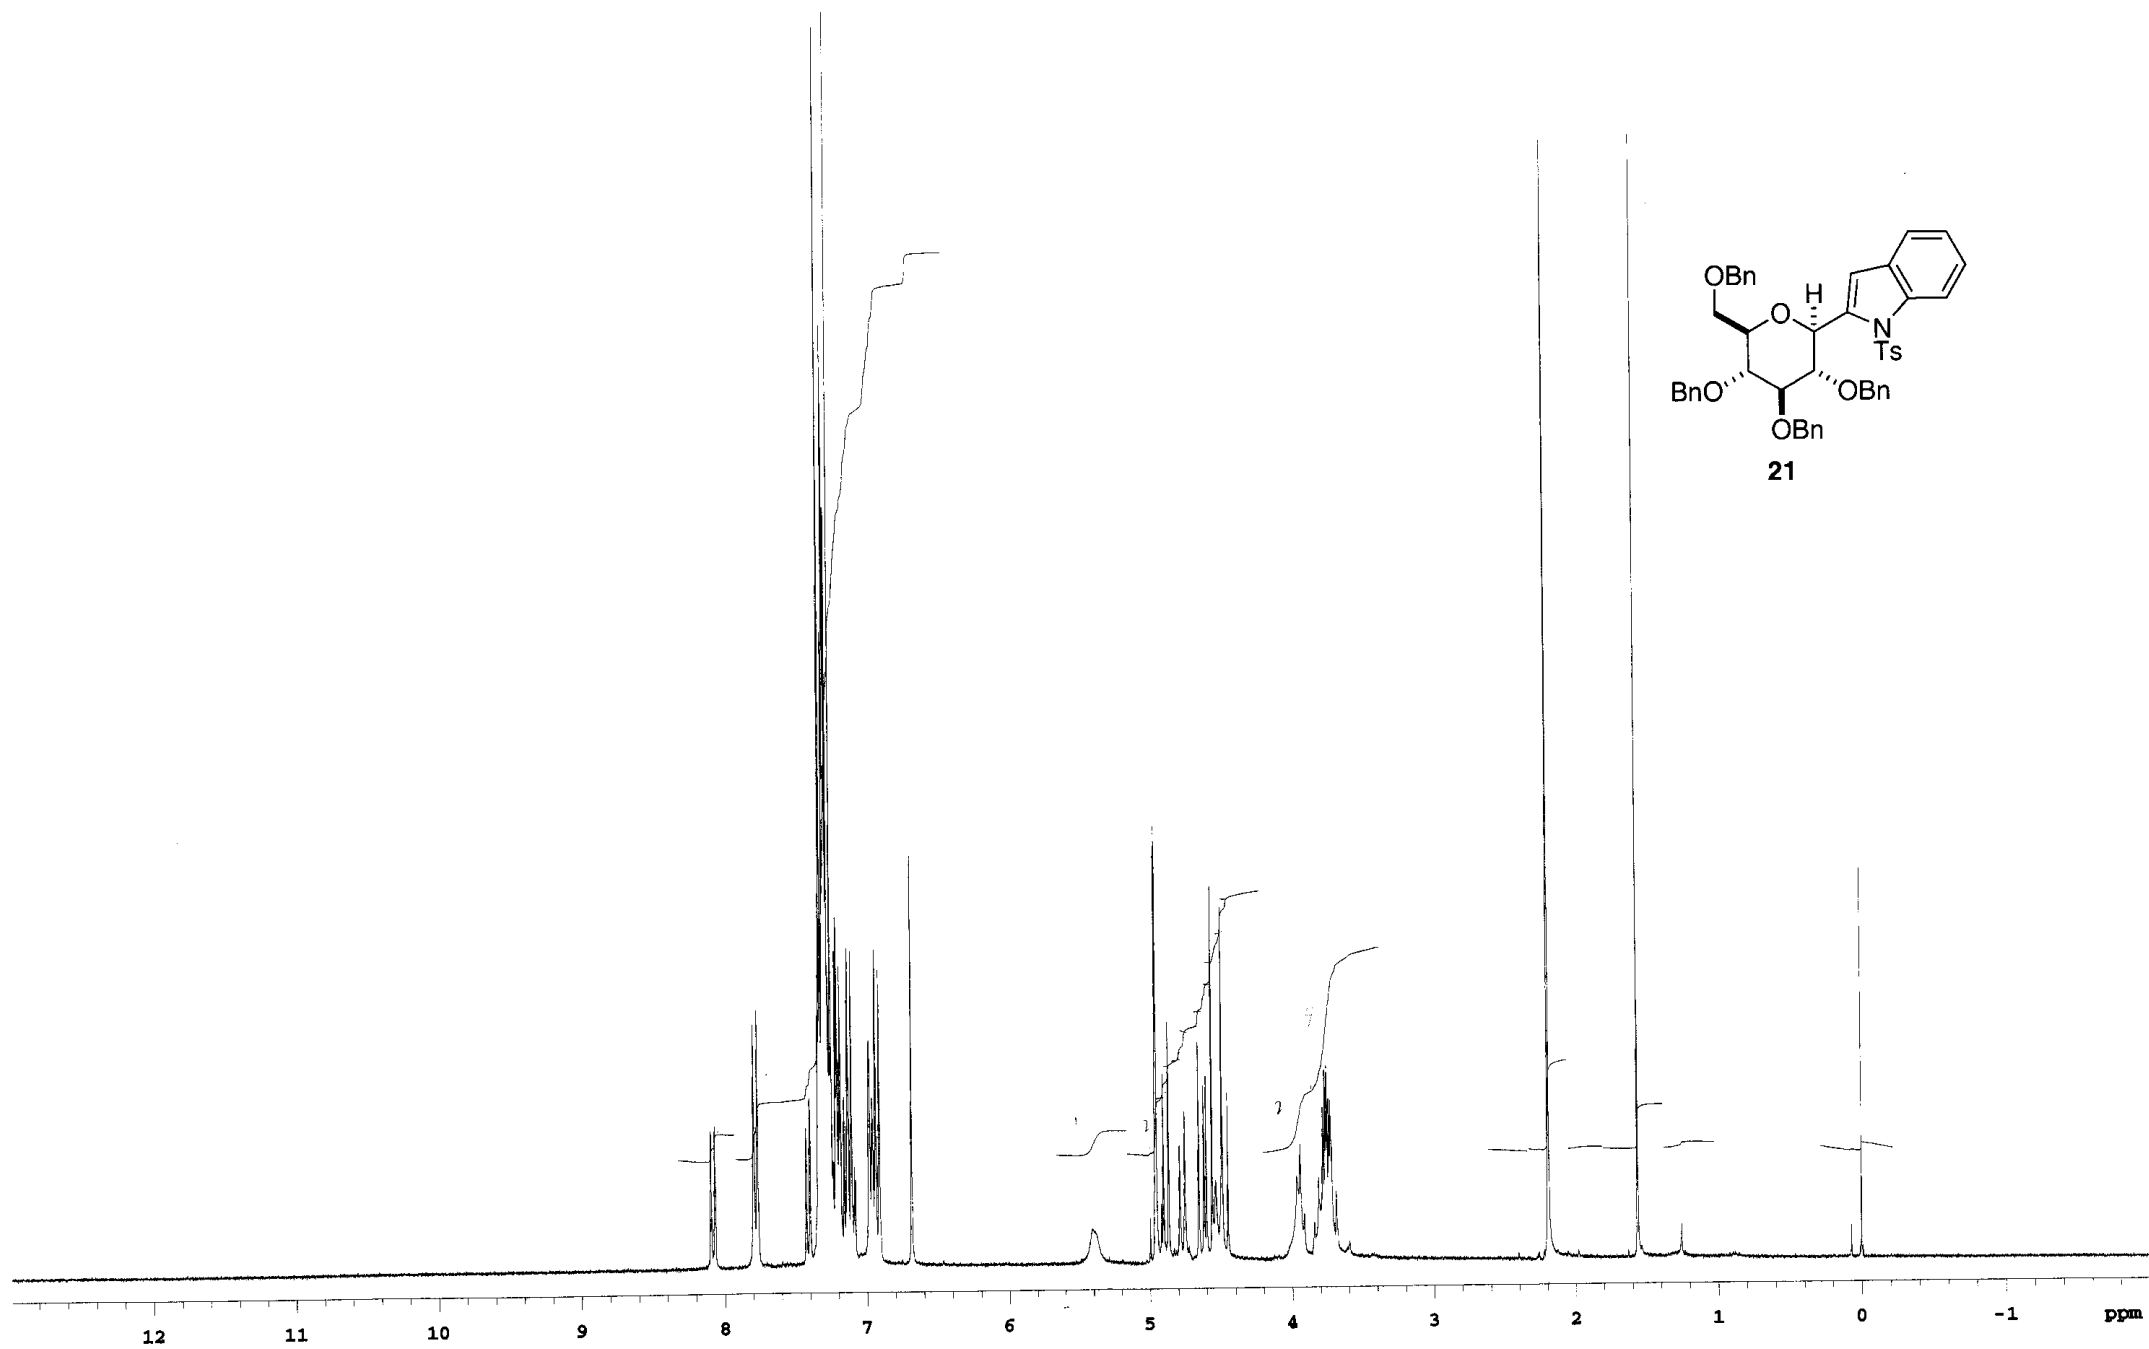

Solvent: CDCl<sub>3</sub>  
 Ambient temperature  
 GEMINI-300 "varian"  
 PULSE SEQUENCE  
 Pulse 35.0 degrees  
 Acq. time 1.697 sec  
 Width 18858.5 Hz  
 384 repetitions  
 OBSERVE C13, 75.4264075 MHz  
 DECOUPLE H1, 299.9672195 MHz  
 Power 30 dB  
 continuously on  
 WALTZ-16 modulated  
 DATA PROCESSING  
 Line broadening 2.0 Hz  
 FT size 65536  
 Total time 10 minutes

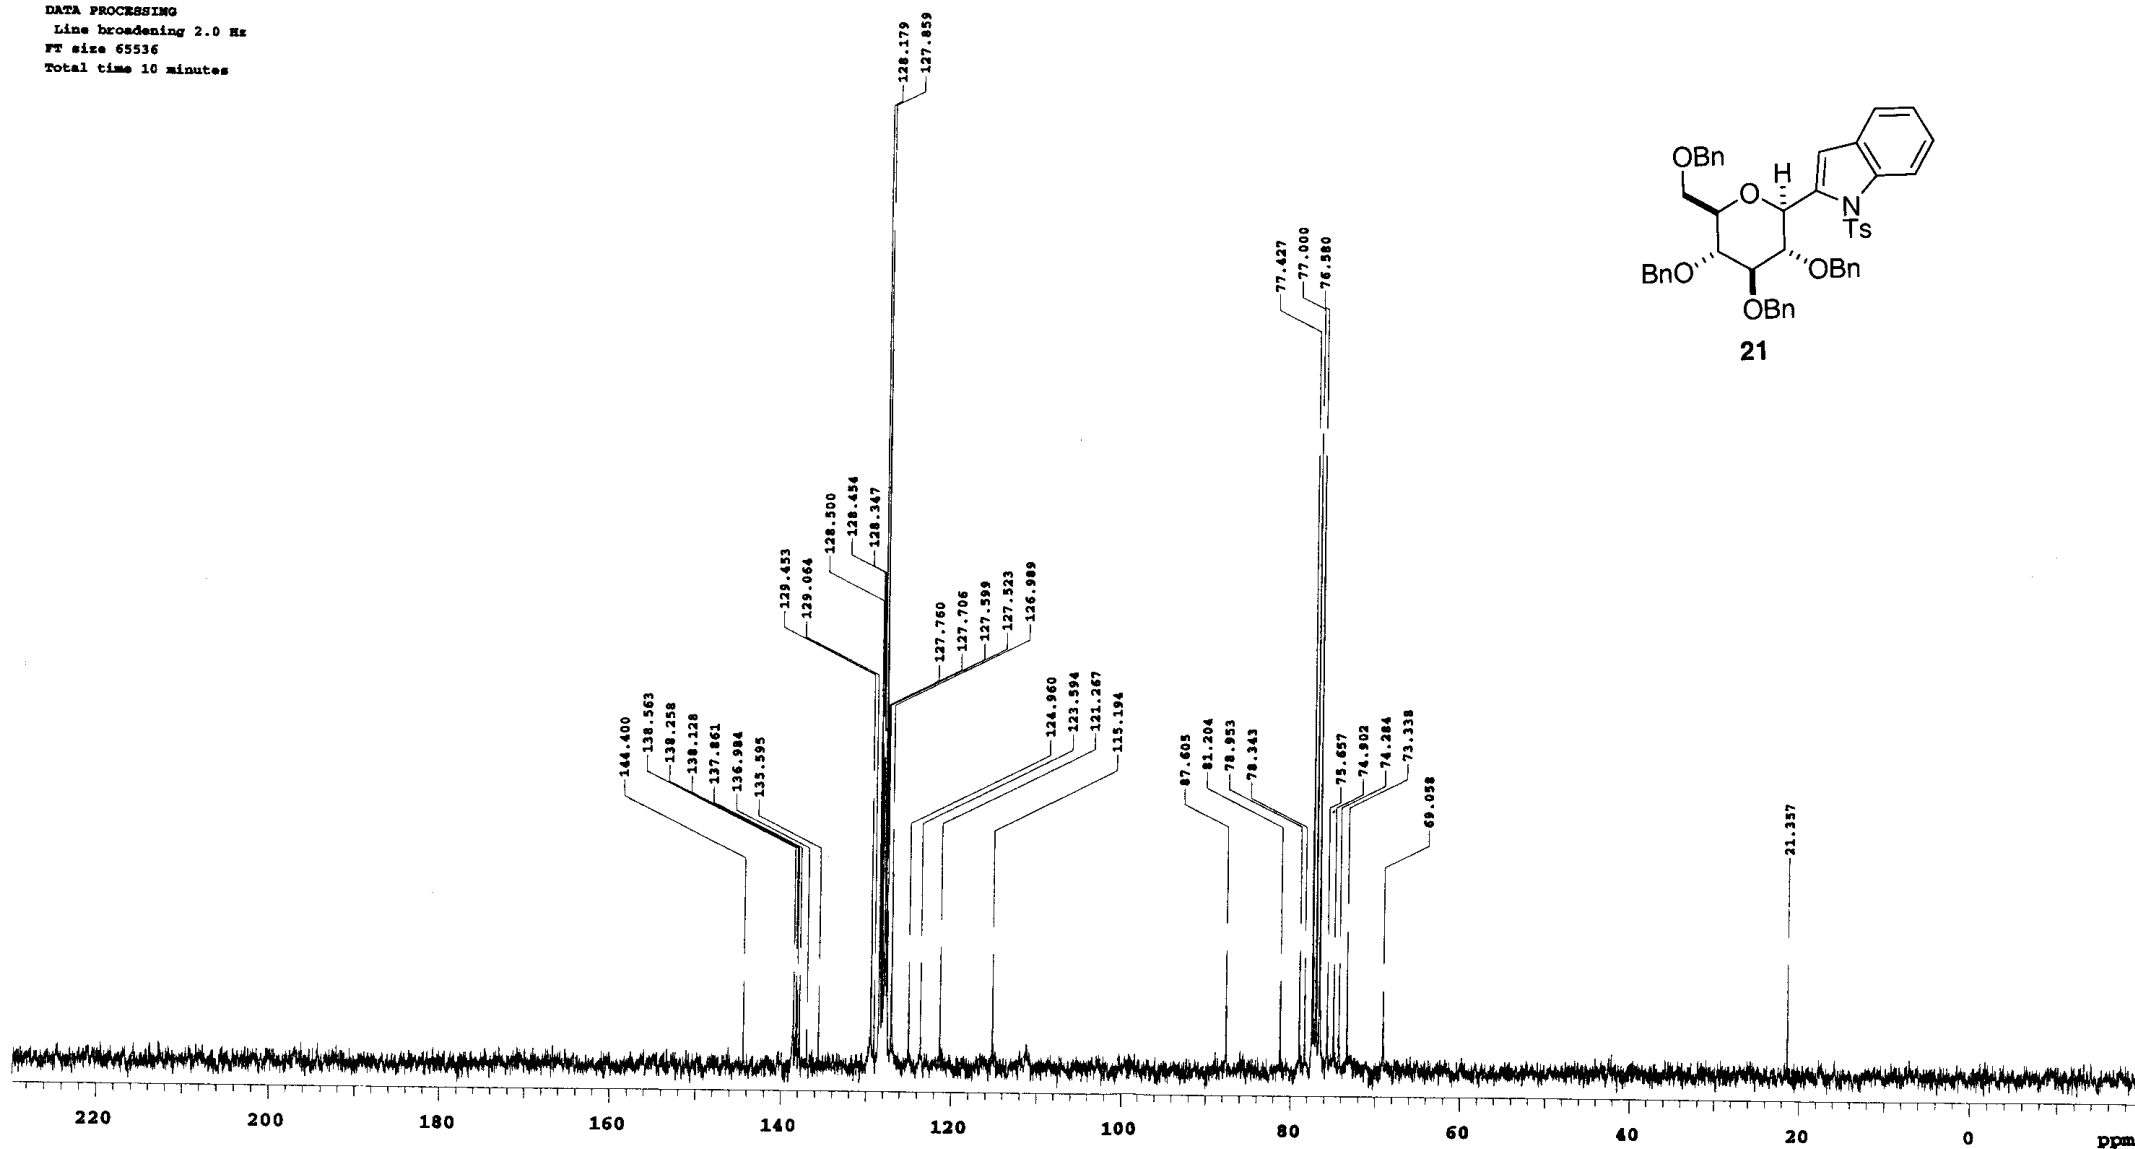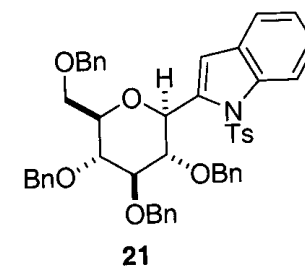

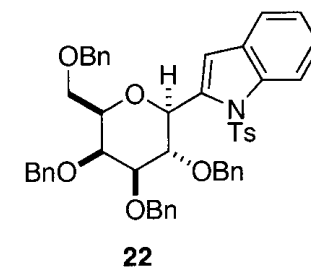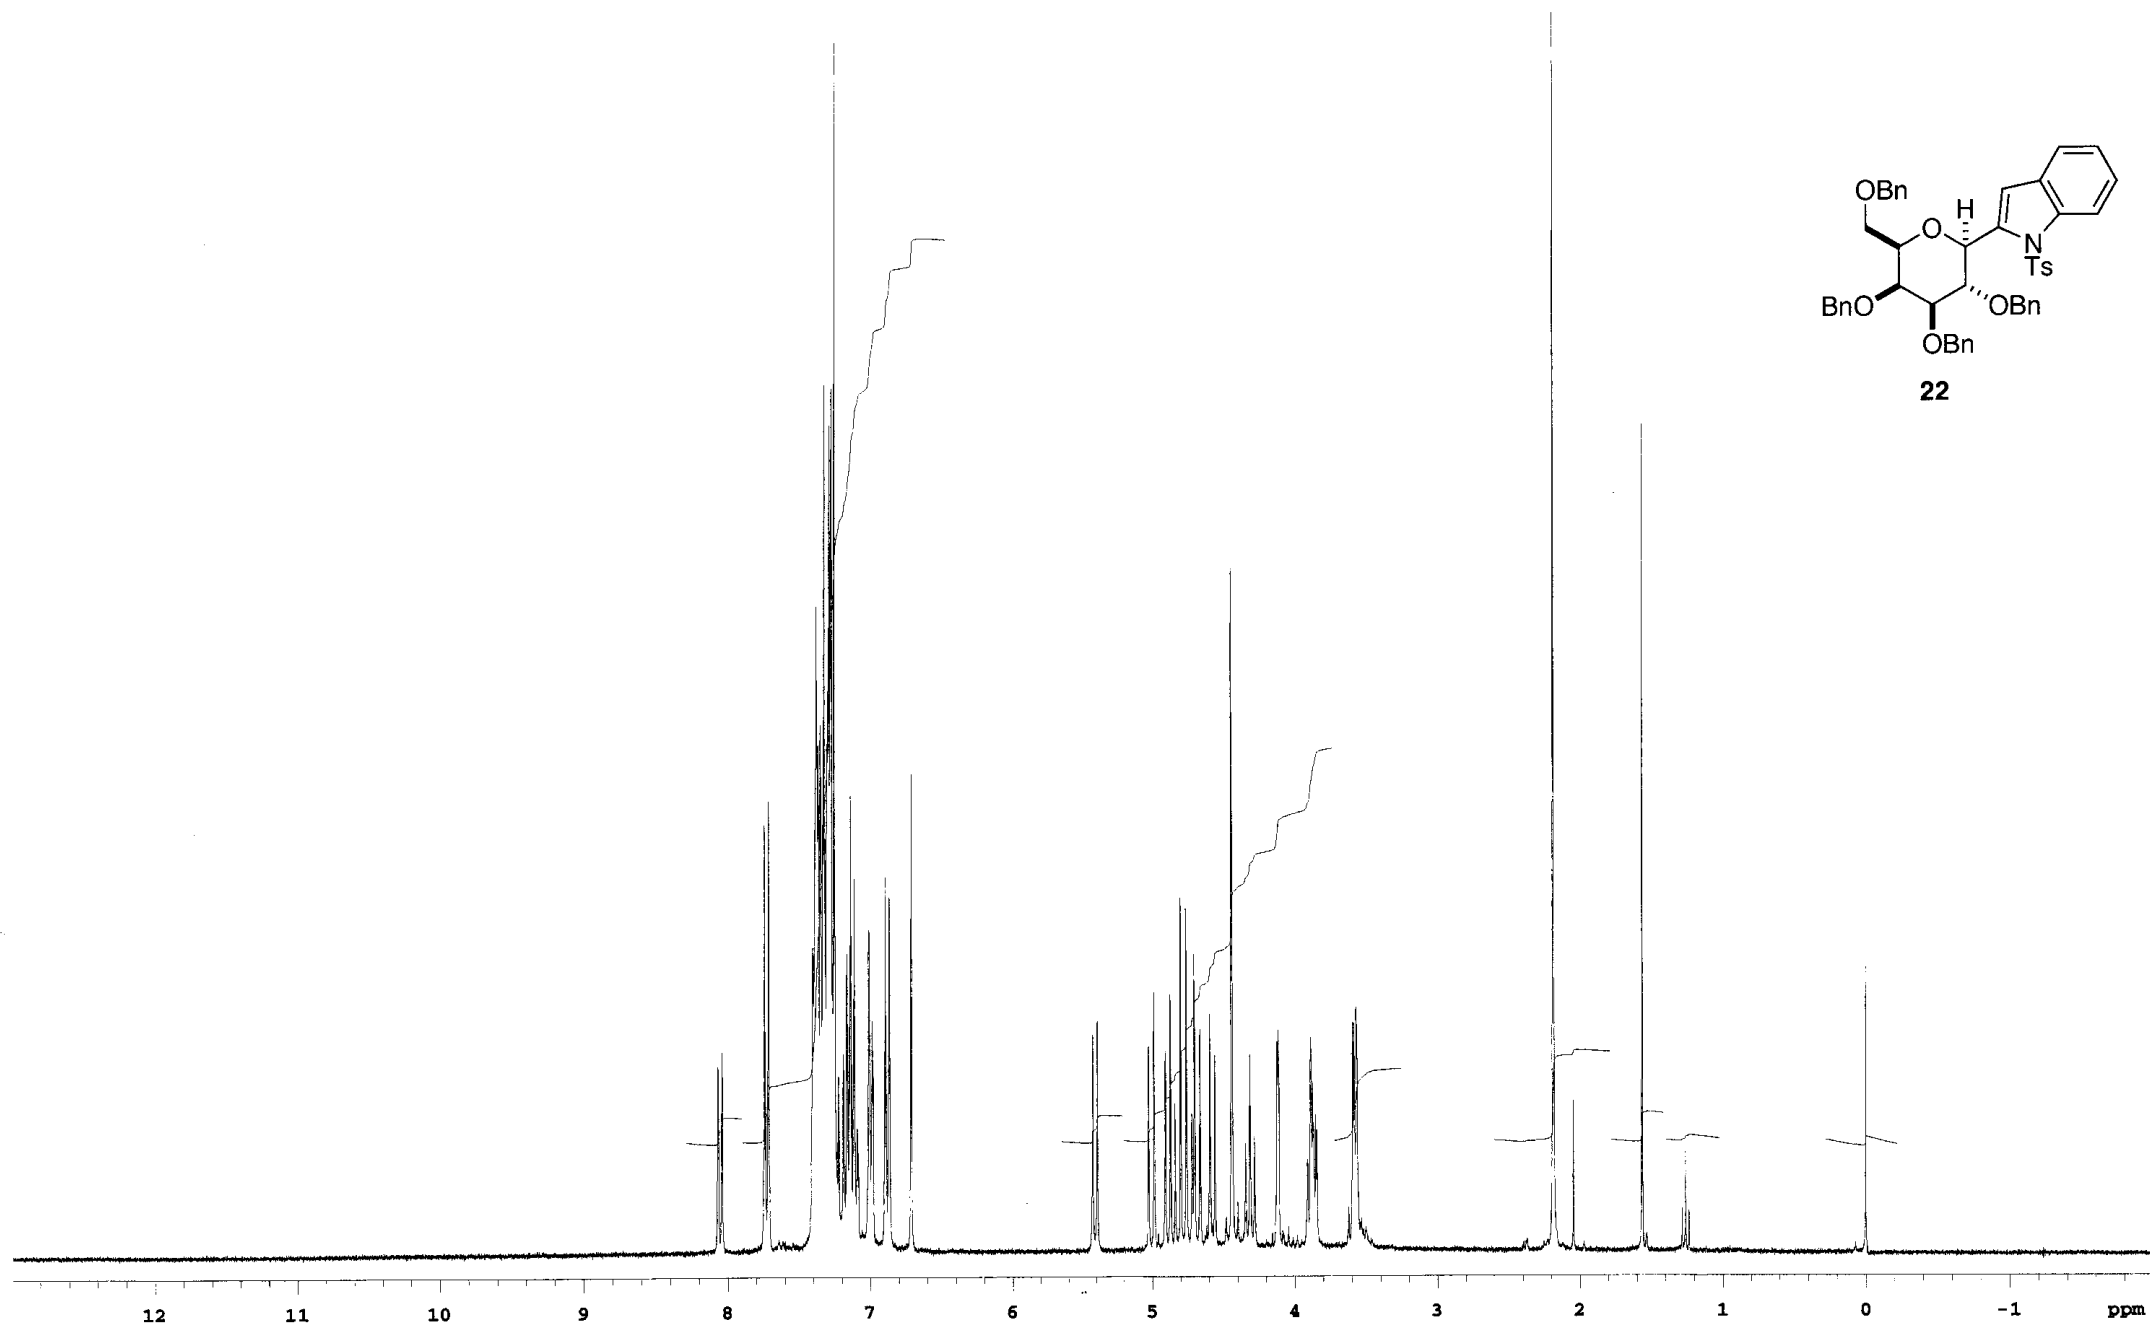

*Handwritten signature*





10/10

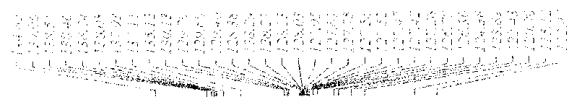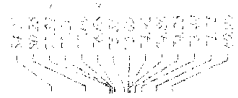

4.23  
X  
2.2  
2.1

X  
2.2  
2.1

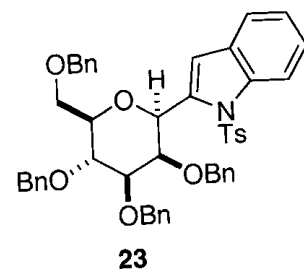

13C NMR (101 MHz, CDCl<sub>3</sub>)  
 145.2, 144.8, 144.4, 144.0, 143.6, 143.2, 142.8, 142.4, 142.0, 141.6, 141.2, 140.8, 140.4, 140.0, 139.6, 139.2, 138.8, 138.4, 138.0, 137.6, 137.2, 136.8, 136.4, 136.0, 135.6, 135.2, 134.8, 134.4, 134.0, 133.6, 133.2, 132.8, 132.4, 132.0, 131.6, 131.2, 130.8, 130.4, 130.0, 129.6, 129.2, 128.8, 128.4, 128.0, 127.6, 127.2, 126.8, 126.4, 126.0, 125.6, 125.2, 124.8, 124.4, 124.0, 123.6, 123.2, 122.8, 122.4, 122.0, 121.6, 121.2, 120.8, 120.4, 120.0, 119.6, 119.2, 118.8, 118.4, 118.0, 117.6, 117.2, 116.8, 116.4, 116.0, 115.6, 115.2, 114.8, 114.4, 114.0, 113.6, 113.2, 112.8, 112.4, 112.0, 111.6, 111.2, 110.8, 110.4, 110.0, 109.6, 109.2, 108.8, 108.4, 108.0, 107.6, 107.2, 106.8, 106.4, 106.0, 105.6, 105.2, 104.8, 104.4, 104.0, 103.6, 103.2, 102.8, 102.4, 102.0, 101.6, 101.2, 100.8, 100.4, 100.0, 99.6, 99.2, 98.8, 98.4, 98.0, 97.6, 97.2, 96.8, 96.4, 96.0, 95.6, 95.2, 94.8, 94.4, 94.0, 93.6, 93.2, 92.8, 92.4, 92.0, 91.6, 91.2, 90.8, 90.4, 90.0, 89.6, 89.2, 88.8, 88.4, 88.0, 87.6, 87.2, 86.8, 86.4, 86.0, 85.6, 85.2, 84.8, 84.4, 84.0, 83.6, 83.2, 82.8, 82.4, 82.0, 81.6, 81.2, 80.8, 80.4, 80.0, 79.6, 79.2, 78.8, 78.4, 78.0, 77.6, 77.2, 76.8, 76.4, 76.0, 75.6, 75.2, 74.8, 74.4, 74.0, 73.6, 73.2, 72.8, 72.4, 72.0, 71.6, 71.2, 70.8, 70.4, 70.0, 69.6, 69.2, 68.8, 68.4, 68.0, 67.6, 67.2, 66.8, 66.4, 66.0, 65.6, 65.2, 64.8, 64.4, 64.0, 63.6, 63.2, 62.8, 62.4, 62.0, 61.6, 61.2, 60.8, 60.4, 60.0, 59.6, 59.2, 58.8, 58.4, 58.0, 57.6, 57.2, 56.8, 56.4, 56.0, 55.6, 55.2, 54.8, 54.4, 54.0, 53.6, 53.2, 52.8, 52.4, 52.0, 51.6, 51.2, 50.8, 50.4, 50.0, 49.6, 49.2, 48.8, 48.4, 48.0, 47.6, 47.2, 46.8, 46.4, 46.0, 45.6, 45.2, 44.8, 44.4, 44.0, 43.6, 43.2, 42.8, 42.4, 42.0, 41.6, 41.2, 40.8, 40.4, 40.0, 39.6, 39.2, 38.8, 38.4, 38.0, 37.6, 37.2, 36.8, 36.4, 36.0, 35.6, 35.2, 34.8, 34.4, 34.0, 33.6, 33.2, 32.8, 32.4, 32.0, 31.6, 31.2, 30.8, 30.4, 30.0, 29.6, 29.2, 28.8, 28.4, 28.0, 27.6, 27.2, 26.8, 26.4, 26.0, 25.6, 25.2, 24.8, 24.4, 24.0, 23.6, 23.2, 22.8, 22.4, 22.0, 21.6, 21.2, 20.8, 20.4, 20.0, 19.6, 19.2, 18.8, 18.4, 18.0, 17.6, 17.2, 16.8, 16.4, 16.0, 15.6, 15.2, 14.8, 14.4, 14.0, 13.6, 13.2, 12.8, 12.4, 12.0, 11.6, 11.2, 10.8, 10.4, 10.0, 9.6, 9.2, 8.8, 8.4, 8.0, 7.6, 7.2, 6.8, 6.4, 6.0, 5.6, 5.2, 4.8, 4.4, 4.0, 3.6, 3.2, 2.8, 2.4, 2.0, 1.6, 1.2, 0.8, 0.4, 0.0

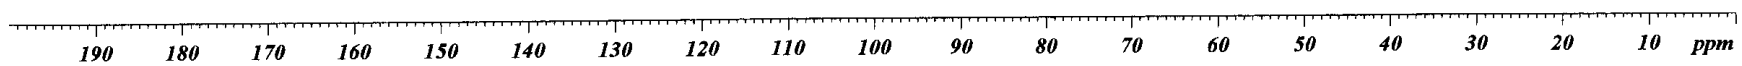



Current Data Parameters  
 NAME koido400-1  
 EXPNO 21  
 PROCNO 1

F2 - Acquisition Parameters  
 Date\_ 701021  
 Time 2.47  
 INSTRUM ARX400  
 PROBHD 5 mm QNP  
 PULPROG zgpg30  
 TD 32768  
 SOLVENT CDCL3  
 NS 8  
 DS 2  
 SWH 6410.256 Hz  
 FIDRES 0.195625 Hz  
 AQ 2.5559540 sec  
 RG 1430  
 DW 78.000 usec  
 DE 97.50 usec  
 TE 300.0 K

F2 - Processing parameters  
 SI 16384  
 SF 400.1343969 MHz

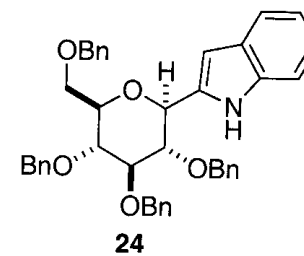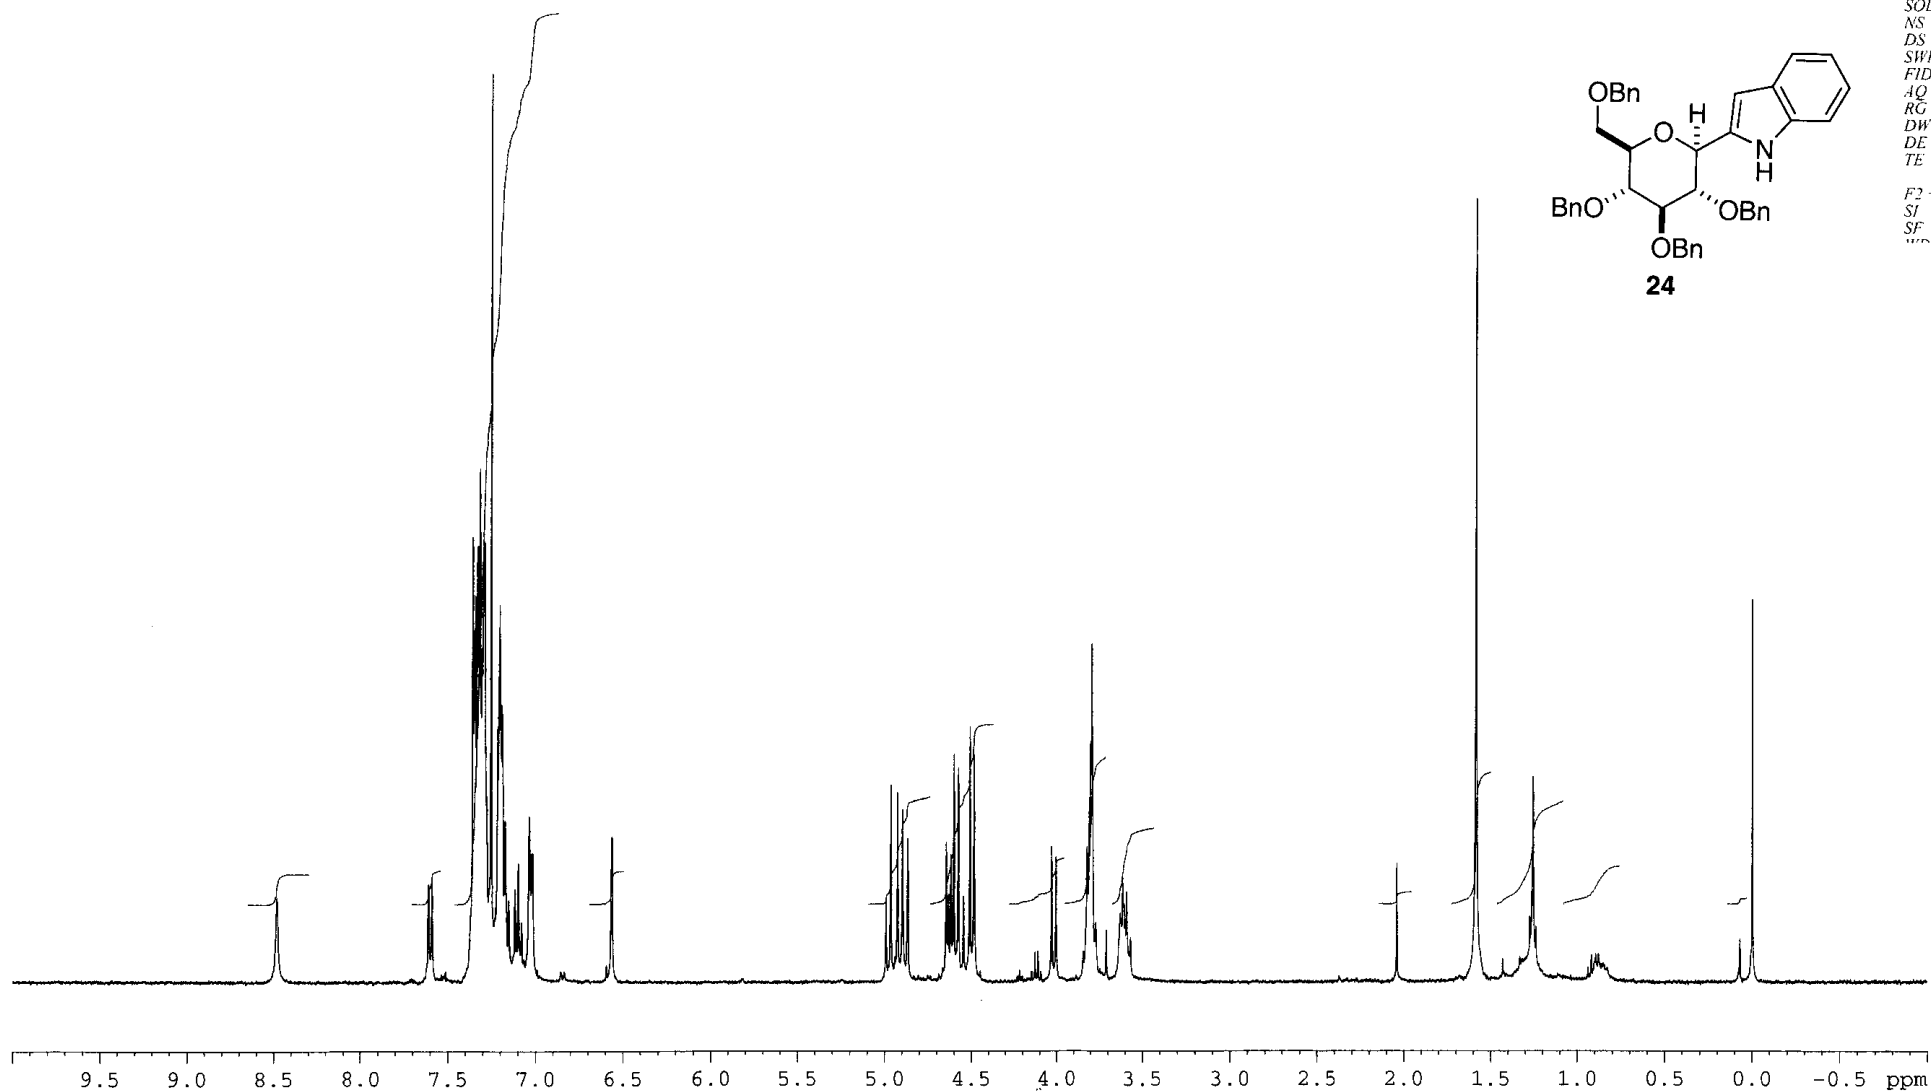

Solvent: CDCl<sub>3</sub>  
 Ambient temperature  
 GEMINI-300 "varian"

## PULSE SEQUENCE

Pulse 35.0 degrees  
 Acq. time 1.697 sec  
 Width 18858.5 Hz  
 384 repetitions

OBSERVE C13, 75.4264086 MHz

DECOUPLE H1, 299.9672195 MHz

Power 30 dB

continuously on

WALTZ-16 modulated

DATA PROCESSING

Line broadening 2.0 Hz

FT size 65536

Total time 10 minutes

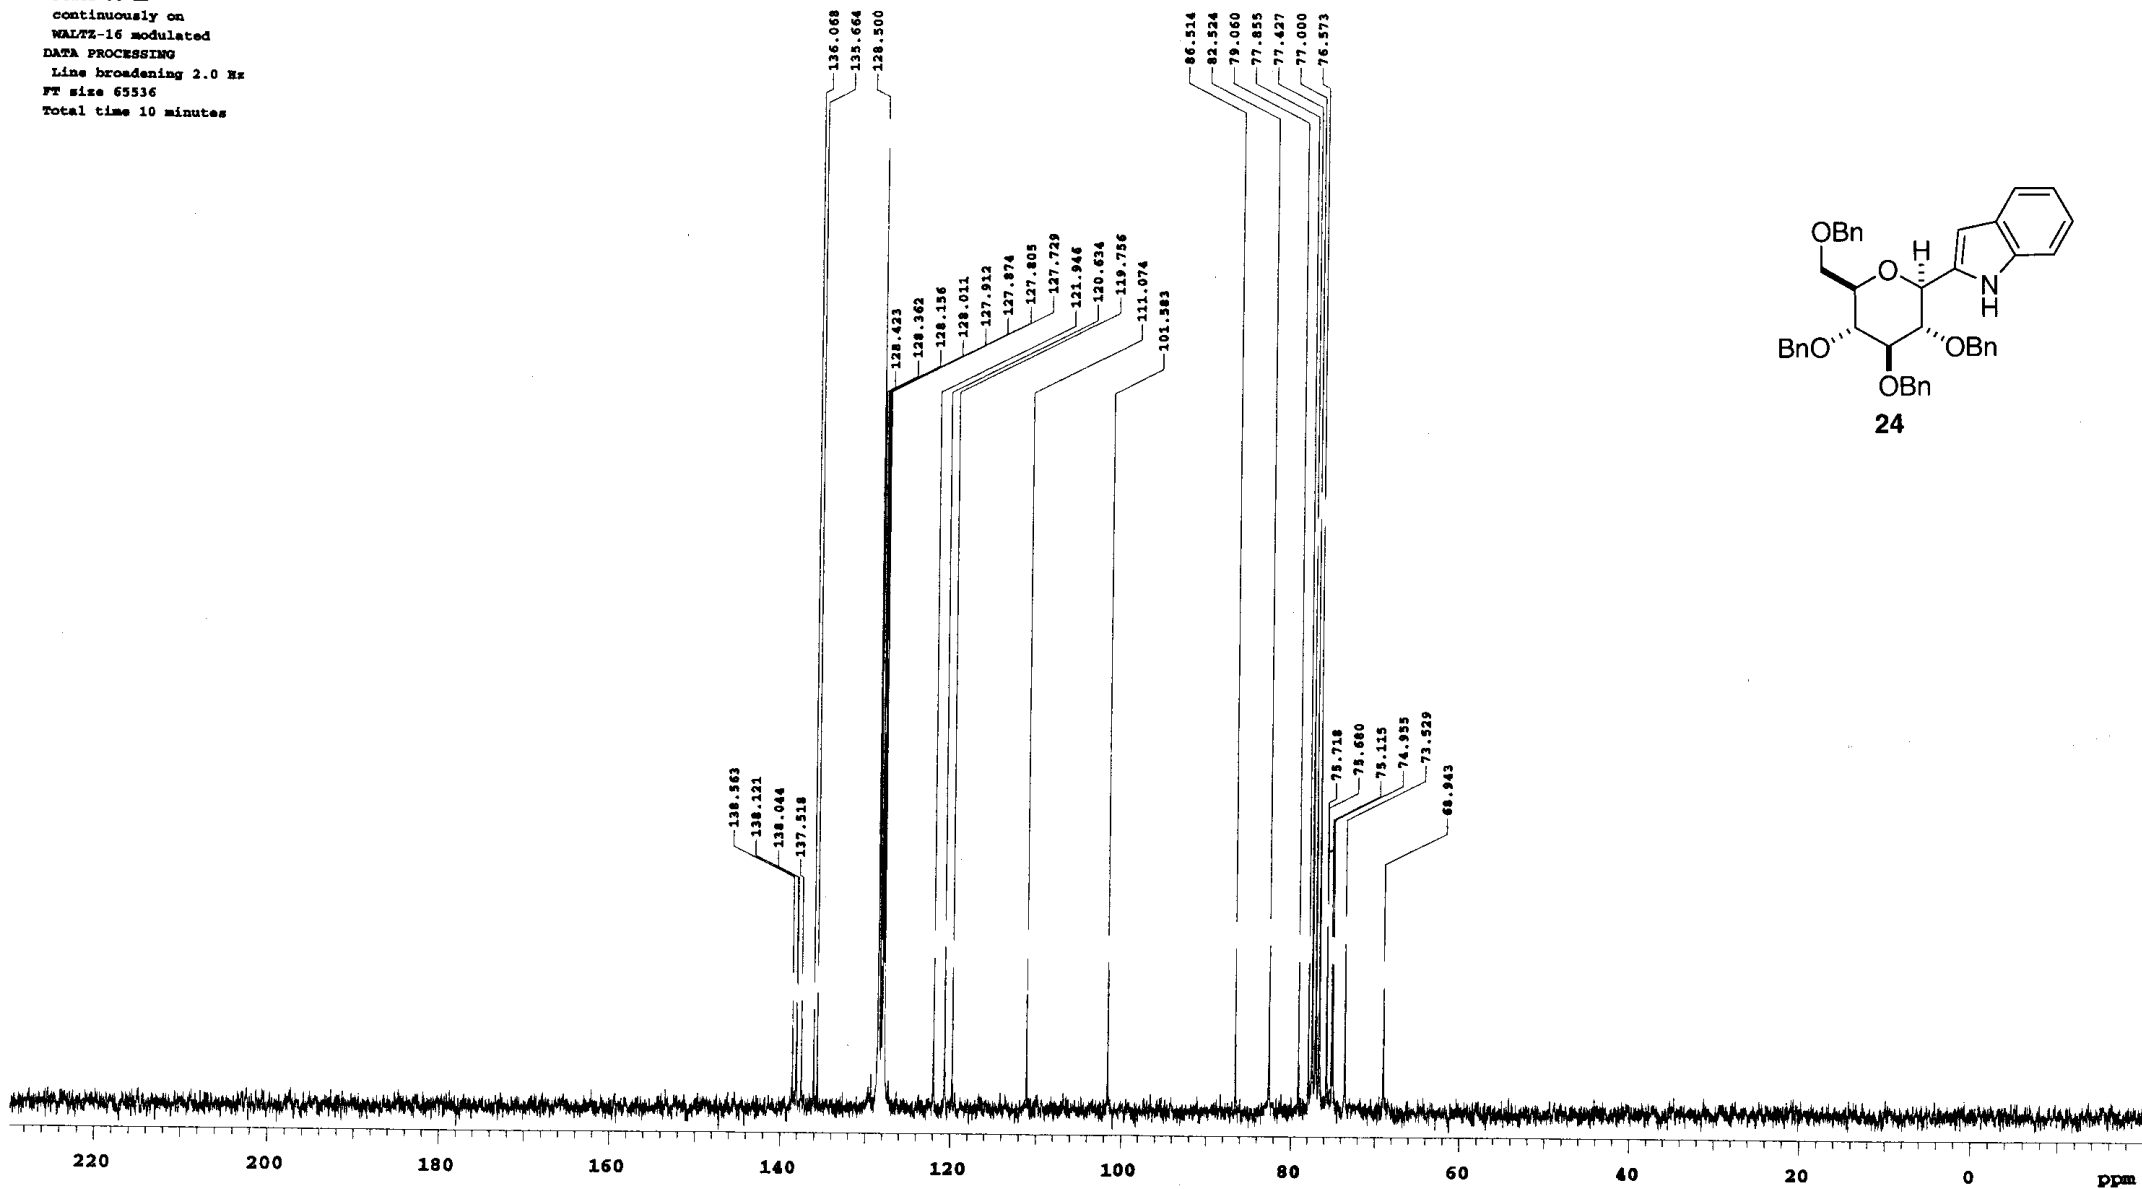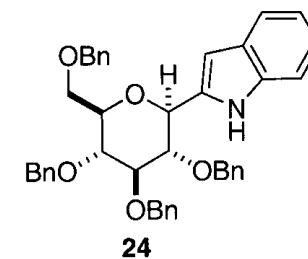

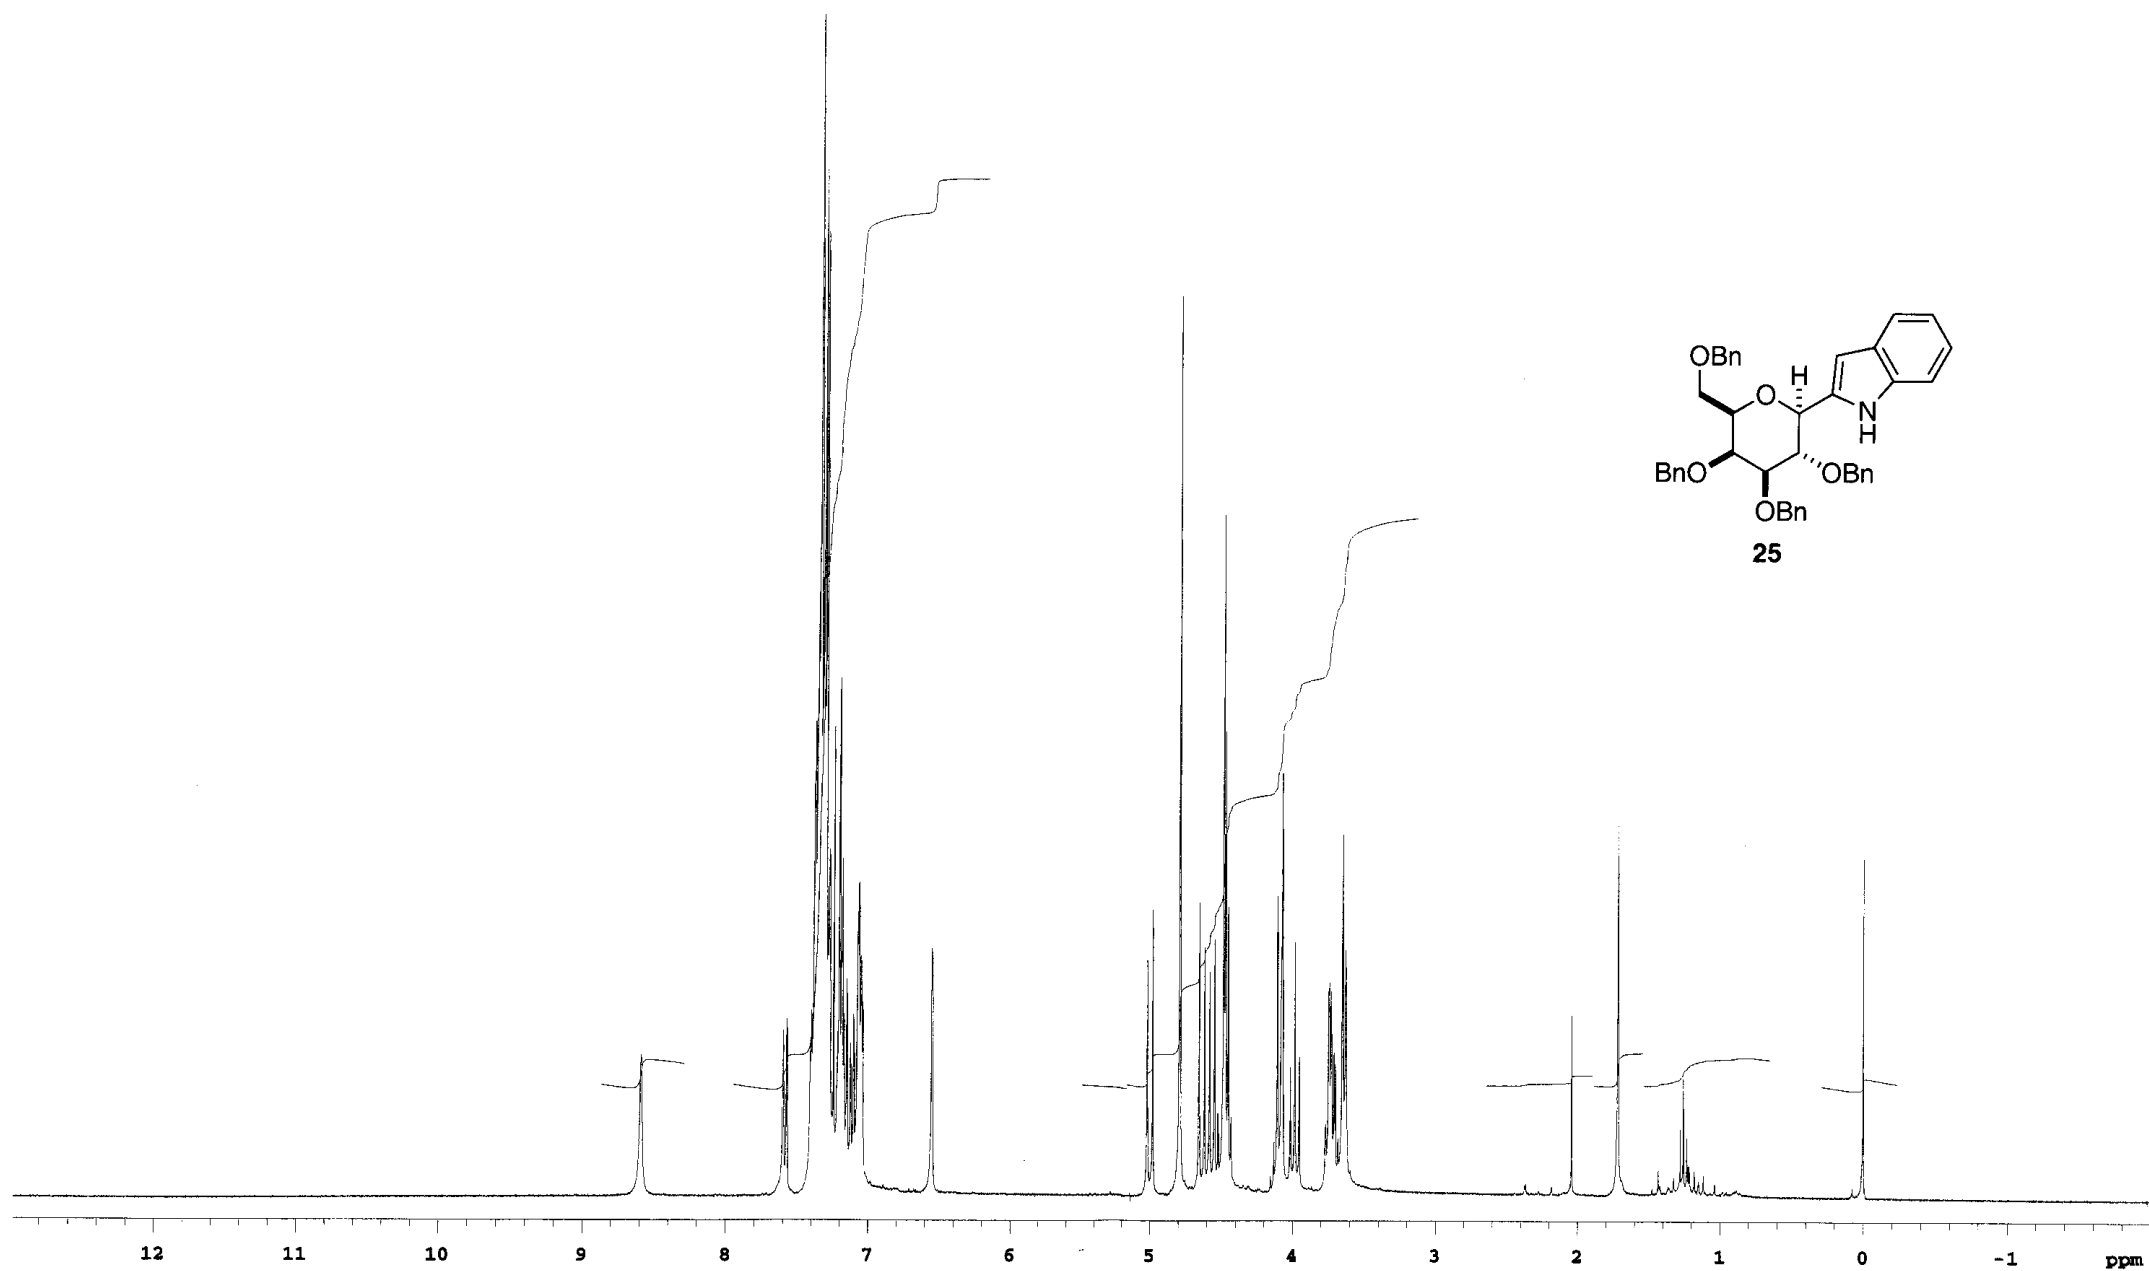

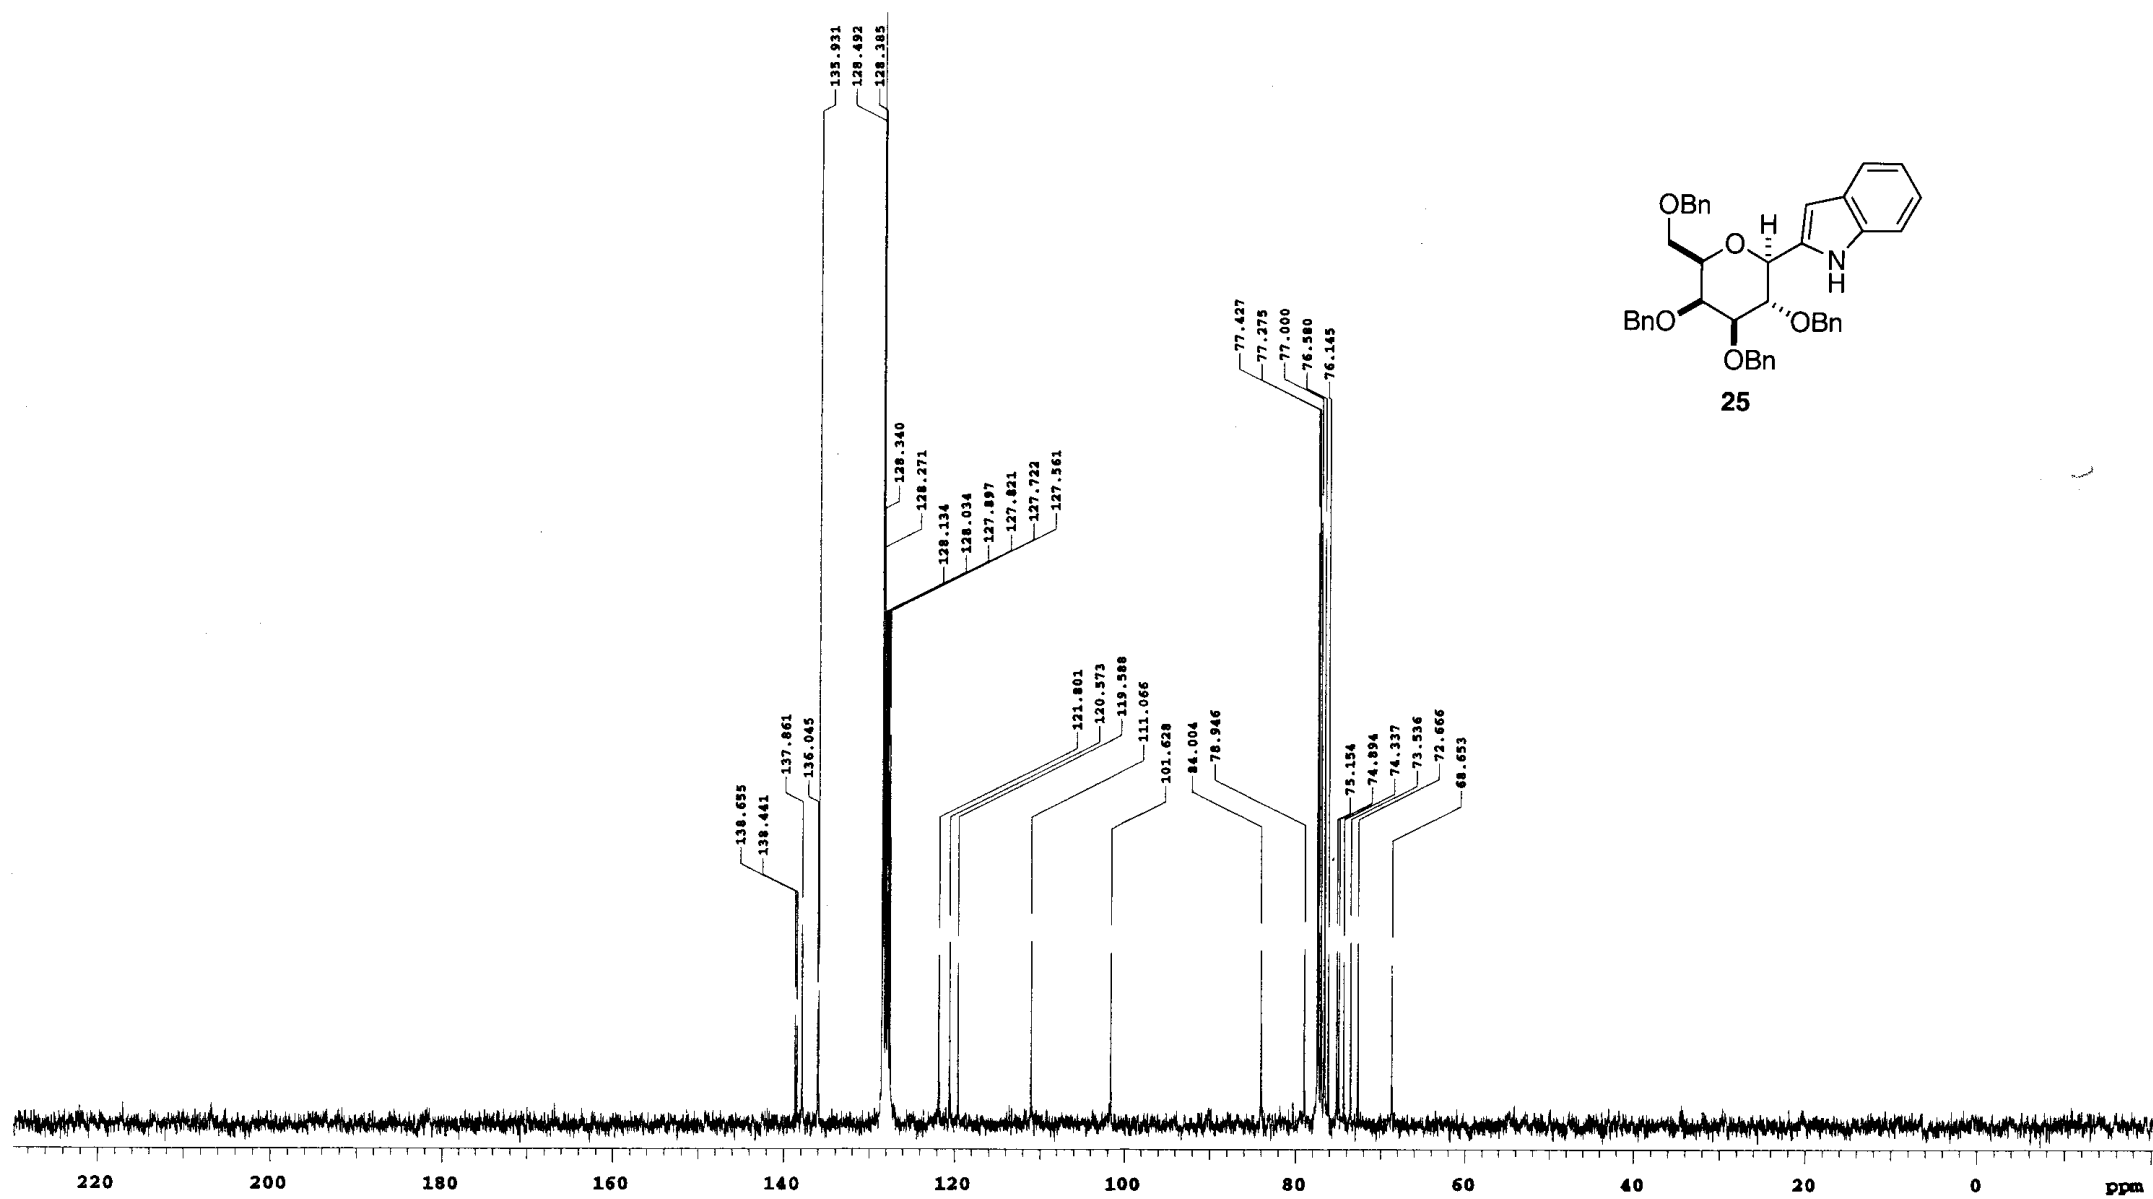

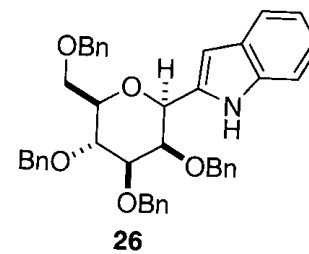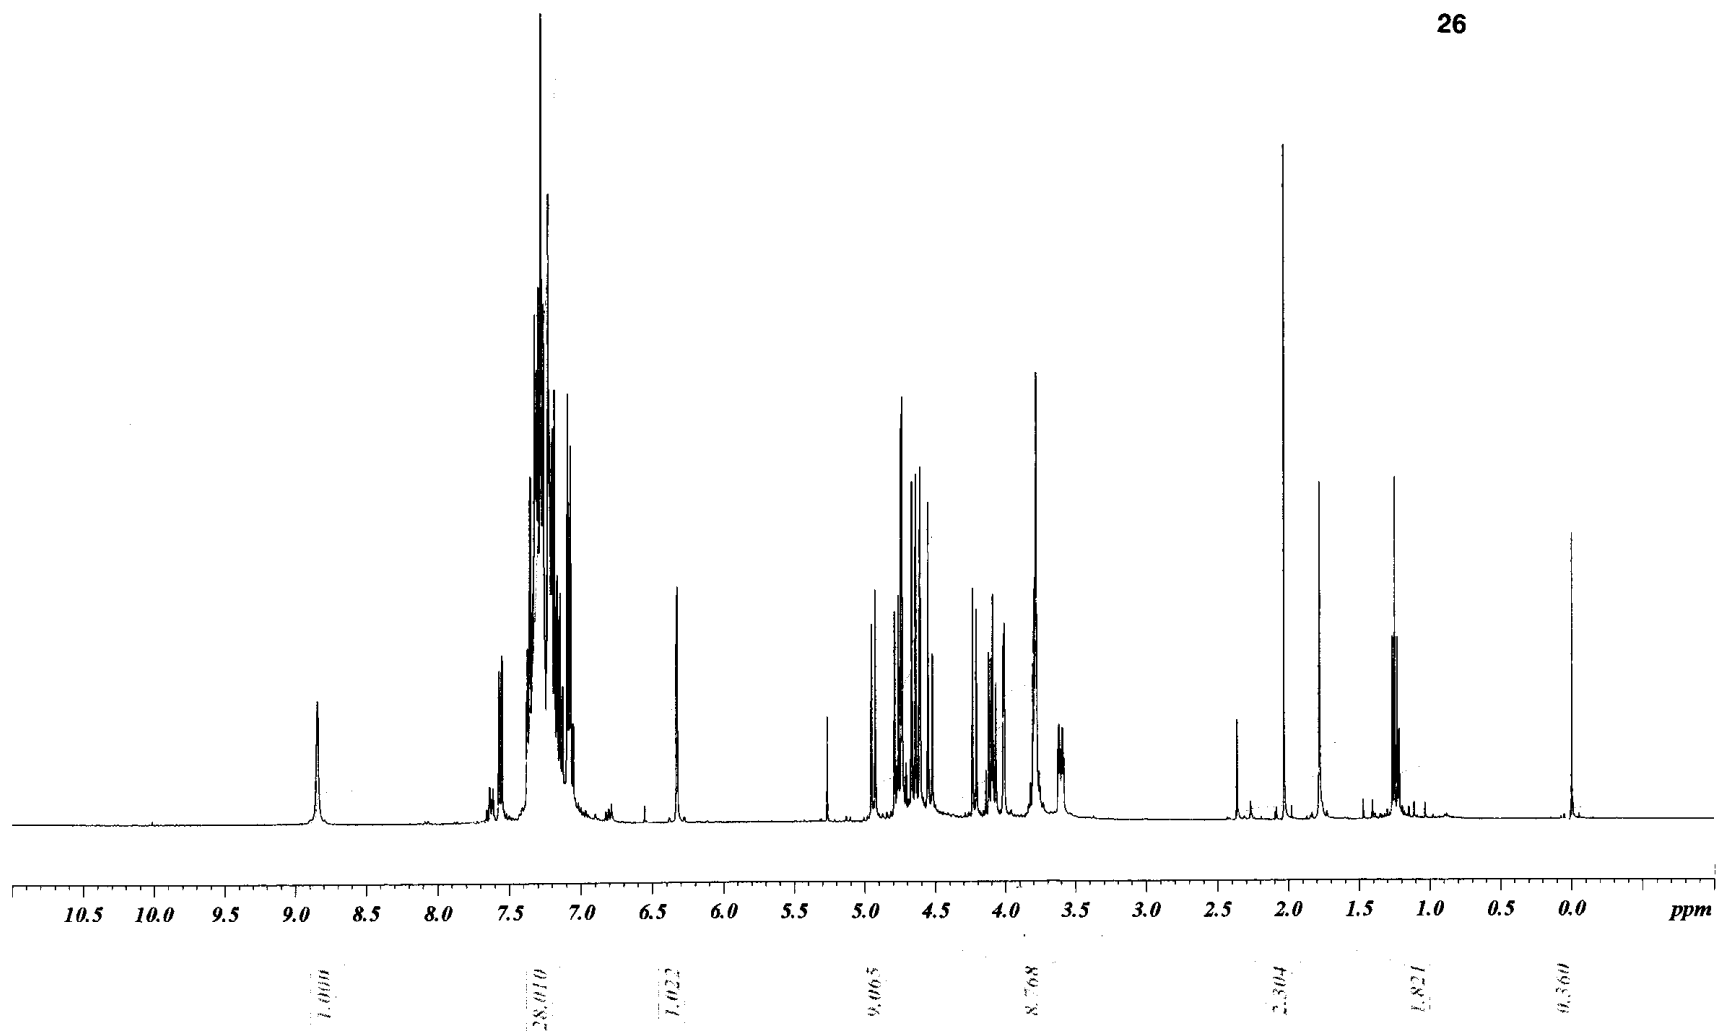









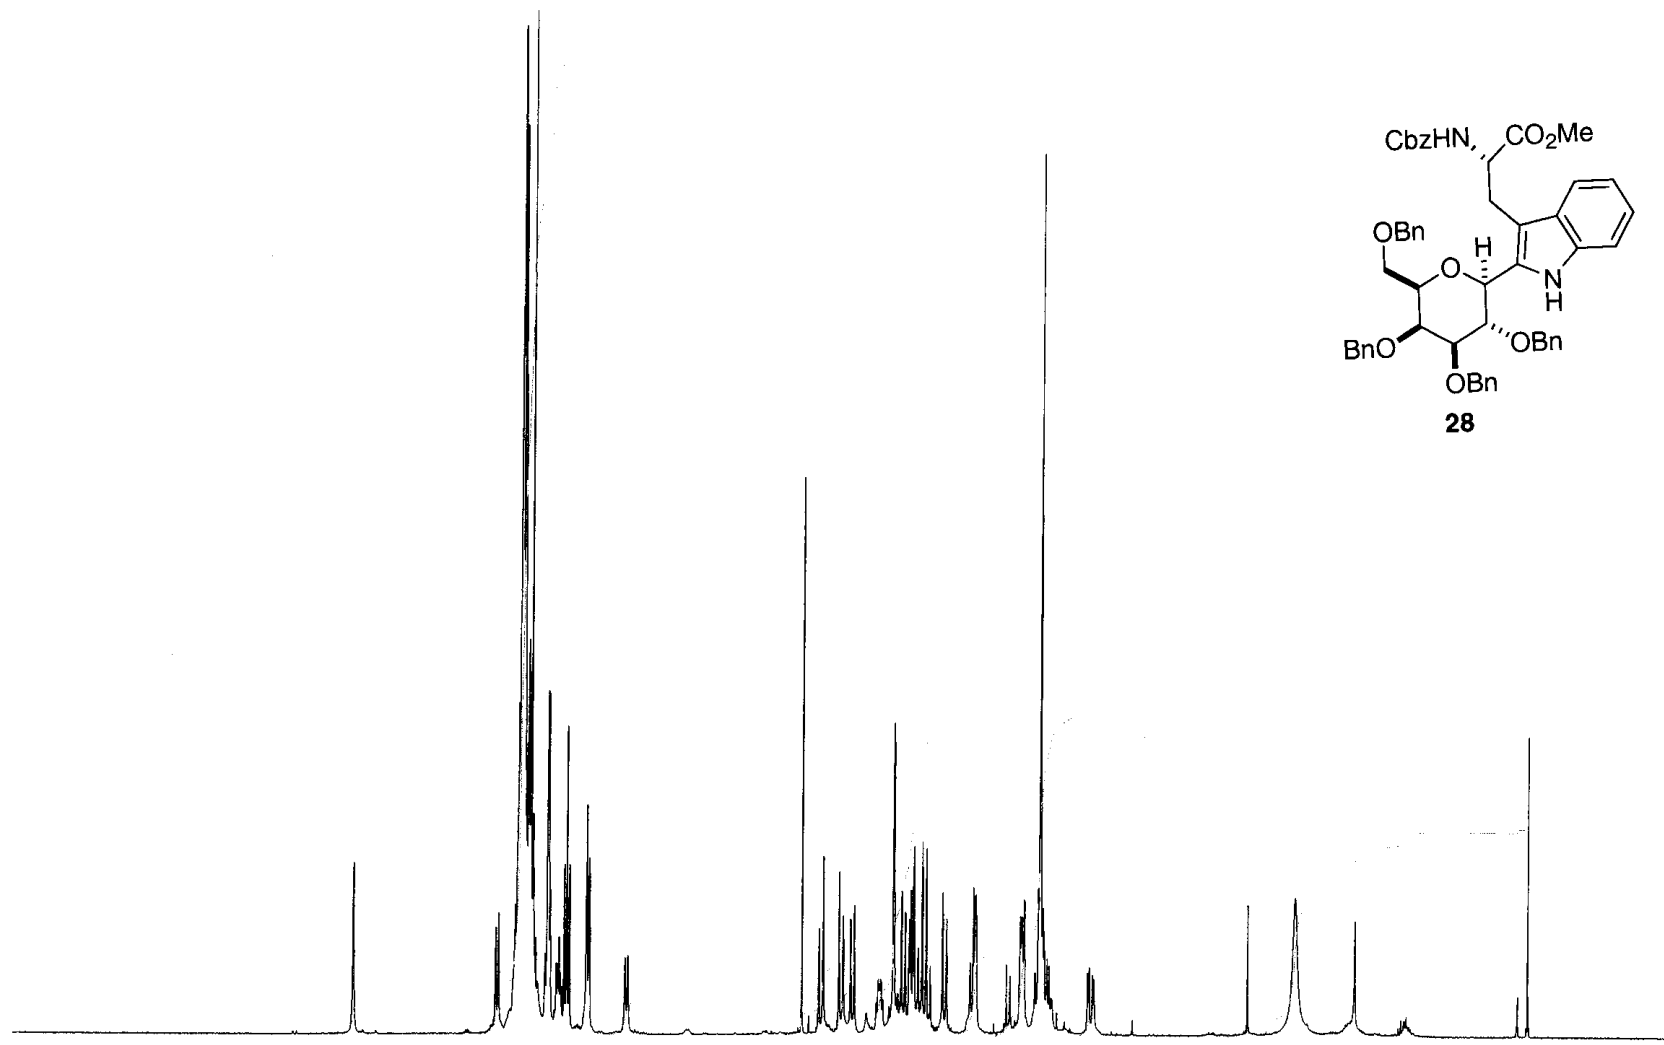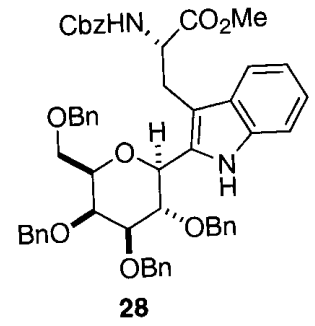

Name: *1,2,3,4-tetra-O-benzyl-5-(benzylamino)-6-(methyl ester)-D-glucopyranose*  
 MW: 514.54  
 C<sub>28</sub>H<sub>36</sub>N<sub>2</sub>O<sub>7</sub>  
 Formula: COC(=O)C[C@@H](c1ccccc1)C[C@H]2O[C@@H](COC(=O)c3ccccc3)[C@H](OC(=O)c4ccccc4)[C@@H](OC(=O)c5ccccc5)[C@H]2OC(=O)c6ccccc6  
 SMILES: COC(=O)C[C@@H](c1ccccc1)C[C@H]2O[C@@H](COC(=O)c3ccccc3)[C@H](OC(=O)c4ccccc4)[C@@H](OC(=O)c5ccccc5)[C@H]2OC(=O)c6ccccc6  
 InChI: COC(=O)C[C@@H](c1ccccc1)C[C@H]2O[C@@H](COC(=O)c3ccccc3)[C@H](OC(=O)c4ccccc4)[C@@H](OC(=O)c5ccccc5)[C@H]2OC(=O)c6ccccc6  
 InChIKey: COC(=O)C[C@@H](c1ccccc1)C[C@H]2O[C@@H](COC(=O)c3ccccc3)[C@H](OC(=O)c4ccccc4)[C@@H](OC(=O)c5ccccc5)[C@H]2OC(=O)c6ccccc6

*Handwritten signature*

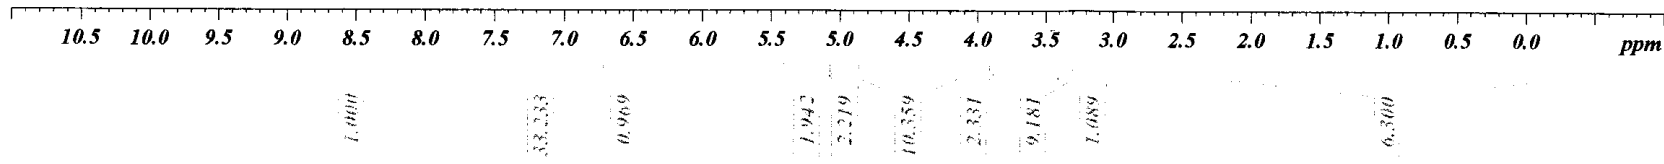



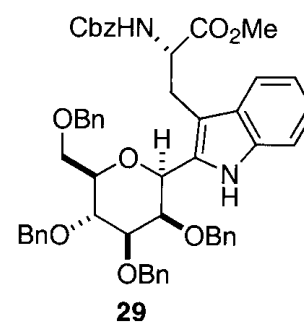

*1H*-NMR (400 MHz, CDCl<sub>3</sub>) δ: 7.40 (d, 1H), 7.35 (d, 1H), 7.25 (d, 1H), 7.15 (d, 1H), 7.05 (d, 1H), 6.95 (d, 1H), 6.85 (d, 1H), 6.75 (d, 1H), 6.65 (d, 1H), 6.55 (d, 1H), 6.45 (d, 1H), 6.35 (d, 1H), 6.25 (d, 1H), 6.15 (d, 1H), 6.05 (d, 1H), 5.95 (d, 1H), 5.85 (d, 1H), 5.75 (d, 1H), 5.65 (d, 1H), 5.55 (d, 1H), 5.45 (d, 1H), 5.35 (d, 1H), 5.25 (d, 1H), 5.15 (d, 1H), 5.05 (d, 1H), 4.95 (d, 1H), 4.85 (d, 1H), 4.75 (d, 1H), 4.65 (d, 1H), 4.55 (d, 1H), 4.45 (d, 1H), 4.35 (d, 1H), 4.25 (d, 1H), 4.15 (d, 1H), 4.05 (d, 1H), 3.95 (d, 1H), 3.85 (d, 1H), 3.75 (d, 1H), 3.65 (d, 1H), 3.55 (d, 1H), 3.45 (d, 1H), 3.35 (d, 1H), 3.25 (d, 1H), 3.15 (d, 1H), 3.05 (d, 1H), 2.95 (d, 1H), 2.85 (d, 1H), 2.75 (d, 1H), 2.65 (d, 1H), 2.55 (d, 1H), 2.45 (d, 1H), 2.35 (d, 1H), 2.25 (d, 1H), 2.15 (d, 1H), 2.05 (d, 1H), 1.95 (d, 1H), 1.85 (d, 1H), 1.75 (d, 1H), 1.65 (d, 1H), 1.55 (d, 1H), 1.45 (d, 1H), 1.35 (d, 1H), 1.25 (d, 1H), 1.15 (d, 1H), 1.05 (d, 1H), 1.95 (d, 1H), 1.85 (d, 1H), 1.75 (d, 1H), 1.65 (d, 1H), 1.55 (d, 1H), 1.45 (d, 1H), 1.35 (d, 1H), 1.25 (d, 1H), 1.15 (d, 1H), 1.05 (d, 1H), 0.95 (d, 1H), 0.85 (d, 1H), 0.75 (d, 1H), 0.65 (d, 1H), 0.55 (d, 1H), 0.45 (d, 1H), 0.35 (d, 1H), 0.25 (d, 1H), 0.15 (d, 1H).

*13C*-NMR (100 MHz, CDCl<sub>3</sub>) δ: 175.0, 170.0, 165.0, 160.0, 155.0, 150.0, 145.0, 140.0, 135.0, 130.0, 125.0, 120.0, 115.0, 110.0, 105.0, 100.0, 95.0, 90.0, 85.0, 80.0, 75.0, 70.0, 65.0, 60.0, 55.0, 50.0, 45.0, 40.0, 35.0, 30.0, 25.0, 20.0, 15.0, 10.0, 5.0, 0.0.

*13C*-NMR (100 MHz, CDCl<sub>3</sub>) δ: 175.0, 170.0, 165.0, 160.0, 155.0, 150.0, 145.0, 140.0, 135.0, 130.0, 125.0, 120.0, 115.0, 110.0, 105.0, 100.0, 95.0, 90.0, 85.0, 80.0, 75.0, 70.0, 65.0, 60.0, 55.0, 50.0, 45.0, 40.0, 35.0, 30.0, 25.0, 20.0, 15.0, 10.0, 5.0, 0.0.

*13C*-NMR (100 MHz, CDCl<sub>3</sub>) δ: 175.0, 170.0, 165.0, 160.0, 155.0, 150.0, 145.0, 140.0, 135.0, 130.0, 125.0, 120.0, 115.0, 110.0, 105.0, 100.0, 95.0, 90.0, 85.0, 80.0, 75.0, 70.0, 65.0, 60.0, 55.0, 50.0, 45.0, 40.0, 35.0, 30.0, 25.0, 20.0, 15.0, 10.0, 5.0, 0.0.

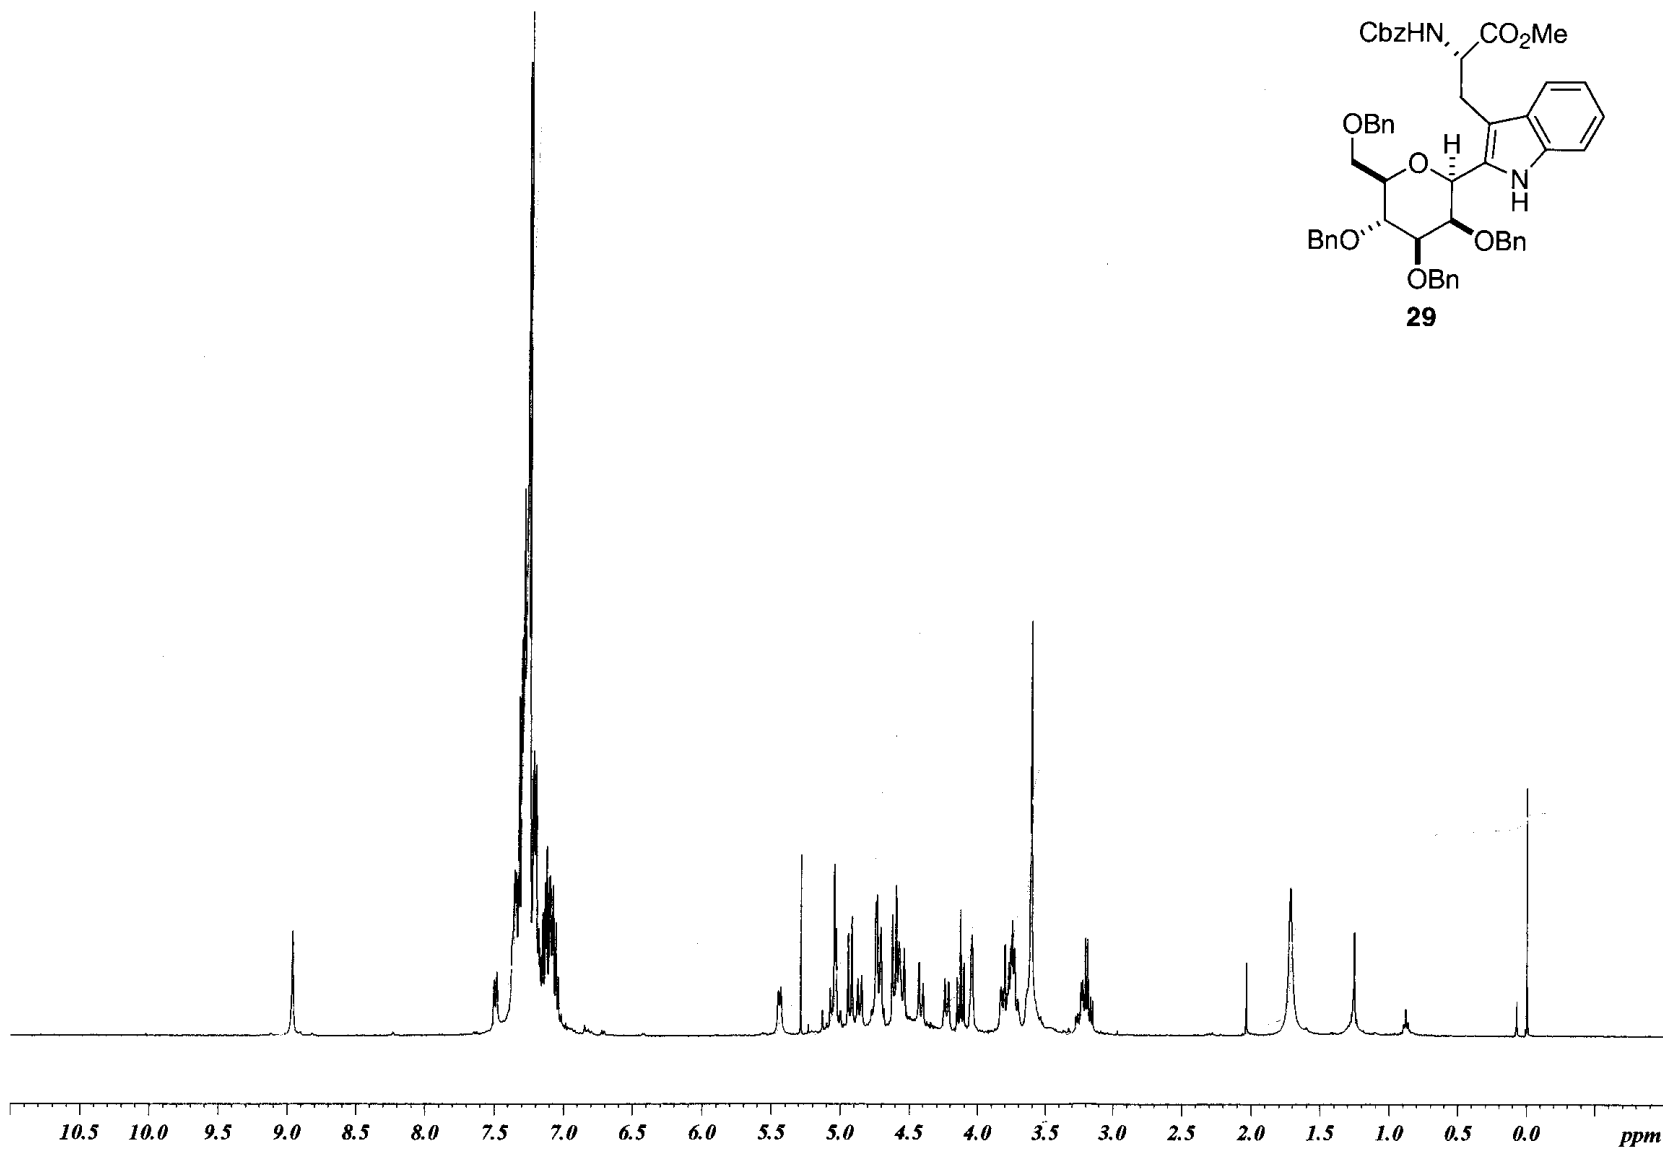

1.000

3.2586

0.868

1.2339

3.436

8.125

2.271

6.328

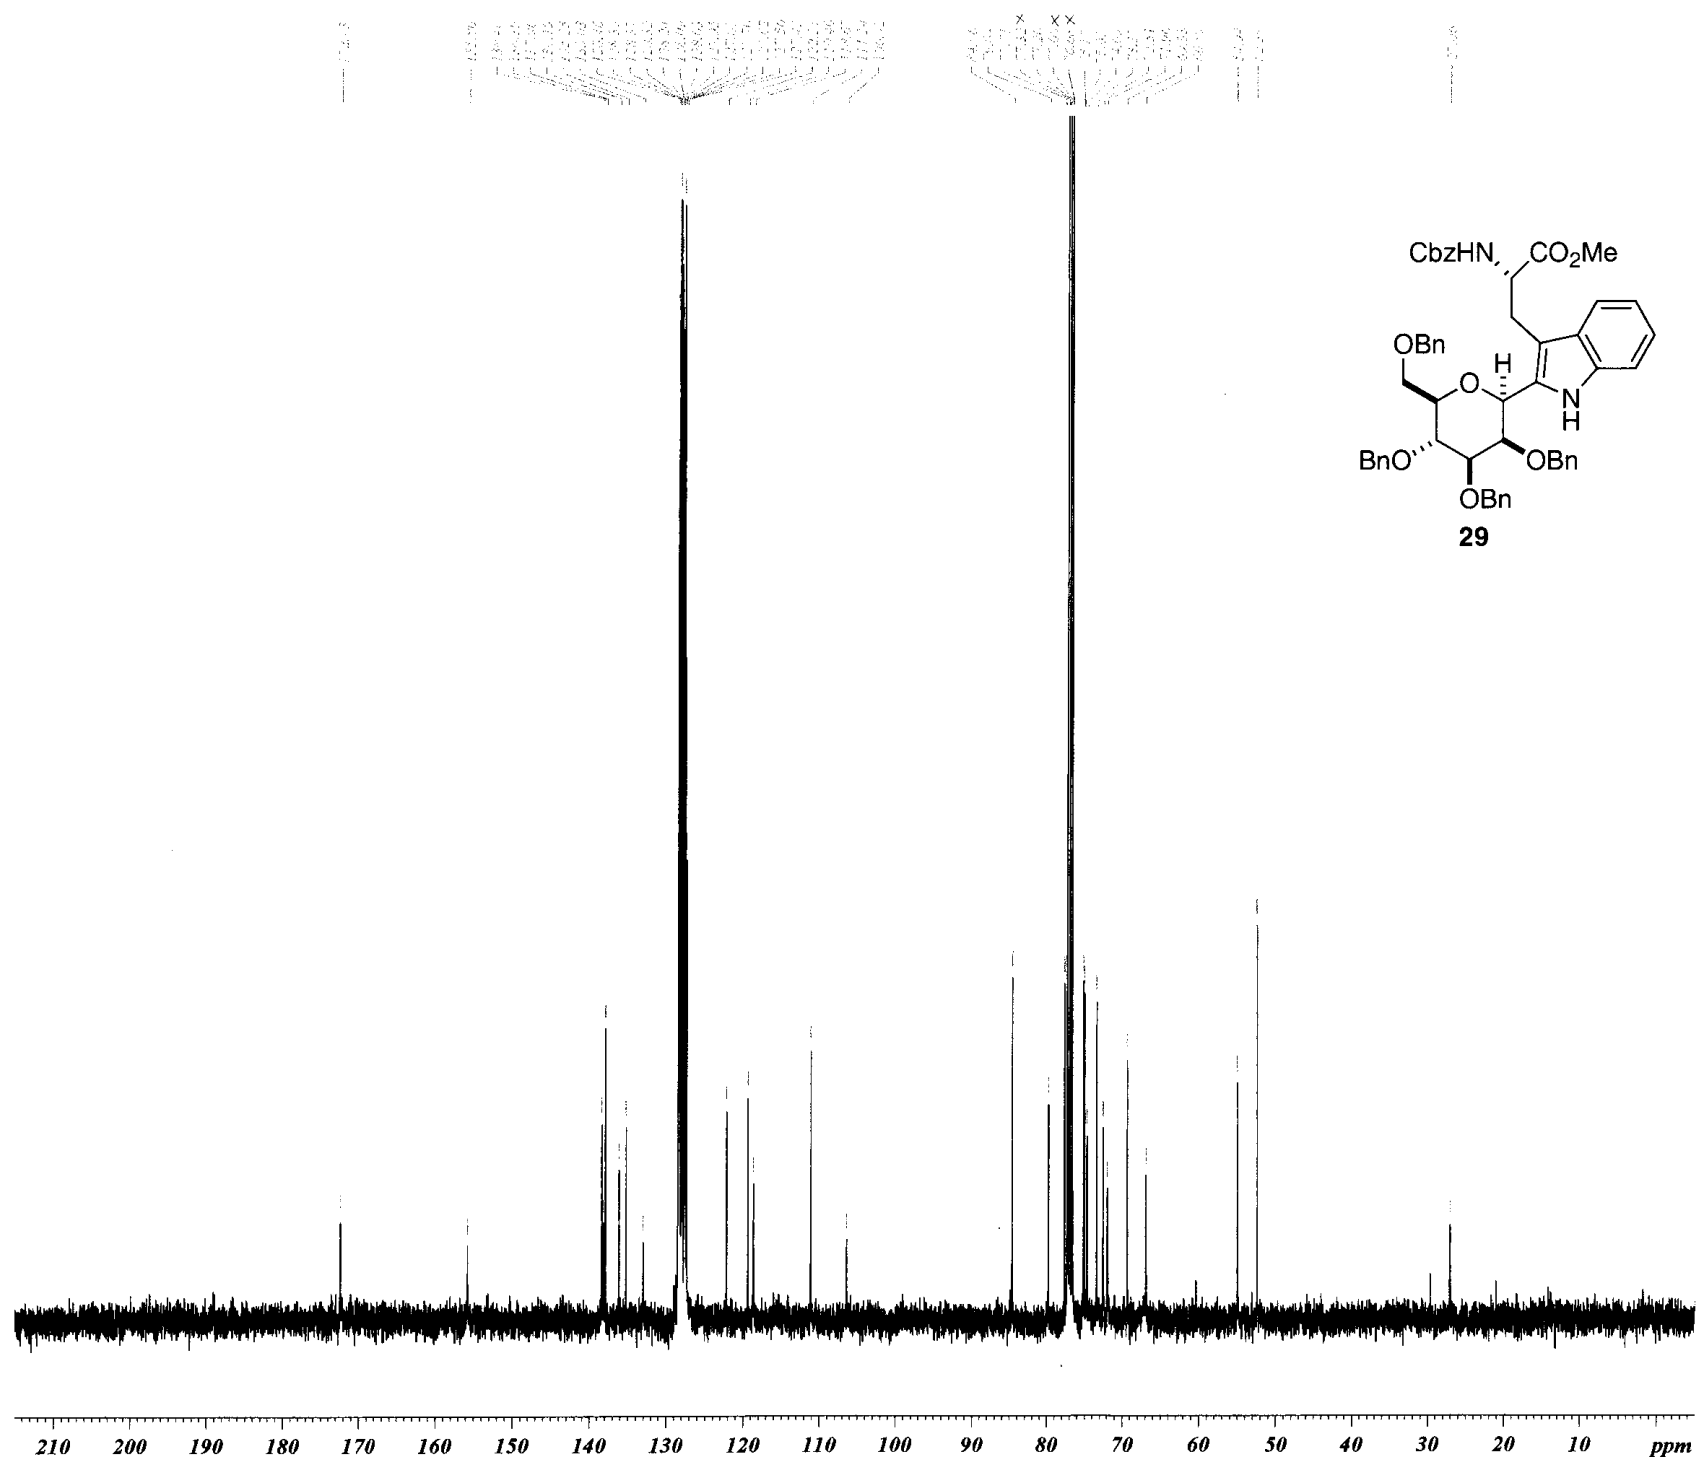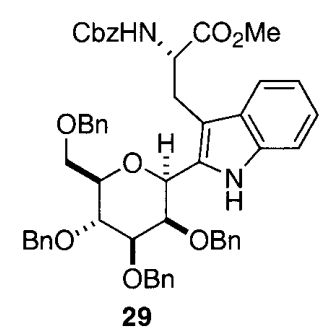

*13*C NMR (CDCl<sub>3</sub>) δ: 171.1 (C=O), 143.1, 142.8, 142.5, 142.2, 141.9, 141.6, 141.3, 141.0, 140.7, 140.4, 140.1, 139.8, 139.5, 139.2, 138.9, 138.6, 138.3, 138.0, 137.7, 137.4, 137.1, 136.8, 136.5, 136.2, 135.9, 135.6, 135.3, 135.0, 134.7, 134.4, 134.1, 133.8, 133.5, 133.2, 132.9, 132.6, 132.3, 132.0, 131.7, 131.4, 131.1, 130.8, 130.5, 130.2, 129.9, 129.6, 129.3, 129.0, 128.7, 128.4, 128.1, 127.8, 127.5, 127.2, 126.9, 126.6, 126.3, 126.0, 125.7, 125.4, 125.1, 124.8, 124.5, 124.2, 123.9, 123.6, 123.3, 123.0, 122.7, 122.4, 122.1, 121.8, 121.5, 121.2, 120.9, 120.6, 120.3, 120.0, 119.7, 119.4, 119.1, 118.8, 118.5, 118.2, 117.9, 117.6, 117.3, 117.0, 116.7, 116.4, 116.1, 115.8, 115.5, 115.2, 114.9, 114.6, 114.3, 114.0, 113.7, 113.4, 113.1, 112.8, 112.5, 112.2, 111.9, 111.6, 111.3, 111.0, 110.7, 110.4, 110.1, 109.8, 109.5, 109.2, 108.9, 108.6, 108.3, 108.0, 107.7, 107.4, 107.1, 106.8, 106.5, 106.2, 105.9, 105.6, 105.3, 105.0, 104.7, 104.4, 104.1, 103.8, 103.5, 103.2, 102.9, 102.6, 102.3, 102.0, 101.7, 101.4, 101.1, 100.8, 100.5, 100.2, 99.9, 99.6, 99.3, 99.0, 98.7, 98.4, 98.1, 97.8, 97.5, 97.2, 96.9, 96.6, 96.3, 96.0, 95.7, 95.4, 95.1, 94.8, 94.5, 94.2, 93.9, 93.6, 93.3, 93.0, 92.7, 92.4, 92.1, 91.8, 91.5, 91.2, 90.9, 90.6, 90.3, 90.0, 89.7, 89.4, 89.1, 88.8, 88.5, 88.2, 87.9, 87.6, 87.3, 87.0, 86.7, 86.4, 86.1, 85.8, 85.5, 85.2, 84.9, 84.6, 84.3, 84.0, 83.7, 83.4, 83.1, 82.8, 82.5, 82.2, 81.9, 81.6, 81.3, 81.0, 80.7, 80.4, 80.1, 79.8, 79.5, 79.2, 78.9, 78.6, 78.3, 78.0, 77.7, 77.4, 77.1, 76.8, 76.5, 76.2, 75.9, 75.6, 75.3, 75.0, 74.7, 74.4, 74.1, 73.8, 73.5, 73.2, 72.9, 72.6, 72.3, 72.0, 71.7, 71.4, 71.1, 70.8, 70.5, 70.2, 69.9, 69.6, 69.3, 69.0, 68.7, 68.4, 68.1, 67.8, 67.5, 67.2, 66.9, 66.6, 66.3, 66.0, 65.7, 65.4, 65.1, 64.8, 64.5, 64.2, 63.9, 63.6, 63.3, 63.0, 62.7, 62.4, 62.1, 61.8, 61.5, 61.2, 60.9, 60.6, 60.3, 60.0, 59.7, 59.4, 59.1, 58.8, 58.5, 58.2, 57.9, 57.6, 57.3, 57.0, 56.7, 56.4, 56.1, 55.8, 55.5, 55.2, 54.9, 54.6, 54.3, 54.0, 53.7, 53.4, 53.1, 52.8, 52.5, 52.2, 51.9, 51.6, 51.3, 51.0, 50.7, 50.4, 50.1, 49.8, 49.5, 49.2, 48.9, 48.6, 48.3, 48.0, 47.7, 47.4, 47.1, 46.8, 46.5, 46.2, 45.9, 45.6, 45.3, 45.0, 44.7, 44.4, 44.1, 43.8, 43.5, 43.2, 42.9, 42.6, 42.3, 42.0, 41.7, 41.4, 41.1, 40.8, 40.5, 40.2, 39.9, 39.6, 39.3, 39.0, 38.7, 38.4, 38.1, 37.8, 37.5, 37.2, 36.9, 36.6, 36.3, 36.0, 35.7, 35.4, 35.1, 34.8, 34.5, 34.2, 33.9, 33.6, 33.3, 33.0, 32.7, 32.4, 32.1, 31.8, 31.5, 31.2, 30.9, 30.6, 30.3, 30.0, 29.7, 29.4, 29.1, 28.8, 28.5, 28.2, 27.9, 27.6, 27.3, 27.0, 26.7, 26.4, 26.1, 25.8, 25.5, 25.2, 24.9, 24.6, 24.3, 24.0, 23.7, 23.4, 23.1, 22.8, 22.5, 22.2, 21.9, 21.6, 21.3, 21.0, 20.7, 20.4, 20.1, 19.8, 19.5, 19.2, 18.9, 18.6, 18.3, 18.0, 17.7, 17.4, 17.1, 16.8, 16.5, 16.2, 15.9, 15.6, 15.3, 15.0, 14.7, 14.4, 14.1, 13.8, 13.5, 13.2, 12.9, 12.6, 12.3, 12.0, 11.7, 11.4, 11.1, 10.8, 10.5, 10.2, 9.9, 9.6, 9.3, 9.0, 8.7, 8.4, 8.1, 7.8, 7.5, 7.2, 6.9, 6.6, 6.3, 6.0, 5.7, 5.4, 5.1, 4.8, 4.5, 4.2, 3.9, 3.6, 3.3, 3.0, 2.7, 2.4, 2.1, 1.8, 1.5, 1.2, 0.9, 0.6, 0.3, 0.0.

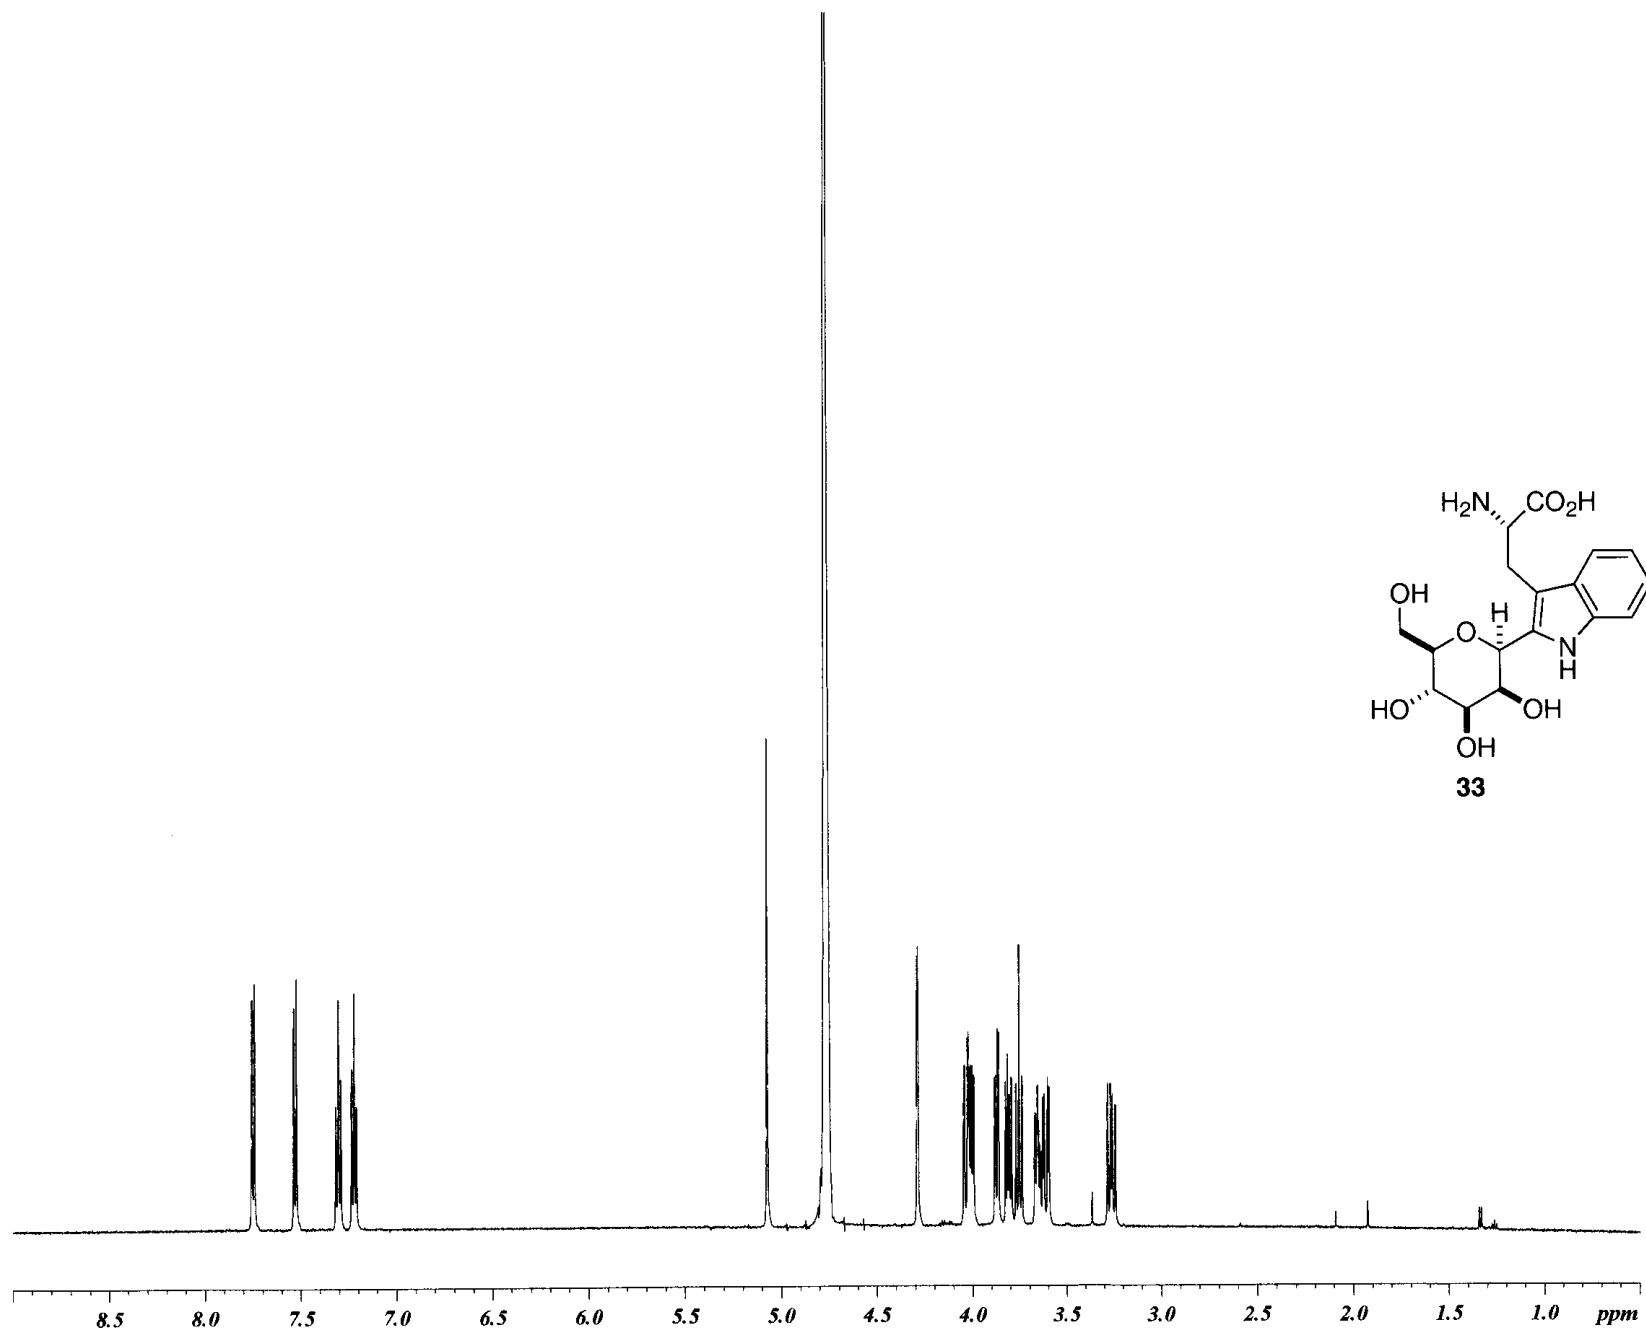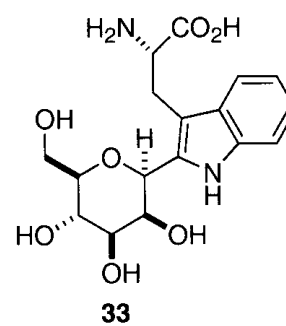



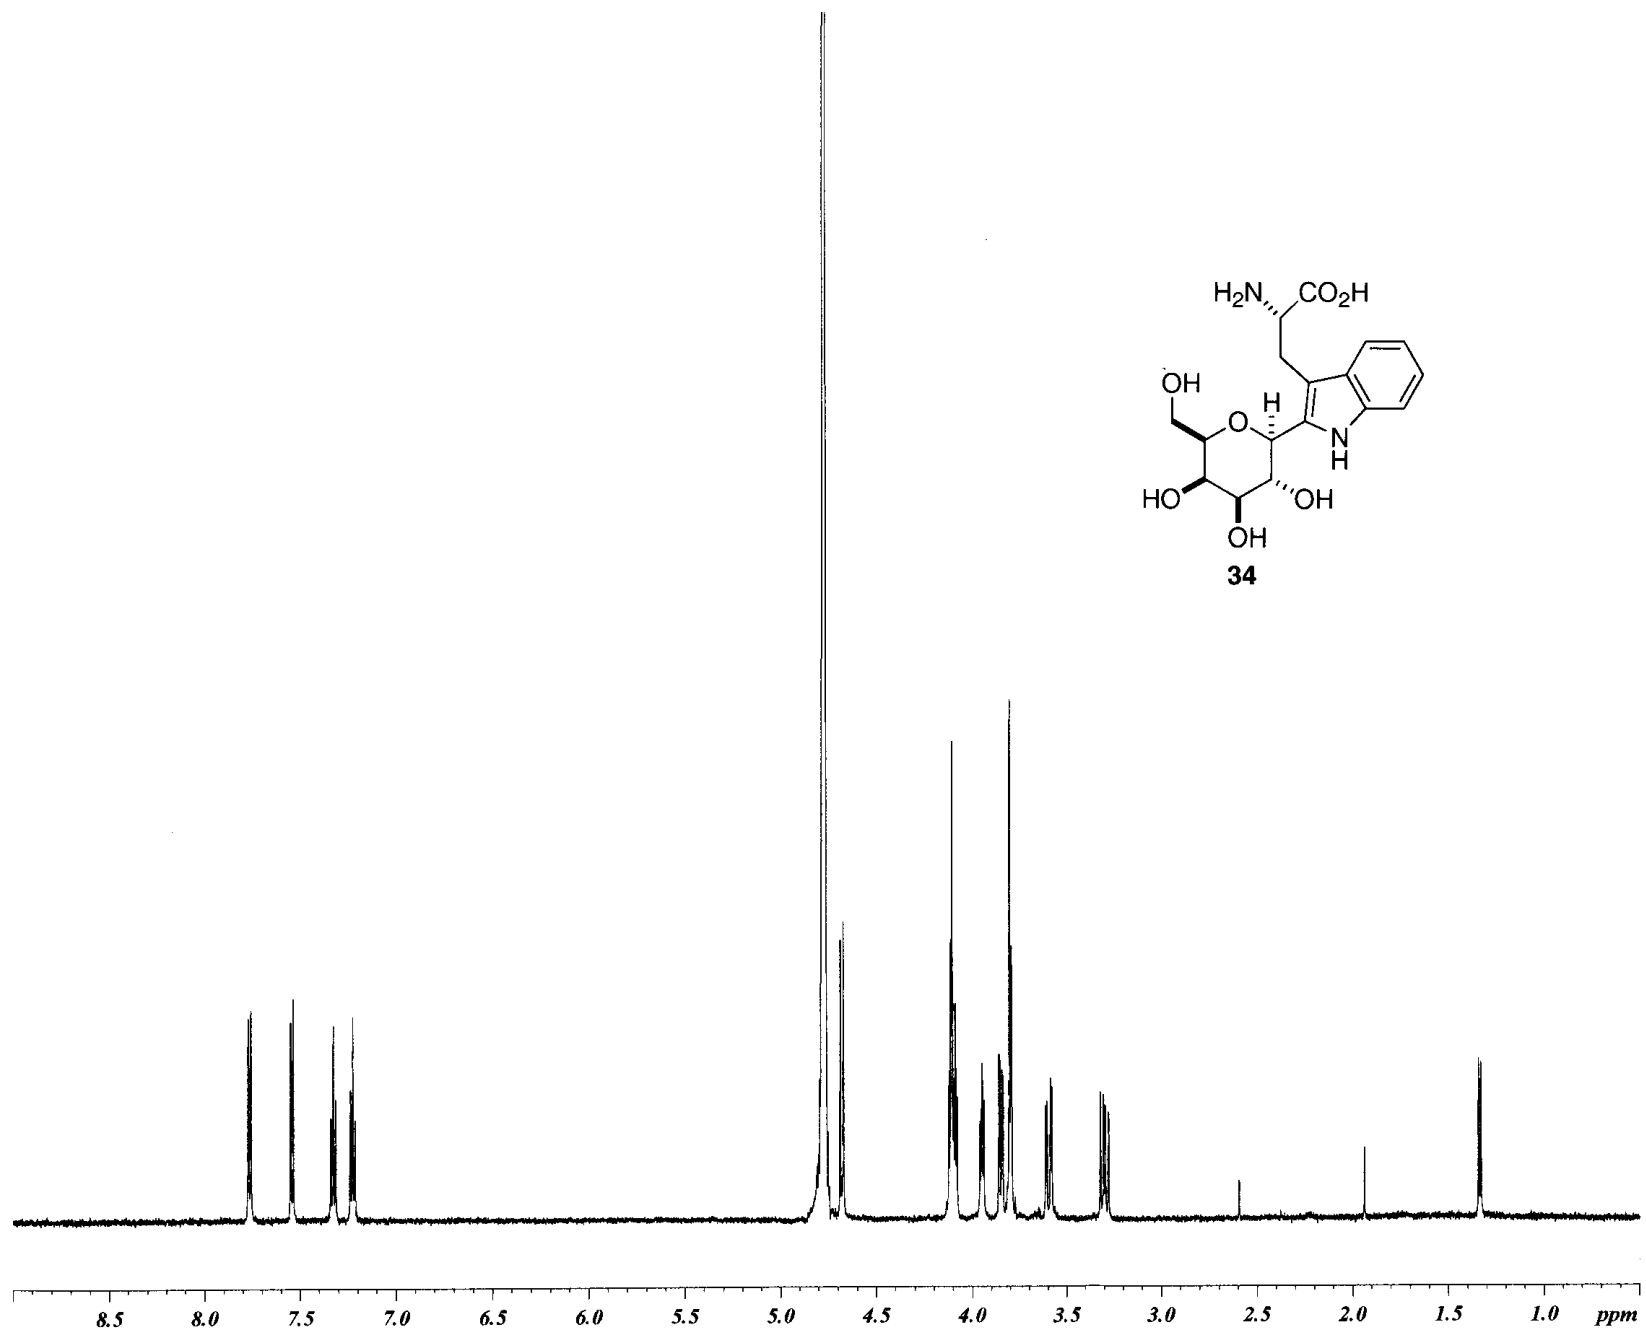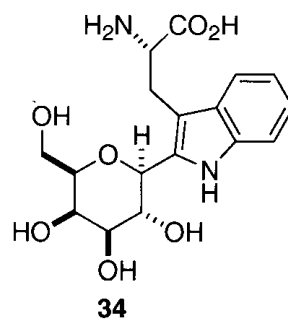

100-100-600

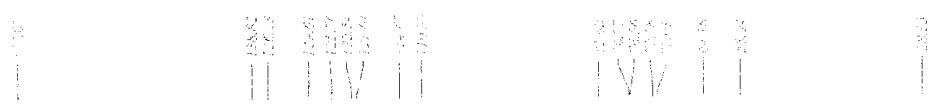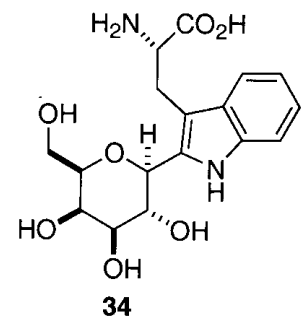

*13*C NMR (CDCl<sub>3</sub>) δ

|       |     |
|-------|-----|
| 171.0 | C=O |
| 169.0 | C=O |
| 168.0 | C=O |
| 167.0 | C=O |
| 166.0 | C=O |
| 165.0 | C=O |
| 164.0 | C=O |
| 163.0 | C=O |
| 162.0 | C=O |
| 161.0 | C=O |
| 160.0 | C=O |
| 159.0 | C=O |
| 158.0 | C=O |
| 157.0 | C=O |
| 156.0 | C=O |
| 155.0 | C=O |
| 154.0 | C=O |
| 153.0 | C=O |
| 152.0 | C=O |
| 151.0 | C=O |
| 150.0 | C=O |
| 149.0 | C=O |
| 148.0 | C=O |
| 147.0 | C=O |
| 146.0 | C=O |
| 145.0 | C=O |
| 144.0 | C=O |
| 143.0 | C=O |
| 142.0 | C=O |
| 141.0 | C=O |
| 140.0 | C=O |
| 139.0 | C=O |
| 138.0 | C=O |
| 137.0 | C=O |
| 136.0 | C=O |
| 135.0 | C=O |
| 134.0 | C=O |
| 133.0 | C=O |
| 132.0 | C=O |
| 131.0 | C=O |
| 130.0 | C=O |
| 129.0 | C=O |
| 128.0 | C=O |
| 127.0 | C=O |
| 126.0 | C=O |
| 125.0 | C=O |
| 124.0 | C=O |
| 123.0 | C=O |
| 122.0 | C=O |
| 121.0 | C=O |
| 120.0 | C=O |
| 119.0 | C=O |
| 118.0 | C=O |
| 117.0 | C=O |
| 116.0 | C=O |
| 115.0 | C=O |
| 114.0 | C=O |
| 113.0 | C=O |
| 112.0 | C=O |
| 111.0 | C=O |
| 110.0 | C=O |
| 109.0 | C=O |
| 108.0 | C=O |
| 107.0 | C=O |
| 106.0 | C=O |
| 105.0 | C=O |
| 104.0 | C=O |
| 103.0 | C=O |
| 102.0 | C=O |
| 101.0 | C=O |
| 100.0 | C=O |
| 99.0  | C=O |
| 98.0  | C=O |
| 97.0  | C=O |
| 96.0  | C=O |
| 95.0  | C=O |
| 94.0  | C=O |
| 93.0  | C=O |
| 92.0  | C=O |
| 91.0  | C=O |
| 90.0  | C=O |
| 89.0  | C=O |
| 88.0  | C=O |
| 87.0  | C=O |
| 86.0  | C=O |
| 85.0  | C=O |
| 84.0  | C=O |
| 83.0  | C=O |
| 82.0  | C=O |
| 81.0  | C=O |
| 80.0  | C=O |
| 79.0  | C=O |
| 78.0  | C=O |
| 77.0  | C=O |
| 76.0  | C=O |
| 75.0  | C=O |
| 74.0  | C=O |
| 73.0  | C=O |
| 72.0  | C=O |
| 71.0  | C=O |
| 70.0  | C=O |
| 69.0  | C=O |
| 68.0  | C=O |
| 67.0  | C=O |
| 66.0  | C=O |
| 65.0  | C=O |
| 64.0  | C=O |
| 63.0  | C=O |
| 62.0  | C=O |
| 61.0  | C=O |
| 60.0  | C=O |
| 59.0  | C=O |
| 58.0  | C=O |
| 57.0  | C=O |
| 56.0  | C=O |
| 55.0  | C=O |
| 54.0  | C=O |
| 53.0  | C=O |
| 52.0  | C=O |
| 51.0  | C=O |
| 50.0  | C=O |
| 49.0  | C=O |
| 48.0  | C=O |
| 47.0  | C=O |
| 46.0  | C=O |
| 45.0  | C=O |
| 44.0  | C=O |
| 43.0  | C=O |
| 42.0  | C=O |
| 41.0  | C=O |
| 40.0  | C=O |
| 39.0  | C=O |
| 38.0  | C=O |
| 37.0  | C=O |
| 36.0  | C=O |
| 35.0  | C=O |
| 34.0  | C=O |
| 33.0  | C=O |
| 32.0  | C=O |
| 31.0  | C=O |
| 30.0  | C=O |
| 29.0  | C=O |
| 28.0  | C=O |
| 27.0  | C=O |
| 26.0  | C=O |
| 25.0  | C=O |
| 24.0  | C=O |
| 23.0  | C=O |
| 22.0  | C=O |
| 21.0  | C=O |
| 20.0  | C=O |
| 19.0  | C=O |
| 18.0  | C=O |
| 17.0  | C=O |
| 16.0  | C=O |
| 15.0  | C=O |
| 14.0  | C=O |
| 13.0  | C=O |
| 12.0  | C=O |
| 11.0  | C=O |
| 10.0  | C=O |
| 9.0   | C=O |
| 8.0   | C=O |
| 7.0   | C=O |
| 6.0   | C=O |
| 5.0   | C=O |
| 4.0   | C=O |
| 3.0   | C=O |
| 2.0   | C=O |
| 1.0   | C=O |
| 0.0   | C=O |
| -1.0  | C=O |
| -2.0  | C=O |
| -3.0  | C=O |
| -4.0  | C=O |
| -5.0  | C=O |
| -6.0  | C=O |
| -7.0  | C=O |
| -8.0  | C=O |
| -9.0  | C=O |
| -10.0 | C=O |

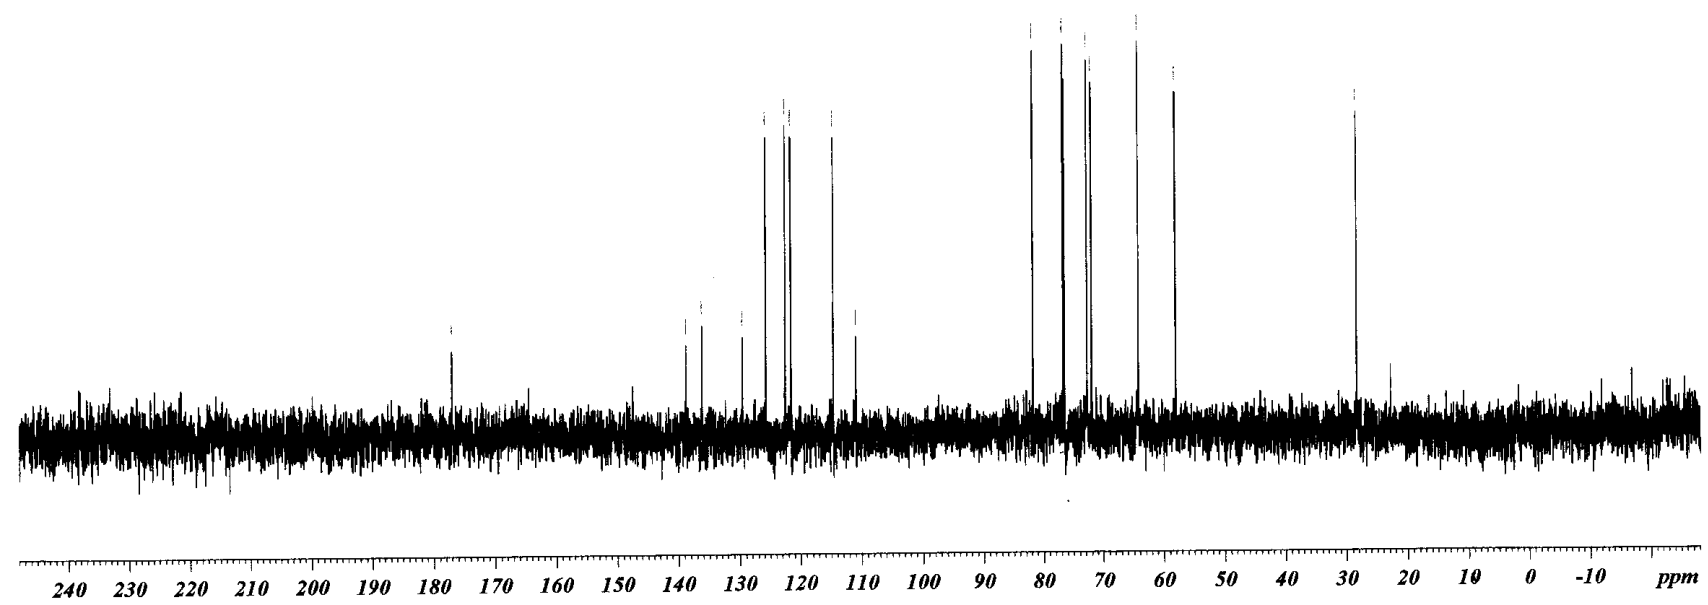



No title

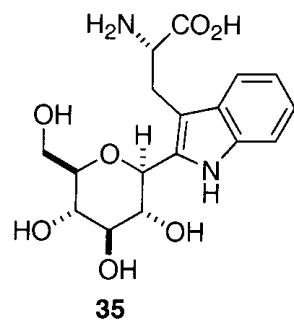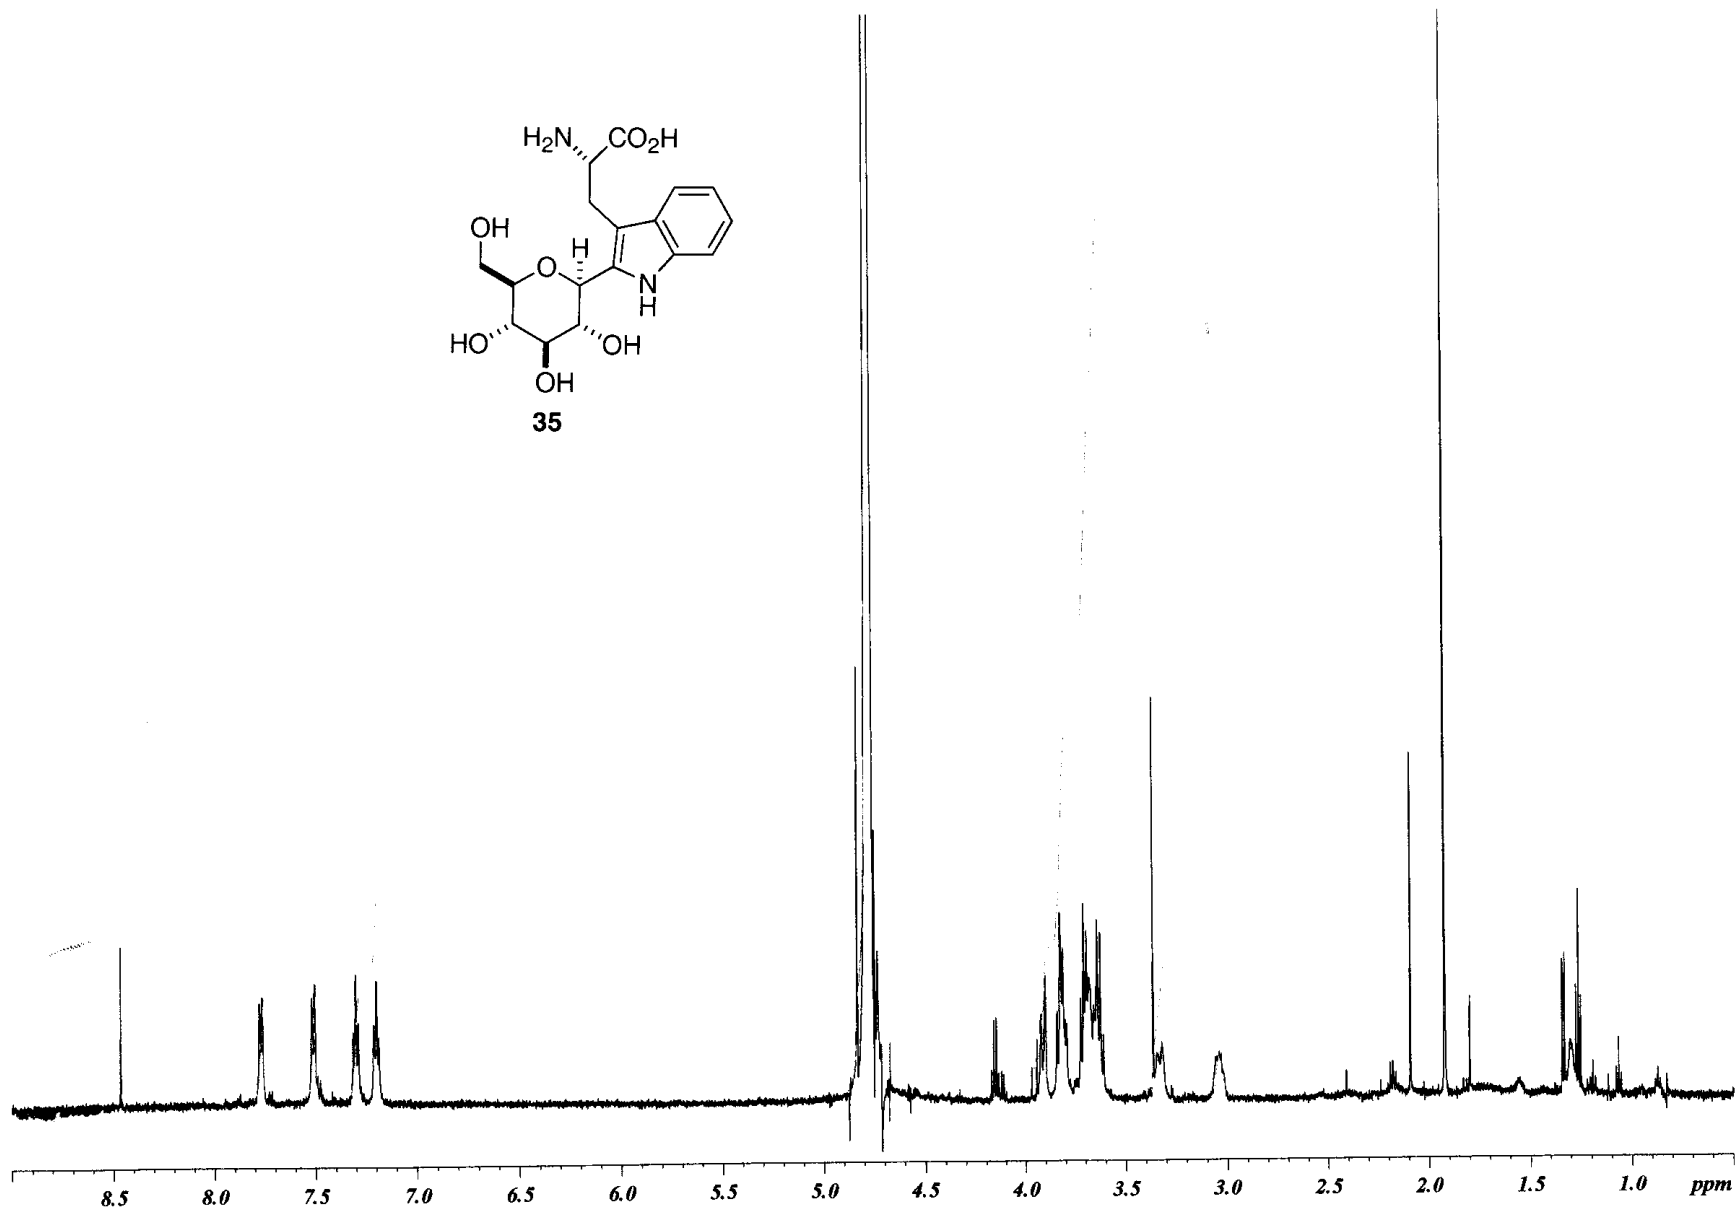

1.000

1.126

2.023

3.60

7.43

1.136

0.671

## Current Data Parameters

NAME koide  
EXPNO 21  
PROCNO 1

## F2 - Acquisition Parameters

Date\_ 720119  
Time 14.19  
INSTRUM AMX2600  
PROBHD 5 mm Dual 19  
PULPROG zg0dc  
TD 65536  
SOLVENT water  
NS 40000  
DS 2  
SWH 41666.668 Hz  
FIDRES 0.635783 Hz  
AQ 0.7864820 sec  
RG 32768  
DW 12.000 usec  
DE 15.00 usec  
TE 300.0 K

## F2 - Processing parameters

SI 65536  
SF 150.9043853 MHz  
WDW EM  
SSB 0  
LB 3.00 Hz  
GB 0  
PC 1.00

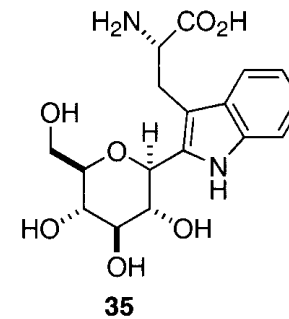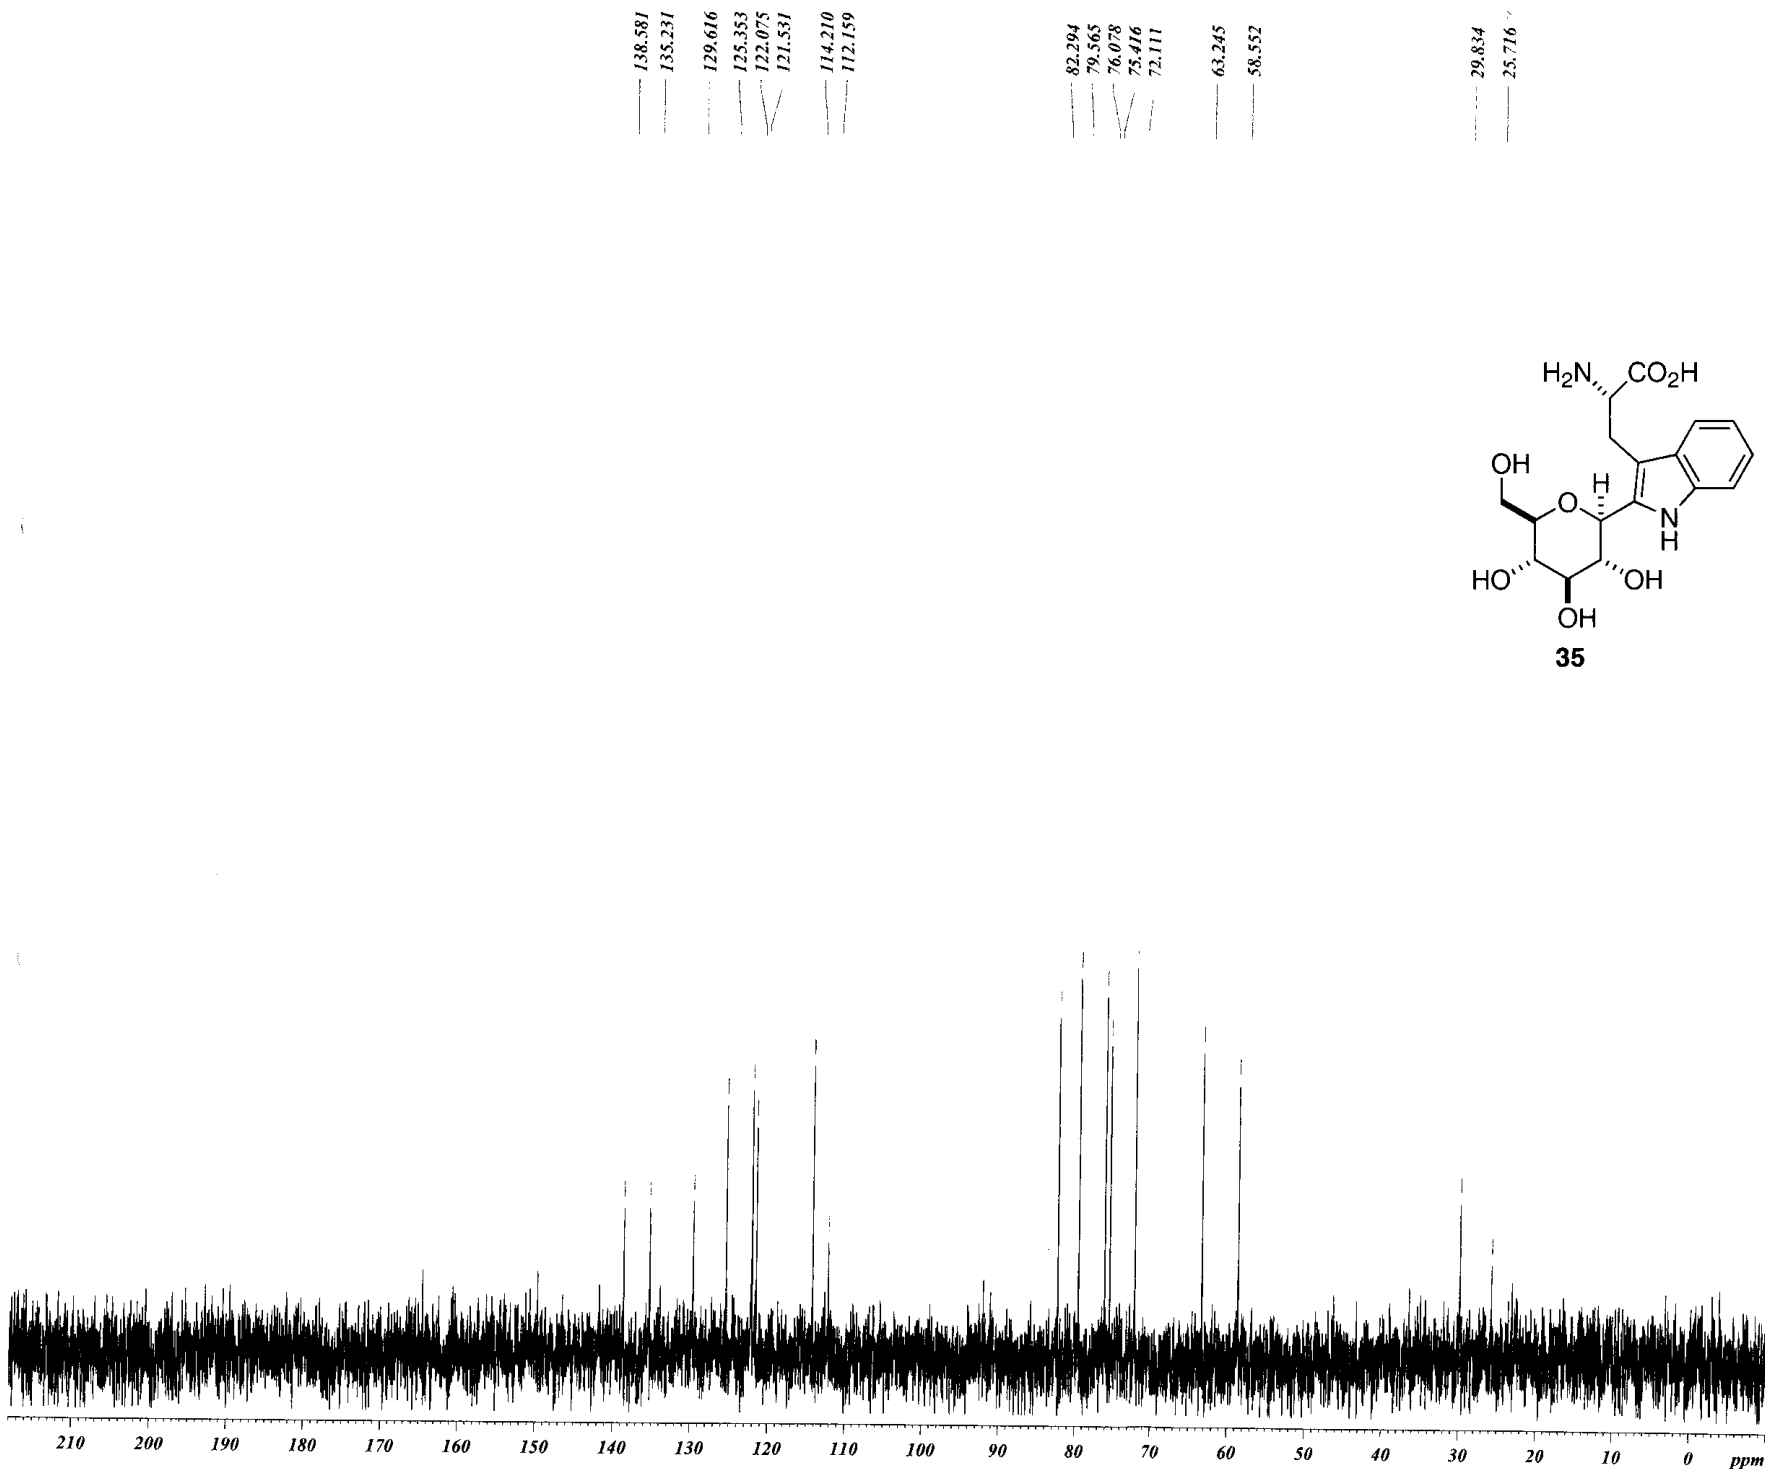

Supplement: b516282c.pdf [file b516282c.pdf]
